# Supplementary material
Source: HighWire-hosted journal article supplement (doi:10.1101/rna.073700.119)
Supplement: Supplemental_Figure_Legends.docx [file Supplemental_Figure_Legends.docx]

**Figure Supplementary 1. Distribution of *Nefl* in ventral roots.** **A-A’**, **B-B’** and **C-C’**. Single molecule FISH of *Nefl* in ventral root cryosection, confirming the localization of the axonal marker (*Nefl*). Phalloidin F-actin staining delineated the shape boundaries of Schwann cell and axon. Scale bar: 10 um.

**Figure Supplementary 2. A.** Protein-protein interaction network of genes detected in axoplasm sample using the STRING database. These genes are highly connected and are related to mitochondria (red), translation (green), cytoskeleton (blue), proteasome (yellow) and ubiquitination (pink). Not connected genes are not shown. **B.** Average and 95% CI of gene abundance of detected genes in mature myelinated axons. Abundance is shown for all genes detected (gray), and those coding for mitochondrial proteins (encoded by the mitochondrial genome (red) or nuclear genome (orange)), ribosomal proteins (green) and structural constituent of cytoskeleton (blue).
