# Supplementary material
Source: HighWire-hosted journal article supplement (doi:10.1101/rna.073700.119)
Supplement: Supplemental_Table1.xlsx [file Supplemental_Table1.xlsx]

## Sheet: Suppl_T1
Gene ID	Name	Description	Biotype	Axon_counts	Axon_TPM	Ventral root_counts	Ventral root_TPM
ENSRNOG00000043866	AY172581.24		Mt_rRNA	13804796	393468	8064591	251229
ENSRNOG00000030478	AY172581.9		Mt_rRNA	8379418	391655	5994197	306217
ENSRNOG00000030644	Mt-nd1	mitochondrially encoded NADH dehydrogenase 1 [Source:RGD Symbol;Acc:620555]	protein_coding	761874	35721.9	84844	4347.91
ENSRNOG00000031979	Mt-atp6	mitochondrially encoded ATP synthase 6 [Source:RGD Symbol;Acc:621239]	protein_coding	421414	27708.7	13336	958.347
ENSRNOG00000030700	Mt-co3	mitochondrially encoded cytochrome c oxidase III [Source:RGD Symbol;Acc:621873]	protein_coding	279605	15969.2	204193	12746.4
ENSRNOG00000034234	Mt-co1	mitochondrially encoded cytochrome c oxidase I [Source:RGD Symbol;Acc:621871]	protein_coding	490859	14226	350302	11096.3
ENSRNOG00000031053	Mt-nd4l	mitochondrially encoded NADH 4L dehydrogenase [Source:RGD Symbol;Acc:620494]	protein_coding	91243	13756.2	31609	5208.46
ENSRNOG00000031766	Mt-cyb	mitochondrially encoded cytochrome b [Source:RGD Symbol;Acc:620081]	protein_coding	307566	12048.9	115013	4924.52
ENSRNOG00000031033	Mt-nd2	mitochondrially encoded NADH dehydrogenase 2 [Source:RGD Symbol;Acc:620556]	protein_coding	209946	9047.86	62699	2953.3
ENSRNOG00000030371	Mt-co2	mitochondrially encoded cytochrome c oxidase II [Source:RGD Symbol;Acc:621872]	protein_coding	117247	7675.39	38108	2726.59
ENSRNOG00000029971	Mt-nd5	mitochondrially encoded NADH dehydrogenase 5 [Source:RGD Symbol;Acc:620560]	protein_coding	154715	3785.61	78504	2099.44
ENSRNOG00000046707	AABR07063425.1		miRNA	4718	3706.24	22181	19044.1
ENSRNOG00000029171	AY172581.3		Mt_tRNA	4497	2960.65	381	274.093
ENSRNOG00000033299	Mt-atp8	mitochondrially encoded ATP synthase 8 [Source:RGD Symbol;Acc:621240]	protein_coding	13441	2950.02	12884	3090.71
ENSRNOG00000055956	AABR07015078.1		protein_coding	26475	2884.25	36773	4378.67
ENSRNOG00000032112	AY172581.14		Mt_tRNA	4508	2690.85	2088	1362.22
ENSRNOG00000058589	AABR07046778.1		protein_coding	14728	2469.82	4288	785.845
ENSRNOG00000060896	AABR07063424.1		protein_coding	22101	2407.79	17227	2051.23
ENSRNOG00000055154	AABR07063462.1		miRNA	2743	2154.38	16798	14422.4
ENSRNOG00000047351	AABR07015081.1		miRNA	2535	1991.37	12143	10425.5
ENSRNOG00000050545	AABR07015056.1		miRNA	2491	1956.27	4915	4219.94
ENSRNOG00000032274	AY172581.15		Mt_tRNA	2953	1915.8	484	342.996
ENSRNOG00000029707	Mt-nd4	mitochondrially encoded NADH dehydrogenase 4 [Source:RGD Symbol;Acc:620559]	protein_coding	56090	1822.59	41905	1488.24
ENSRNOG00000002343	Uchl1	ubiquitin C-terminal hydrolase L1 [Source:RGD Symbol;Acc:3928]	protein_coding	40055	1685.64	1202	55.2572
ENSRNOG00000022619	Fth1	ferritin heavy chain 1 [Source:RGD Symbol;Acc:2635]	protein_coding	29901	1613.08	451800	26639.9
ENSRNOG00000050156	AABR07063425.2		miRNA	1668	1310.19	8472	7273.47
ENSRNOG00000060289	7SK	7SK RNA [Source:RFAM;Acc:RF00100]	misc_RNA	8459	1191.01	31874	4905.24
ENSRNOG00000016660	Cox5b	cytochrome c oxidase subunit 5B [Source:RGD Symbol;Acc:620608]	protein_coding	12289	1136.88	640	64.6251
ENSRNOG00000058555	7SK	7SK RNA [Source:RFAM;Acc:RF00100]	misc_RNA	8199	1109.08	28963	4282.31
ENSRNOG00000048912	AABR07064724.2		miRNA	1529	977.645	1	0.401259
ENSRNOG00000062158	AC134224.3		lincRNA	13996	901.666	73476	5173.97
ENSRNOG00000050963	AABR07064716.3		miRNA	1267	810.22	1222	853.802
ENSRNOG00000054657	AABR07015067.2		miRNA	1012	794.24	2192	1881.64
ENSRNOG00000013300	Atp5if1	ATP synthase inhibitory factor subunit 1 [Source:RGD Symbol;Acc:2181]	protein_coding	9009	780.209	728	68.8878
ENSRNOG00000029042	Mt-nd6	mitochondrially encoded NADH dehydrogenase 6 [Source:RGD Symbol;Acc:620561]	protein_coding	7992	689.43	2823	266.163
ENSRNOG00000047991	AABR07072283.1		miRNA	1055	674.687	554	386.763
ENSRNOG00000054945	AABR07015081.2		protein_coding	9516	639.778	21307	1565.65
ENSRNOG00000046600	AABR07015066.1		protein_coding	5456	594.392	18460	2198.03
ENSRNOG00000051404	AABR07014242.1		processed_pseudogene	5839	588.781	54	5.87636
ENSRNOG00000056747	AABR07015055.1		protein_coding	5300	577.38	13169	1567.99
ENSRNOG00000031333	AY172581.10		Mt_tRNA	856	563.313	65	46.6178
ENSRNOG00000061943	AC127784.5		processed_pseudogene	4121	550.726	194	28.1976
ENSRNOG00000018233	Gas6	growth arrest specific 6 [Source:RGD Symbol;Acc:61913]	protein_coding	4881	539.34	1557	35.3158
ENSRNOG00000049229	Pomp	proteasome maturation protein [Source:RGD Symbol;Acc:1305831]	protein_coding	7010	532.906	305	25.3162
ENSRNOG00000016288	Tcea2	transcription elongation factor A2 [Source:RGD Symbol;Acc:61825]	protein_coding	13811	517.906	486	19.8922
ENSRNOG00000057207	AABR07014239.1		processed_pseudogene	4947	498.856	87	9.49248
ENSRNOG00000058083	Metazoa_SRP	Metazoan signal recognition particle RNA [Source:RFAM;Acc:RF00017]	misc_RNA	3011	449.331	2525	411.89
ENSRNOG00000032320	AY172581.16		Mt_tRNA	660	434.267	91	65.3781
ENSRNOG00000001628	Pcp4	Purkinje cell protein 4 [Source:RGD Symbol;Acc:3271]	protein_coding	5404	371.102	232	21.5653
ENSRNOG00000014272	Rpl35	ribosomal protein L35 [Source:RGD Symbol;Acc:1303007]	protein_coding	3557	357.099	11661	1279.56
ENSRNOG00000029070	AY172581.1		Mt_tRNA	510	356.379	75	57.0457
ENSRNOG00000061096	Rn7sl1	RNA, 7SL, cytoplasmic 1 [Source:RGD Symbol;Acc:8157638]	misc_RNA	2368	353.293	2275	371.017
ENSRNOG00000026813	AABR07044933.1		protein_coding	3958	343.414	132	12.4392
ENSRNOG00000004196	LOC108351482	40S ribosomal protein S29 [Source:RGD Symbol;Acc:11511017]	protein_coding	2219	325.76	6463	1036.96
ENSRNOG00000053468	Tuba1b	tubulin, alpha 1B [Source:RGD Symbol;Acc:1565476]	protein_coding	11694	325.632	25770	784.307
ENSRNOG00000032609	AY172581.18		Mt_tRNA	515	319.774	44	29.8897
ENSRNOG00000019459	Oaz1	ornithine decarboxylase antizyme 1 [Source:RGD Symbol;Acc:3219]	protein_coding	4790	313.111	1094	78.1464
ENSRNOG00000007392	Atp6v1f	ATPase H+ transporting V1 subunit F [Source:RGD Symbol;Acc:621552]	protein_coding	4438	309.037	2091	159.098
ENSRNOG00000033615	Mt-nd3	mitochondrially encoded NADH dehydrogenase 3 [Source:RGD Symbol;Acc:620557]	protein_coding	2355	302.981	1693	237.96
ENSRNOG00000060293	Ndufa3	NADH:ubiquinone oxidoreductase subunit A3 [Source:RGD Symbol;Acc:1588687]	protein_coding	1860	301.688	839	148.73
ENSRNOG00000031171	Wdr46	WD repeat domain 46 [Source:RGD Symbol;Acc:2209]	protein_coding	14881	296.001	939	20.4065
ENSRNOG00000045759	AC135443.1		miRNA	495	276.732	585	357.78
ENSRNOG00000018343	Isca1	iron-sulfur cluster assembly 1 [Source:RGD Symbol;Acc:727792]	protein_coding	11332	273.971	643	16.9853
ENSRNOG00000006037	Snap25	synaptosomal-associated protein 25 [Source:MGI Symbol;Acc:MGI:98331]	protein_coding	10425	272.013	899	25.6192
ENSRNOG00000006542	Atp6v0c	ATPase H+ transporting V0 subunit C [Source:RGD Symbol;Acc:621394]	protein_coding	6895	268.233	3602	153.124
ENSRNOG00000053717	Metazoa_SRP	Metazoan signal recognition particle RNA [Source:RFAM;Acc:RF00017]	misc_RNA	1657	262.064	546	94.2991
ENSRNOG00000020979	Psmb4	proteasome subunit beta 4 [Source:RGD Symbol;Acc:61877]	protein_coding	4367	232.183	1507	87.5785
ENSRNOG00000015550	Ptgds	prostaglandin D2 synthase [Source:RGD Symbol;Acc:3433]	protein_coding	4054	230.946	35335	2200.11
ENSRNOG00000037402	Cops9	COP9 signalosome subunit 9 [Source:RGD Symbol;Acc:1596701]	protein_coding	2310	212.762	1960	197.313
ENSRNOG00000059586	AABR07015080.2		protein_coding	1933	210.548	4194	499.393
ENSRNOG00000053757	Gm24451	predicted gene, 24451 [Source:MGI Symbol;Acc:MGI:5454228]	snoRNA	575	194.735	28	10.2922
ENSRNOG00000053902	Metazoa_SRP	Metazoan signal recognition particle RNA [Source:RFAM;Acc:RF00017]	misc_RNA	1292	193.441	555	90.7194
ENSRNOG00000009364	Ndufb9	NADH:ubiquinone oxidoreductase subunit B9 [Source:RGD Symbol;Acc:1307114]	protein_coding	3034	192.942	928	64.4961
ENSRNOG00000022153	Tmem134	transmembrane protein 134 [Source:RGD Symbol;Acc:1305824]	protein_coding	3855	189.856	315	17.272
ENSRNOG00000028822	Bex3	brain expressed X-linked 3 [Source:RGD Symbol;Acc:3148]	protein_coding	3239	189.332	1856	118.558
ENSRNOG00000060728	Tuba1a	tubulin, alpha 1A [Source:RGD Symbol;Acc:619717]	protein_coding	6764	187.284	37605	1138.15
ENSRNOG00000002840	Atp5f1b	ATP synthase F1 subunit beta [Source:RGD Symbol;Acc:621368]	protein_coding	7395	186.741	6660	183.828
ENSRNOG00000004680	Kif5c	kinesin family member 5C [Source:RGD Symbol;Acc:1308539]	protein_coding	13807	181.904	1350	16.2335
ENSRNOG00000014415	Hsbp1	heat shock factor binding protein 1 [Source:RGD Symbol;Acc:628632]	protein_coding	4921	177.252	2577	101.46
ENSRNOG00000006949	C1qbp	complement C1q binding protein [Source:RGD Symbol;Acc:2230]	protein_coding	4298	177.211	1020	45.9593
ENSRNOG00000016580	Rps23	ribosomal protein S23 [Source:RGD Symbol;Acc:621039]	protein_coding	2018	177.106	2265	217.325
ENSRNOG00000029954	AY172581.7		Mt_tRNA	252	170.487	69	50.5368
ENSRNOG00000020346	Best1	bestrophin 1 [Source:RGD Symbol;Acc:1311656]	protein_coding	16770	166.829	149796	1628.75
ENSRNOG00000052862	Metazoa_SRP	Metazoan signal recognition particle RNA [Source:RFAM;Acc:RF00017]	misc_RNA	1080	166.649	442	74.5717
ENSRNOG00000018881	Rnasek	ribonuclease K [Source:RGD Symbol;Acc:1305687]	protein_coding	2105	160.256	2347	195.331
ENSRNOG00000038239	Spata33	spermatogenesis associated 33 [Source:RGD Symbol;Acc:1561507]	protein_coding	1994	159.707	89	7.74869
ENSRNOG00000042233	Rpl41	ribosomal protein L41 [Source:RGD Symbol;Acc:621210]	protein_coding	1541	155.732	11186	1235.67
ENSRNOG00000000938	Ran	RAN, member RAS oncogene family [Source:RGD Symbol;Acc:620367]	protein_coding	3767	152.752	431	19.0721
ENSRNOG00000055021	Gm25541	predicted gene, 25541 [Source:MGI Symbol;Acc:MGI:5455318]	snRNA	418	148.371	2	0.502347
ENSRNOG00000009823	Naa38	N(alpha)-acetyltransferase 38, NatC auxiliary subunit [Source:RGD Symbol;Acc:1559617]	protein_coding	2338	147.231	682	46.943
ENSRNOG00000032997	AY172581.20		Mt_tRNA	219	141.989	101	71.5615
ENSRNOG00000000340	Rtraf	RNA transcription, translation and transport factor [Source:RGD Symbol;Acc:1304704]	protein_coding	3182	139.806	622	29.8705
ENSRNOG00000011222	Dynll1	dynein light chain LC8-type 1 [Source:RGD Symbol;Acc:619866]	protein_coding	2003	137.507	2124	159.365
ENSRNOG00000047931	Tmsb4x	thymosin beta 4, X-linked [Source:RGD Symbol;Acc:621622]	protein_coding	1809	136.344	7599	626.084
ENSRNOG00000001295	S100b	S100 calcium binding protein B [Source:RGD Symbol;Acc:3615]	protein_coding	4442	134.007	84737	2794.49
ENSRNOG00000013658	Nefl	neurofilament light [Source:RGD Symbol;Acc:621458]	protein_coding	10125	133.618	3237	46.6832
ENSRNOG00000018590	Drg1	developmentally regulated GTP binding protein 1 [Source:RGD Symbol;Acc:1304993]	protein_coding	4749	132.317	219	6.6623
ENSRNOG00000007701	Thoc7	THO complex 7 [Source:RGD Symbol;Acc:1305475]	protein_coding	4822	128.2	237	7.87629
ENSRNOG00000062127	AC134224.1		lincRNA	6488	123.61	27912	581.265
ENSRNOG00000056247	7SK	7SK RNA [Source:RFAM;Acc:RF00100]	misc_RNA	906	120.02	4996	723.352
ENSRNOG00000023529	Rpl5	ribosomal protein L5 [Source:RGD Symbol;Acc:619825]	protein_coding	2827	118.393	8023	367.287
ENSRNOG00000013657	Stmn3	stathmin 3 [Source:RGD Symbol;Acc:3628]	protein_coding	2699	111.449	284	15.9388
ENSRNOG00000058006	Sncg	synuclein, gamma [Source:RGD Symbol;Acc:70996]	protein_coding	1901	110.524	4415	305.949
ENSRNOG00000013604	Gpx4	glutathione peroxidase 4 [Source:RGD Symbol;Acc:69226]	protein_coding	2435	109.879	649	41.6138
ENSRNOG00000042740	Mrpl42	mitochondrial ribosomal protein L42 [Source:RGD Symbol;Acc:1304915]	protein_coding	1547	103.216	842	61.3606
ENSRNOG00000010038	Psmc5	proteasome 26S subunit, ATPase 5 [Source:RGD Symbol;Acc:708376]	protein_coding	2947	102.445	1018	38.6783
ENSRNOG00000053752	7SK	7SK RNA [Source:RFAM;Acc:RF00100]	misc_RNA	697	101.872	6860	1097.01
ENSRNOG00000058301	7SK	7SK RNA [Source:RFAM;Acc:RF00100]	misc_RNA	729	101.618	4896	746.341
ENSRNOG00000059651	7SK	7SK RNA [Source:RFAM;Acc:RF00100]	misc_RNA	707	99.1955	6756	1036.33
ENSRNOG00000020595	Rps11	ribosomal protein S11 [Source:RGD Symbol;Acc:621026]	protein_coding	2883	98.829	3758	295.238
ENSRNOG00000023226	S100a10	S100 calcium binding protein A10 [Source:RGD Symbol;Acc:628655]	protein_coding	1249	97.5259	2317	197.859
ENSRNOG00000054689	Cox7b	cytochrome c oxidase subunit 7B [Source:RGD Symbol;Acc:727789]	protein_coding	1019	95.3657	790	80.861
ENSRNOG00000010881	Trak2	trafficking kinesin protein 2 [Source:RGD Symbol;Acc:620915]	protein_coding	12793	95.2788	4352	35.4212
ENSRNOG00000031780	AY172581.13		Mt_tRNA	142	94.8382	127	92.1729
ENSRNOG00000060479	Sp3	Sp3 transcription factor [Source:RGD Symbol;Acc:1583765]	protein_coding	4497	93.8554	1060	24.1763
ENSRNOG00000021052	Patl1	PAT1 homolog 1, processing body mRNA decay factor [Source:RGD Symbol;Acc:1305514]	protein_coding	8323	92.8446	985	12.0074
ENSRNOG00000021067	Fxyd7	FXYD domain-containing ion transport regulator 7 [Source:RGD Symbol;Acc:620830]	protein_coding	1479	92.707	729	49.917
ENSRNOG00000048598	AABR07037925.1		miRNA	124	92.2212	1	0.300241
ENSRNOG00000060518	AABR07015057.1		protein_coding	1366	91.759	7921	582.045
ENSRNOG00000008830	Nfe2l1	nuclear factor, erythroid 2-like 1 [Source:RGD Symbol;Acc:1311972]	protein_coding	5724	90.6238	4781	82.7296
ENSRNOG00000030339	AY172581.8		Mt_tRNA	133	88.6719	11	7.48953
ENSRNOG00000020233	Rabac1	Rab acceptor 1 [Source:RGD Symbol;Acc:621002]	protein_coding	1725	88.07	1729	96.4377
ENSRNOG00000030520	Sarnp	SAP domain containing ribonucleoprotein [Source:RGD Symbol;Acc:1305692]	protein_coding	2183	88.022	1073	47.3026
ENSRNOG00000023765	Nyap2	neuronal tyrosine-phosphorylated phosphoinositide-3-kinase adaptor 2 [Source:RGD Symbol;Acc:9171458]	protein_coding	5687	87.4949	233	3.90489
ENSRNOG00000020897	Prpf19	pre-mRNA processing factor 19 [Source:RGD Symbol;Acc:708496]	protein_coding	4085	86.5148	664	15.362
ENSRNOG00000042499	Tmsb10	thymosin, beta 10 [Source:RGD Symbol;Acc:62022]	protein_coding	992	84.9646	4287	429.096
ENSRNOG00000014828	Avpi1	arginine vasopressin-induced 1 [Source:RGD Symbol;Acc:621721]	protein_coding	2047	84.5434	248	11.1589
ENSRNOG00000048682	Zwint	ZW10 interacting kinetochore protein [Source:RGD Symbol;Acc:628671]	protein_coding	3360	82.157	775	20.6901
ENSRNOG00000031685	AY172581.12		Mt_tRNA	124	81.4064	45	31.8398
ENSRNOG00000039850	Pigp	phosphatidylinositol glycan anchor biosynthesis, class P [Source:RGD Symbol;Acc:1307205]	protein_coding	1033	81.2272	1192	94.0512
ENSRNOG00000015733	Myl12b	myosin light chain 12B [Source:RGD Symbol;Acc:628855]	protein_coding	2121	79.6696	4628	190.004
ENSRNOG00000003029	Calr	calreticulin [Source:RGD Symbol;Acc:620288]	protein_coding	3235	77.6654	3772	98.9724
ENSRNOG00000011955	AABR07026997.1		protein_coding	584	75.7958	693	98.2227
ENSRNOG00000053680	Kansl1	KAT8 regulatory NSL complex subunit 1 [Source:RGD Symbol;Acc:1311429]	protein_coding	5259	75.6575	1422	22.3497
ENSRNOG00000055962	Bgn	biglycan [Source:RGD Symbol;Acc:2207]	protein_coding	4050	74.734	19967	402.779
ENSRNOG00000020660	Cfl1	cofilin 1 [Source:RGD Symbol;Acc:69285]	protein_coding	1843	74.6602	3640	161.189
ENSRNOG00000055947	7SK	7SK RNA [Source:RFAM;Acc:RF00100]	misc_RNA	531	73.572	4313	653.42
ENSRNOG00000001596	Atp5mc3	ATP synthase membrane subunit c locus 3 [Source:RGD Symbol;Acc:620052]	protein_coding	1187	73.209	844	56.859
ENSRNOG00000009882	Ppp3ca	protein phosphatase 3 catalytic subunit alpha [Source:RGD Symbol;Acc:3382]	protein_coding	3708	71.3664	469	9.85898
ENSRNOG00000026260	Rpl11	ribosomal protein L11 [Source:RGD Symbol;Acc:1308681]	protein_coding	1534	70.9584	4772	268.49
ENSRNOG00000014051	Pgrmc2	progesterone receptor membrane component 2 [Source:RGD Symbol;Acc:1308804]	protein_coding	2887	70.7449	1071	28.6836
ENSRNOG00000003983	Pfdn2	prefoldin subunit 2 [Source:RGD Symbol;Acc:1591406]	protein_coding	2630	70.639	1885	55.3119
ENSRNOG00000019834	Hsp90ab1	heat shock protein 90 alpha family class B member 1 [Source:RGD Symbol;Acc:1303075]	protein_coding	4194	70.5671	10531	218.462
ENSRNOG00000001049	Tpt1	tumor protein, translationally-controlled 1 [Source:RGD Symbol;Acc:621623]	protein_coding	1242	70.0931	16764	1034.59
ENSRNOG00000013874	Rplp1	ribosomal protein lateral stalk subunit P1 [Source:RGD Symbol;Acc:621774]	protein_coding	753	67.965	4599	453.745
ENSRNOG00000054058	Osbpl1a	oxysterol binding protein-like 1A [Source:RGD Symbol;Acc:628888]	protein_coding	4605	67.8036	1226	19.7195
ENSRNOG00000056970	AABR07063425.3		protein_coding	687	67.4445	2982	320.034
ENSRNOG00000002680	Lamc1	laminin subunit gamma 1 [Source:RGD Symbol;Acc:621052]	protein_coding	1180	67.3312	12280	109.978
ENSRNOG00000012209	Cdadc1	cytidine and dCMP deaminase domain containing 1 [Source:RGD Symbol;Acc:1311845]	protein_coding	1554	66.9423	195	9.26465
ENSRNOG00000019578	Rps16	ribosomal protein S16 [Source:RGD Symbol;Acc:621031]	protein_coding	1181	65.5797	2816	176.958
ENSRNOG00000003841	Kcnh1	potassium voltage-gated channel subfamily H member 1 [Source:RGD Symbol;Acc:68398]	protein_coding	6666	65.4627	0	0
ENSRNOG00000021808	Tecr	trans-2,3-enoyl-CoA reductase [Source:RGD Symbol;Acc:620376]	protein_coding	1697	64.9099	6129	256.363
ENSRNOG00000005041	Crip2	cysteine-rich protein 2 [Source:RGD Symbol;Acc:1302959]	protein_coding	1663	64.5232	1750	74.2081
ENSRNOG00000027864	Ppia	peptidylprolyl isomerase A [Source:RGD Symbol;Acc:3372]	protein_coding	1039	63.1661	4252	285.983
ENSRNOG00000000438	Rnf5	ring finger protein 5 [Source:RGD Symbol;Acc:1588458]	protein_coding	999	62.8052	561	24.8786
ENSRNOG00000033545	AY172581.21		Mt_tRNA	99	62.0404	53	36.1468
ENSRNOG00000047746	AABR07000398.1		protein_coding	1565	61.4585	67193	2884.57
ENSRNOG00000000991	Arpc1b	actin related protein 2/3 complex, subunit 1B [Source:RGD Symbol;Acc:2155]	protein_coding	2027	59.8559	1639	52.883
ENSRNOG00000010146	Ndn	necdin, MAGE family member [Source:RGD Symbol;Acc:1310526]	protein_coding	2134	59.8283	57	1.7439
ENSRNOG00000046349	AABR07067829.1		protein_coding	637	59.0203	1729	175.136
ENSRNOG00000016890	Tppp3	tubulin polymerization-promoting protein family member 3 [Source:RGD Symbol;Acc:1305061]	protein_coding	1273	58.3297	494	24.7036
ENSRNOG00000013508	Rpl31	ribosomal protein L31 [Source:RGD Symbol;Acc:621202]	protein_coding	1458	57.0665	5106	218.427
ENSRNOG00000048224	AABR07035224.1		miRNA	81	56.03	51	38.9473
ENSRNOG00000028149	Kansl1l	KAT8 regulatory NSL complex subunit 1-like [Source:RGD Symbol;Acc:1590799]	protein_coding	3693	55.6284	1577	25.9666
ENSRNOG00000029886	Hba-a2	hemoglobin alpha, adult chain 2 [Source:RGD Symbol;Acc:1359364]	protein_coding	667	53.6917	12675	1115.6
ENSRNOG00000031560	AABR07030162.1		protein_coding	578	53.563	673	68.1133
ENSRNOG00000001170	Cox6a1	cytochrome c oxidase subunit 6A1 [Source:RGD Symbol;Acc:2384]	protein_coding	654	53.2829	1532	136.497
ENSRNOG00000017123	B2m	beta-2 microglobulin [Source:RGD Symbol;Acc:2189]	protein_coding	2153	52.7645	24328	651.657
ENSRNOG00000013916	Nefm	neurofilament medium [Source:RGD Symbol;Acc:3160]	protein_coding	3566	52.1693	1438	22.9927
ENSRNOG00000006137	Arid1a	AT-rich interaction domain 1A [Source:RGD Symbol;Acc:1310500]	protein_coding	9189	51.869	3810	23.5032
ENSRNOG00000042696	Micos10	mitochondrial contact site and cristae organizing system subunit 10 [Source:RGD Symbol;Acc:1560187]	protein_coding	583	51.6448	757	73.3455
ENSRNOG00000005191	Trim44	tripartite motif-containing 44 [Source:RGD Symbol;Acc:1304877]	protein_coding	1583	50.9904	744	26.1828
ENSRNOG00000058829	AABR07031150.1		pseudogene	706	50.5735	4	0.297555
ENSRNOG00000016961	Rps27	ribosomal protein S27 [Source:RGD Symbol;Acc:621045]	protein_coding	381	49.7523	3390	485.022
ENSRNOG00000017583	Mapkap1	mitogen-activated protein kinase associated protein 1 [Source:RGD Symbol;Acc:1305363]	protein_coding	3799	48.4403	1617	22.5324
ENSRNOG00000021259	Prnp	prion protein [Source:RGD Symbol;Acc:3410]	protein_coding	2313	48.3484	2023	46.2047
ENSRNOG00000038044	Tsc22d2	TSC22 domain family, member 2 [Source:RGD Symbol;Acc:1593169]	protein_coding	4939	48.0889	724	11.2995
ENSRNOG00000012162	Mpdu1	mannose-P-dolichol utilization defect 1 [Source:RGD Symbol;Acc:1307699]	protein_coding	1353	47.4256	497	19.031
ENSRNOG00000049176	AABR07035218.2		miRNA	67	46.253	45	34.1621
ENSRNOG00000002115	Sod1	superoxide dismutase 1 [Source:RGD Symbol;Acc:3731]	protein_coding	678	46.2259	2027	151.214
ENSRNOG00000049624	AABR07070277.2		miRNA	94	46.1839	67	35.9259
ENSRNOG00000011705	Stmn2	stathmin 2 [Source:RGD Symbol;Acc:68947]	protein_coding	2085	45.234	2790	66.1694
ENSRNOG00000033100	AABR07054189.1		processed_pseudogene	548	44.8831	11849	1062
ENSRNOG00000028580	Pcnx2	pecanex 2 [Source:RGD Symbol;Acc:1305883]	protein_coding	6346	44.572	0	0
ENSRNOG00000012840	Sparc	secreted protein acidic and cysteine rich [Source:RGD Symbol;Acc:3742]	protein_coding	2042	44.3172	46486	1102.77
ENSRNOG00000020748	Map4	microtubule-associated protein 4 [Source:RGD Symbol;Acc:1564359]	protein_coding	6739	44.2314	30352	268.1
ENSRNOG00000025580	LOC100912618	ubiquitin-conjugating enzyme E2 variant 1-like [Source:RGD Symbol;Acc:6486058]	protein_coding	1684	43.0664	690	19.2715
ENSRNOG00000033024	AC099453.1		protein_coding	408	42.5555	665	75.7699
ENSRNOG00000010067	Lypla2	lysophospholipase 2 [Source:RGD Symbol;Acc:620210]	protein_coding	1458	42.4717	449	14.2928
ENSRNOG00000039819	AABR07035338.1		processed_transcript	578	42.1825	414	5.92204
ENSRNOG00000013794	Rbp1	retinol binding protein 1 [Source:RGD Symbol;Acc:3543]	protein_coding	652	41.9	1229	86.3811
ENSRNOG00000017418	Rps3	ribosomal protein S3 [Source:RGD Symbol;Acc:619888]	protein_coding	753	41.6588	6037	365.152
ENSRNOG00000061297	Metazoa_SRP	Metazoan signal recognition particle RNA [Source:RFAM;Acc:RF00017]	misc_RNA	276	41.3036	172	28.1268
ENSRNOG00000018225	Tp53inp2	tumor protein p53 inducible nuclear protein 2 [Source:RGD Symbol;Acc:735085]	protein_coding	3694	40.9837	3219	39.0387
ENSRNOG00000008605	Ost4	oligosaccharyltransferase complex subunit 4, non-catalytic [Source:RGD Symbol;Acc:2300150]	protein_coding	503	40.7979	4568	458.26
ENSRNOG00000019974	Uba52	ubiquitin A-52 residue ribosomal protein fusion product 1 [Source:RGD Symbol;Acc:68344]	protein_coding	459	40.6938	3642	353.554
ENSRNOG00000018795	Rpl18a	ribosomal protein L18A [Source:RGD Symbol;Acc:1302976]	protein_coding	594	40.1217	16316	1206.17
ENSRNOG00000056755	7SK	7SK RNA [Source:RFAM;Acc:RF00100]	misc_RNA	285	40.0045	6439	990.862
ENSRNOG00000016930	Ube2s	ubiquitin-conjugating enzyme E2S [Source:RGD Symbol;Acc:1564746]	protein_coding	836	39.5416	214	11.048
ENSRNOG00000007367	Sept4	septin 4 [Source:RGD Symbol;Acc:1308781]	protein_coding	1394	38.8795	476	22.0556
ENSRNOG00000008405	Taco1	translational activator of cytochrome c oxidase I [Source:RGD Symbol;Acc:1306784]	protein_coding	1305	38.7406	35	1.1216
ENSRNOG00000015962	Nmnat1	nicotinamide nucleotide adenylyltransferase 1 [Source:RGD Symbol;Acc:1310996]	protein_coding	1809	38.4987	203	4.71202
ENSRNOG00000019587	Ptprn	protein tyrosine phosphatase, receptor type, N [Source:RGD Symbol;Acc:620777]	protein_coding	3087	38.238	0	0
ENSRNOG00000059334	Fbxl3	F-box and leucine-rich repeat protein 3 [Source:RGD Symbol;Acc:1305660]	protein_coding	2898	37.8186	916	15.0996
ENSRNOG00000056728	G6pd	glucose-6-phosphate dehydrogenase [Source:RGD Symbol;Acc:2645]	protein_coding	2009	37.7876	2442	50.2021
ENSRNOG00000020634	Pih1d1	PIH1 domain containing 1 [Source:RGD Symbol;Acc:1309809]	protein_coding	1072	37.401	0	0
ENSRNOG00000003973	Cyb5r1	cytochrome b5 reductase 1 [Source:RGD Symbol;Acc:1306084]	protein_coding	1518	37.058	77	2.03018
ENSRNOG00000015514	Bcat1	branched chain amino acid transaminase 1 [Source:RGD Symbol;Acc:2195]	protein_coding	2066	37.0434	1033	20.2421
ENSRNOG00000007290	Atp1a2	ATPase Na+/K+ transporting subunit alpha 2 [Source:RGD Symbol;Acc:2168]	protein_coding	4158	36.3015	35317	337.049
ENSRNOG00000021412	Slfn13	schlafen family member 13 [Source:RGD Symbol;Acc:1359139]	protein_coding	2705	35.9185	404	5.85656
ENSRNOG00000029644	Clec2l	C-type lectin domain family 2, member L [Source:RGD Symbol;Acc:1565373]	protein_coding	1127	35.2892	0	0
ENSRNOG00000004060	Calm1	calmodulin 1 [Source:RGD Symbol;Acc:2257]	protein_coding	1141	35.2456	6312	213.176
ENSRNOG00000004693	Pbx1	PBX homeobox 1 [Source:RGD Symbol;Acc:1308213]	protein_coding	1725	35.0417	1173	26.0532
ENSRNOG00000036971	Smim26	small integral membrane protein 26 [Source:RGD Symbol;Acc:1566320]	protein_coding	503	34.7958	78	5.88695
ENSRNOG00000004426	Rps27a	ribosomal protein S27a [Source:RGD Symbol;Acc:6489478]	protein_coding	361	34.2788	2383	247.538
ENSRNOG00000019629	Lamp1	lysosomal-associated membrane protein 1 [Source:RGD Symbol;Acc:2989]	protein_coding	1752	33.3848	5797	133.923
ENSRNOG00000003338	Pmp22	peripheral myelin protein 22 [Source:RGD Symbol;Acc:3359]	protein_coding	1352	33.2939	96885	2609.57
ENSRNOG00000016511	Pitrm1	pitrilysin metallopeptidase 1 [Source:RGD Symbol;Acc:1310998]	protein_coding	2557	33.174	719	10.1853
ENSRNOG00000011329	Pkm	pyruvate kinase M1/2 [Source:RGD Symbol;Acc:3337]	protein_coding	1460	33.1166	1094	30.1137
ENSRNOG00000030199	Tmem192	transmembrane protein 192 [Source:MGI Symbol;Acc:MGI:1920317]	protein_coding	1668	32.9472	304	6.55558
ENSRNOG00000018645	Rpsa	ribosomal protein SA [Source:RGD Symbol;Acc:71026]	protein_coding	738	32.4764	3527	169.697
ENSRNOG00000049075	Fabp5	fatty acid binding protein 5 [Source:RGD Symbol;Acc:70997]	protein_coding	515	31.8918	1051	71.0748
ENSRNOG00000024808	Stk39	serine threonine kinase 39 [Source:RGD Symbol;Acc:621643]	protein_coding	2505	31.6398	2036	28.1148
ENSRNOG00000013250	Pdcd5	programmed cell death 5 [Source:RGD Symbol;Acc:1310561]	protein_coding	463	31.513	0	0
ENSRNOG00000001815	Eif4a2	eukaryotic translation initiation factor 4A2 [Source:RGD Symbol;Acc:1309225]	protein_coding	1320	31.445	1424	37.4645
ENSRNOG00000029466	RGD1562608	similar to KIAA1328 protein [Source:RGD Symbol;Acc:1562608]	protein_coding	1804	31.2347	318	6.37601
ENSRNOG00000043114	Tomm7	translocase of outer mitochondrial membrane 7 [Source:RGD Symbol;Acc:1591393]	protein_coding	263	31.2082	465	60.4635
ENSRNOG00000032882	AY172581.19		Mt_tRNA	48	31.0254	29	20.5183
ENSRNOG00000005184	Nop10	NOP10 ribonucleoprotein [Source:RGD Symbol;Acc:1582780]	protein_coding	590	30.7476	1351	77.0157
ENSRNOG00000058677	Lsm8	LSM8 homolog, U6 small nuclear RNA associated [Source:RGD Symbol;Acc:1308442]	protein_coding	546	30.6557	221	13.5151
ENSRNOG00000019321	Cck	cholecystokinin [Source:RGD Symbol;Acc:2288]	protein_coding	674	30.5668	379	18.7582
ENSRNOG00000034182	LOC100361934	NADH dehydrogenase (ubiquinone) 1 beta subcomplex 4 [Source:RGD Symbol;Acc:2319146]	protein_coding	269	30.5388	51	6.31115
ENSRNOG00000010768	Kpna4	karyopherin subunit alpha 4 [Source:RGD Symbol;Acc:1311483]	protein_coding	1335	29.6303	440	10.6608
ENSRNOG00000016530	Nsa2	NSA2 ribosome biogenesis factor [Source:RGD Symbol;Acc:621335]	protein_coding	684	29.0836	1868	86.8614
ENSRNOG00000039783	AC094217.1		protein_coding	285	29.0437	448	49.9814
ENSRNOG00000009402	Rabgap1	RAB GTPase activating protein 1 [Source:RGD Symbol;Acc:1304691]	protein_coding	3250	29.0155	1742	16.9985
ENSRNOG00000018630	Gapdh	glyceraldehyde-3-phosphate dehydrogenase [Source:RGD Symbol;Acc:2661]	protein_coding	647	28.8794	8283	404.533
ENSRNOG00000062155	AC134224.2		lincRNA	453	28.5715	8970	619.123
ENSRNOG00000027690	Eif3el1	eukaryotic translation initiation factor 3, subunit E-like 1 [Source:RGD Symbol;Acc:1311521]	protein_coding	850	28.4387	566	20.6974
ENSRNOG00000017723	Cept1	choline/ethanolamine phosphotransferase 1 [Source:RGD Symbol;Acc:1359727]	protein_coding	1339	28.2675	375	8.63756
ENSRNOG00000013884	Psd3	pleckstrin and Sec7 domain containing 3 [Source:RGD Symbol;Acc:1559968]	protein_coding	1973	28.1704	429	6.68727
ENSRNOG00000039249	AABR07035539.1	ribosomal protein L31-like 4 [Source:NCBI gene;Acc:100361974]	protein_coding	273	28.127	1061	119.612
ENSRNOG00000048268	AABR07015067.1		protein_coding	285	27.9596	2485	266.699
ENSRNOG00000010807	Cox6c	cytochrome c oxidase subunit 6C [Source:RGD Symbol;Acc:620616]	protein_coding	278	27.7479	797	87.0332
ENSRNOG00000000957	Rpl21	ribosomal protein L21 [Source:RGD Symbol;Acc:68390]	protein_coding	300	27.7373	8702	881.675
ENSRNOG00000003863	Trir	telomerase RNA component interacting RNase [Source:RGD Symbol;Acc:1564093]	protein_coding	550	27.6896	186	10.1959
ENSRNOG00000031579	LOC100363469	ribosomal protein S24-like [Source:RGD Symbol;Acc:2322976]	protein_coding	286	27.4741	1506	158.153
ENSRNOG00000010365	Syn1	synapsin I [Source:RGD Symbol;Acc:3797]	protein_coding	1917	27.1016	50	0.770633
ENSRNOG00000018816	Cox5a	cytochrome c oxidase subunit 5A [Source:RGD Symbol;Acc:620607]	protein_coding	363	27.0468	827	67.403
ENSRNOG00000048993	Metazoa_SRP	Metazoan signal recognition particle RNA [Source:RFAM;Acc:RF00017]	misc_RNA	182	27.0364	350	56.799
ENSRNOG00000010524	Cryab	crystallin, alpha B [Source:RGD Symbol;Acc:2414]	protein_coding	752	26.971	13284	520.922
ENSRNOG00000000517	Kctd20	potassium channel tetramerization domain containing 20 [Source:RGD Symbol;Acc:1309887]	protein_coding	871	26.9223	129	4.98587
ENSRNOG00000021528	Tusc2	tumor suppressor 2, mitochondrial calcium regulator [Source:RGD Symbol;Acc:1561664]	protein_coding	1231	26.7573	451	10.7073
ENSRNOG00000017466	Kif5b	kinesin family member 5B [Source:RGD Symbol;Acc:621559]	protein_coding	1952	26.1911	15817	231.959
ENSRNOG00000008604	Nsfl1c	NSFL1 cofactor [Source:RGD Symbol;Acc:619952]	protein_coding	830	26.164	1062	36.6127
ENSRNOG00000052113	Ppp1r9b	protein phosphatase 1, regulatory subunit 9B [Source:RGD Symbol;Acc:632281]	protein_coding	2605	25.8654	828	8.97643
ENSRNOG00000053502	Arhgef17	Rho guanine nucleotide exchange factor (GEF) 17 [Source:MGI Symbol;Acc:MGI:2673002]	protein_coding	3557	25.797	966	7.65291
ENSRNOG00000036921	LOC100364435	thymosin, beta 10-like [Source:RGD Symbol;Acc:2321025]	protein_coding	78	25.5904	70	25.0742
ENSRNOG00000017536	Cdc16	cell division cycle 16 [Source:RGD Symbol;Acc:1305076]	protein_coding	315	25.4297	347	8.68972
ENSRNOG00000000869	Arhgef6	Rac/Cdc42 guanine nucleotide exchange factor 6 [Source:RGD Symbol;Acc:1359674]	protein_coding	1567	25.1849	479	8.40365
ENSRNOG00000047365	LOC687780	similar to Finkel-Biskis-Reilly murine sarcoma virusubiquitously expressed [Source:RGD Symbol;Acc:1597505]	protein_coding	226	25.1532	185	22.4763
ENSRNOG00000046393	LOC100360647	ubiquitin-like protein fubi and ribosomal protein S30-like [Source:RGD Symbol;Acc:2321710]	protein_coding	224	24.8448	177	21.5024
ENSRNOG00000010319	Lcp1	lymphocyte cytosolic protein 1 [Source:RGD Symbol;Acc:1308288]	protein_coding	1876	24.6451	1922	27.5829
ENSRNOG00000018393	Uts2	urotensin 2 [Source:RGD Symbol;Acc:3930]	protein_coding	295	24.4981	106	9.54165
ENSRNOG00000013372	Shisal2b	shisa like 2B [Source:RGD Symbol;Acc:1564672]	protein_coding	263	24.477	0	0
ENSRNOG00000033957	AY172581.23		Mt_tRNA	38	24.4474	15	10.1095
ENSRNOG00000036816	Wls	Wnt ligand secretion mediator [Source:RGD Symbol;Acc:735139]	protein_coding	2164	23.8969	1235	19.9667
ENSRNOG00000062143	LOC100911830	tubulin alpha-1C chain-like [Source:RGD Symbol;Acc:6490604]	processed_pseudogene	725	23.8664	679	24.4329
ENSRNOG00000012495	Podxl	podocalyxin-like [Source:RGD Symbol;Acc:621878]	protein_coding	2794	23.6921	598	5.53047
ENSRNOG00000005668	Ndufa8	NADH:ubiquinone oxidoreductase subunit A8 [Source:RGD Symbol;Acc:1306283]	protein_coding	458	23.5647	1021	57.402
ENSRNOG00000009080	Atp6v1d	ATPase H+ transporting V1 subunit D [Source:RGD Symbol;Acc:735119]	protein_coding	674	23.3158	894	33.8117
ENSRNOG00000018651	Agtpbp1	ATP/GTP binding protein 1 [Source:RGD Symbol;Acc:1306307]	protein_coding	2310	23.0527	1295	14.1206
ENSRNOG00000048701	LOC682793	similar to 60S ribosomal protein L38 [Source:RGD Symbol;Acc:1595250]	protein_coding	109	22.7924	67	15.3654
ENSRNOG00000031667	AY172581.11		Mt_tRNA	36	22.5162	9	5.73033
ENSRNOG00000029377	LOC690468	similar to 60S ribosomal protein L38 [Source:RGD Symbol;Acc:1596041]	protein_coding	107	22.414	53	12.115
ENSRNOG00000002833	Gsk3b	glycogen synthase kinase 3 beta [Source:RGD Symbol;Acc:70982]	protein_coding	942	22.3861	1655	51.1615
ENSRNOG00000018320	Rps15a	ribosomal protein S15a [Source:RGD Symbol;Acc:619939]	protein_coding	417	22.0601	2885	345.522
ENSRNOG00000043098	Mt2A	metallothionein 2A [Source:RGD Symbol;Acc:1592345]	protein_coding	187	21.897	325	41.5657
ENSRNOG00000017428	Map1b	microtubule-associated protein 1B [Source:RGD Symbol;Acc:3043]	protein_coding	5700	21.5065	32005	132
ENSRNOG00000023593	Upf2	UPF2, regulator of nonsense mediated mRNA decay [Source:RGD Symbol;Acc:1309178]	protein_coding	1817	21.2928	1191	28.4089
ENSRNOG00000014382	C2cd5	C2 calcium-dependent domain containing 5 [Source:RGD Symbol;Acc:1304592]	protein_coding	2142	21.1605	156	1.72956
ENSRNOG00000002721	Ndufb4	NADH:ubiquinone oxidoreductase subunit B4 [Source:RGD Symbol;Acc:1307072]	protein_coding	212	20.8624	437	47.0414
ENSRNOG00000006833	Rb1cc1	RB1-inducible coiled-coil 1 [Source:RGD Symbol;Acc:1309346]	protein_coding	3272	20.3566	1892	12.8627
ENSRNOG00000010362	Anxa2	annexin A2 [Source:RGD Symbol;Acc:621170]	protein_coding	624	20.2952	3084	109.666
ENSRNOG00000057042	Pcca	propionyl-CoA carboxylase subunit alpha [Source:RGD Symbol;Acc:3264]	protein_coding	1003	20.2684	836	18.4675
ENSRNOG00000005564	Ubn2	ubinuclein 2 [Source:RGD Symbol;Acc:1310722]	protein_coding	2255	19.7896	1885	18.0836
ENSRNOG00000010210	Slc7a11	solute carrier family 7 member 11 [Source:RGD Symbol;Acc:1309275]	protein_coding	3915	19.706	1388	7.63488
ENSRNOG00000019400	Dag1	dystroglycan 1 [Source:RGD Symbol;Acc:621890]	protein_coding	2271	19.6125	9660	91.1881
ENSRNOG00000018414	Csf1r	colony stimulating factor 1 receptor [Source:RGD Symbol;Acc:2425]	protein_coding	1388	19.3831	4698	63.6354
ENSRNOG00000020151	Cdh1	cadherin 1 [Source:RGD Symbol;Acc:69279]	protein_coding	1865	18.9961	4579	50.9725
ENSRNOG00000037607	Rplp2	ribosomal protein lateral stalk subunit P2 [Source:RGD Symbol;Acc:621775]	protein_coding	148	18.9678	1236	173.741
ENSRNOG00000011905	Atp6v1e1	ATPase H+ transporting V1 subunit E1 [Source:RGD Symbol;Acc:735157]	protein_coding	562	18.8833	296	10.8602
ENSRNOG00000018069	Ngdn	neuroguidin [Source:RGD Symbol;Acc:1310211]	protein_coding	506	18.8364	143	5.78163
ENSRNOG00000018106	Neu3	neuraminidase 3 [Source:RGD Symbol;Acc:619881]	protein_coding	964	18.8346	0	0
ENSRNOG00000038375	AABR07026311.1		pseudogene	340	18.8156	123	7.43986
ENSRNOG00000018586	Retreg2	reticulophagy regulator family member 2 [Source:RGD Symbol;Acc:1306844]	protein_coding	1067	18.7903	449	8.64241
ENSRNOG00000002116	LOC100911575	60S acidic ribosomal protein P2-like [Source:RGD Symbol;Acc:6491911]	protein_coding	145	18.6125	1016	142.775
ENSRNOG00000034007	Nr3c2	nuclear receptor subfamily 3, group C, member 2 [Source:RGD Symbol;Acc:3094]	protein_coding	1081	18.3812	420	7.80249
ENSRNOG00000018691	Ccnl2	cyclin L2 [Source:RGD Symbol;Acc:1309149]	protein_coding	314	18.3109	949	53.83
ENSRNOG00000028939	Rps29	ribosomal protein S29 [Source:RGD Symbol;Acc:3596]	protein_coding	124	18.1975	808	130.372
ENSRNOG00000029389	AY172581.5		Mt_tRNA	28	18.1962	7	4.56774
ENSRNOG00000012563	Arhgap29	Rho GTPase activating protein 29 [Source:RGD Symbol;Acc:1306185]	protein_coding	2238	17.8987	3908	34.1658
ENSRNOG00000004629	Fkbp3	FKBP prolyl isomerase 3 [Source:RGD Symbol;Acc:1304992]	protein_coding	469	17.6937	1553	64.1267
ENSRNOG00000001707	Vwa5b2	von Willebrand factor A domain containing 5B2 [Source:RGD Symbol;Acc:1564491]	protein_coding	1766	17.53	363	3.93003
ENSRNOG00000011014	Copg2	coatomer protein complex, subunit gamma 2 [Source:RGD Symbol;Acc:1566215]	protein_coding	1014	17.3628	480	8.97713
ENSRNOG00000007967	Sdhb	succinate dehydrogenase complex iron sulfur subunit B [Source:RGD Symbol;Acc:1308598]	protein_coding	378	17.2498	372	18.5366
ENSRNOG00000027596	Mbd5	methyl-CpG binding domain protein 5 [Source:RGD Symbol;Acc:1562961]	protein_coding	2253	16.9844	1137	11.5234
ENSRNOG00000009505	Cd164l2	CD164 molecule like 2 [Source:RGD Symbol;Acc:2323068]	protein_coding	322	16.8478	0	0
ENSRNOG00000019219	Vamp1	vesicle-associated membrane protein 1 [Source:RGD Symbol;Acc:3948]	protein_coding	991	16.8403	297	5.51525
ENSRNOG00000022490	LOC100361008	Cytochrome c oxidase subunit 5A, mitochondrial-like [Source:RGD Symbol;Acc:2320952]	processed_pseudogene	165	16.8279	62	6.84639
ENSRNOG00000030019	Atp1a1	ATPase Na+/K+ transporting subunit alpha 1 [Source:RGD Symbol;Acc:2167]	protein_coding	1355	16.6791	3897	52.4264
ENSRNOG00000017817	Cox4i1	cytochrome c oxidase subunit 4i1 [Source:RGD Symbol;Acc:68374]	protein_coding	271	16.5673	945	63.2583
ENSRNOG00000019048	Sod2	superoxide dismutase 2 [Source:RGD Symbol;Acc:3732]	protein_coding	759	16.4598	731	17.3202
ENSRNOG00000020982	Fau	FAU, ubiquitin like and ribosomal protein S30 fusion [Source:RGD Symbol;Acc:61938]	protein_coding	209	16.3451	2254	192.798
ENSRNOG00000031127	Snrpe	small nuclear ribonucleoprotein polypeptide E [Source:RGD Symbol;Acc:2321675]	protein_coding	152	16.2783	68	7.90144
ENSRNOG00000003545	Uchl5	ubiquitin C-terminal hydrolase L5 [Source:RGD Symbol;Acc:1305414]	protein_coding	607	16.2358	121	3.90309
ENSRNOG00000025768	Clk1	CDC-like kinase 1 [Source:RGD Symbol;Acc:1311469]	protein_coding	644	16.2331	782	21.5599
ENSRNOG00000019244	Mxra8	matrix remodeling associated 8 [Source:RGD Symbol;Acc:1359356]	protein_coding	822	16.2309	2495	54.0849
ENSRNOG00000021202	Rtn3	reticulon 3 [Source:RGD Symbol;Acc:620988]	protein_coding	1741	15.8916	2822	50.1536
ENSRNOG00000052730	Psmb3	proteasome subunit beta 3 [Source:RGD Symbol;Acc:61875]	protein_coding	291	15.793	494	29.2951
ENSRNOG00000042821	Cd59	CD59 molecule [Source:RGD Symbol;Acc:2311]	protein_coding	518	15.6149	4671	154.025
ENSRNOG00000054493	Rpph1	ribonuclease P RNA component H1 [Source:RGD Symbol;Acc:3580]	ribozyme	104	15.5668	3508	576.023
ENSRNOG00000057765	AABR07034457.1		lincRNA	142	15.4732	9	0.965904
ENSRNOG00000008103	Mdh1	malate dehydrogenase 1 [Source:RGD Symbol;Acc:3072]	protein_coding	453	15.4168	1727	64.3683
ENSRNOG00000010957	Braf	B-Raf proto-oncogene, serine/threonine kinase [Source:RGD Symbol;Acc:619908]	protein_coding	810	15.3296	435	8.99391
ENSRNOG00000016280	Btrc	beta-transducin repeat containing E3 ubiquitin protein ligase [Source:RGD Symbol;Acc:1359721]	protein_coding	2062	15.2885	152	1.22801
ENSRNOG00000060098	Ptms	parathymosin [Source:RGD Symbol;Acc:621529]	protein_coding	383	15.0618	6921	298.16
ENSRNOG00000005726	Pclo	piccolo (presynaptic cytomatrix protein) [Source:RGD Symbol;Acc:69406]	protein_coding	5543	15.0586	987	2.92883
ENSRNOG00000023661	Celf2	CUGBP, Elav-like family member 2 [Source:RGD Symbol;Acc:68347]	protein_coding	547	15.0372	1227	36.8571
ENSRNOG00000049497	Eif6	eukaryotic translation initiation factor 6 [Source:RGD Symbol;Acc:1305373]	protein_coding	411	15.0291	360	14.3888
ENSRNOG00000021104	Emp3	epithelial membrane protein 3 [Source:RGD Symbol;Acc:621094]	protein_coding	243	14.8937	333	22.3079
ENSRNOG00000021224	Mrps26	mitochondrial ribosomal protein S26 [Source:RGD Symbol;Acc:1308733]	protein_coding	319	14.7161	93	4.69787
ENSRNOG00000014208	Dctn3	dynactin subunit 3 [Source:RGD Symbol;Acc:1309547]	protein_coding	313	14.6393	902	46.1504
ENSRNOG00000009318	Ttll5	tubulin tyrosine ligase like 5 [Source:RGD Symbol;Acc:1563583]	protein_coding	1296	14.4352	722	8.78381
ENSRNOG00000024930	Smim19	small integral membrane protein 19 [Source:RGD Symbol;Acc:2318364]	protein_coding	798	14.4259	1287	25.437
ENSRNOG00000005116	LOC108350502	40S ribosomal protein S2 pseudogene [Source:RGD Symbol;Acc:11403788]	pseudogene	300	14.3588	815	42.7053
ENSRNOG00000036397	AABR07027722.1		miRNA	34	14.3098	1544	712.685
ENSRNOG00000007234	Cyp51	cytochrome P450, family 51 [Source:RGD Symbol;Acc:2481]	protein_coding	1065	14.2668	2417	35.3982
ENSRNOG00000028619	Hoxc8	homeobox C8 [Source:RGD Symbol;Acc:2821]	protein_coding	673	14.0545	926	21.1606
ENSRNOG00000004741	Rpl19	ribosomal protein L19 [Source:RGD Symbol;Acc:621183]	protein_coding	221	14.0498	3182	221.451
ENSRNOG00000047988	Bola2	bolA family member 2 [Source:RGD Symbol;Acc:1565363]	protein_coding	223	13.8263	1778	120.488
ENSRNOG00000019354	Ptch1	patched 1 [Source:RGD Symbol;Acc:621425]	protein_coding	2272	13.8239	14187	124.885
ENSRNOG00000001489	Tbp	TATA box binding protein [Source:RGD Symbol;Acc:67398]	protein_coding	576	13.7967	181	4.72117
ENSRNOG00000011517	Tnfrsf21	TNF receptor superfamily member 21 [Source:RGD Symbol;Acc:1307308]	protein_coding	1335	13.7397	1573	17.6944
ENSRNOG00000030871	Calm2	calmodulin 2 [Source:NCBI gene;Acc:50663]	protein_coding	336	13.7172	328	14.6203
ENSRNOG00000059705	Elmo1	engulfment and cell motility 1 [Source:RGD Symbol;Acc:1308182]	protein_coding	681	13.6636	967	21.2103
ENSRNOG00000010031	Vtn	vitronectin [Source:RGD Symbol;Acc:3967]	protein_coding	496	13.6437	6091	183.419
ENSRNOG00000031802	LOC691427	similar to 6.8 kDa mitochondrial proteolipid [Source:RGD Symbol;Acc:1583946]	protein_coding	56	13.6305	143	38.1512
ENSRNOG00000001551	Atp5pf	ATP synthase peripheral stalk subunit F6 [Source:RGD Symbol;Acc:621376]	protein_coding	277	13.6252	1958	105.418
ENSRNOG00000010830	Slc25a4	solute carrier family 25 member 4 [Source:RGD Symbol;Acc:620352]	protein_coding	388	13.4477	3292	124.856
ENSRNOG00000049437	Gpc1	glypican 1 [Source:RGD Symbol;Acc:61853]	protein_coding	1038	13.3026	706	9.88609
ENSRNOG00000011927	Sdc3	syndecan 3 [Source:RGD Symbol;Acc:621486]	protein_coding	1437	13.2916	1832	18.5122
ENSRNOG00000015967	Sh3bgrl3	SH3 domain binding glutamate-rich protein like 3 [Source:RGD Symbol;Acc:1308118]	protein_coding	224	13.2493	734	47.5269
ENSRNOG00000020674	Rpl27	ribosomal protein L27 [Source:RGD Symbol;Acc:621192]	protein_coding	141	13.1857	2032	208.871
ENSRNOG00000021081	Vps72	vacuolar protein sorting 72 homolog [Source:RGD Symbol;Acc:1306121]	protein_coding	399	13.1496	71	2.52989
ENSRNOG00000010189	Rps24	ribosomal protein S24 [Source:RGD Symbol;Acc:621040]	protein_coding	201	13.1108	4071	363.882
ENSRNOG00000001417	Plod3	procollagen-lysine, 2-oxoglutarate 5-dioxygenase 3 [Source:RGD Symbol;Acc:631339]	protein_coding	799	13.0007	252	4.47319
ENSRNOG00000021177	Cox8a	cytochrome c oxidase subunit 8A [Source:RGD Symbol;Acc:620638]	protein_coding	143	12.9103	1801	178.046
ENSRNOG00000015018	Pdia3	protein disulfide isomerase family A, member 3 [Source:RGD Symbol;Acc:68430]	protein_coding	542	12.8915	5069	131.86
ENSRNOG00000047089	Alkbh7	alkB homolog 7 [Source:RGD Symbol;Acc:1598126]	protein_coding	285	12.8418	84	4.11933
ENSRNOG00000005828	Skp1	S-phase kinase-associated protein 1 [Source:RGD Symbol;Acc:1359648]	protein_coding	415	12.7771	2928	118.021
ENSRNOG00000036301	AC128792.1		miRNA	31	12.7612	1383	638.457
ENSRNOG00000005478	Fkbp9	FKBP prolyl isomerase 9 [Source:RGD Symbol;Acc:1549757]	protein_coding	856	12.7544	2265	36.8883
ENSRNOG00000056765	Rpl10	ribosomal protein L10 [Source:RGD Symbol;Acc:621178]	protein_coding	218	12.7266	12242	783.153
ENSRNOG00000054140	Myl6	myosin light chain 6 [Source:RGD Symbol;Acc:1589019]	protein_coding	191	12.7093	4880	355.364
ENSRNOG00000017405	Raly	RALY heterogeneous nuclear ribonucleoprotein [Source:RGD Symbol;Acc:1307228]	protein_coding	398	12.7051	769	27.1864
ENSRNOG00000007975	Ncoa2	nuclear receptor coactivator 2 [Source:RGD Symbol;Acc:620108]	protein_coding	1246	12.6814	588	6.53266
ENSRNOG00000004794	Rtn1	reticulon 1 [Source:RGD Symbol;Acc:620986]	protein_coding	421	12.5986	797	26.0011
ENSRNOG00000046109	LOC689574	hypothetical protein LOC689574 [Source:RGD Symbol;Acc:1591053]	protein_coding	214	12.5824	407	26.1989
ENSRNOG00000057527	RNase_MRP	RNase MRP [Source:RFAM;Acc:RF00030]	ribozyme	77	12.5529	6316	1136.24
ENSRNOG00000042419	Acyp2	acylphosphatase 2 [Source:RGD Symbol;Acc:1595836]	protein_coding	320	12.5507	100	4.29332
ENSRNOG00000013804	Exoc5	exocyst complex component 5 [Source:RGD Symbol;Acc:708408]	protein_coding	1211	12.5156	1297	14.6593
ENSRNOG00000010977	Igfbp6	insulin-like growth factor binding protein 6 [Source:RGD Symbol;Acc:2877]	protein_coding	298	12.4761	8868	405.971
ENSRNOG00000004814	Elob	elongin B [Source:RGD Symbol;Acc:621200]	protein_coding	126	12.4174	669	83.0388
ENSRNOG00000001331	Rnf34	ring finger protein 34 [Source:RGD Symbol;Acc:628636]	protein_coding	543	12.3935	346	8.62044
ENSRNOG00000001148	Rplp0	ribosomal protein lateral stalk subunit P0 [Source:RGD Symbol;Acc:621247]	protein_coding	302	12.3378	10272	459.937
ENSRNOG00000014532	Lbp	lipopolysaccharide binding protein [Source:RGD Symbol;Acc:61865]	protein_coding	661	12.182	141	2.82944
ENSRNOG00000036432	AABR07008505.1		miRNA	29	12.1416	1833	845.984
ENSRNOG00000005290	Ywhae	tyrosine 3-monooxygenase/tryptophan 5-monooxygenase activation protein, epsilon [Source:RGD Symbol;Acc:62000]	protein_coding	469	12.069	9445	265.941
ENSRNOG00000008001	Rab3b	RAB3B, member RAS oncogene family [Source:RGD Symbol;Acc:620922]	protein_coding	307	11.9499	125	5.31341
ENSRNOG00000024128	Aco2	aconitase 2 [Source:RGD Symbol;Acc:621360]	protein_coding	879	11.9327	2257	33.9496
ENSRNOG00000016272	Edf1	endothelial differentiation-related factor 1 [Source:RGD Symbol;Acc:1308073]	protein_coding	183	11.9273	1999	142.806
ENSRNOG00000005299	Kif5a	kinesin family member 5A [Source:RGD Symbol;Acc:1303035]	protein_coding	1575	11.8706	1744	14.7624
ENSRNOG00000019428	Higd1a	HIG1 hypoxia inducible domain family, member 1A [Source:RGD Symbol;Acc:620215]	protein_coding	404	11.8453	333	10.6803
ENSRNOG00000049302	Chd9	chromodomain helicase DNA binding protein 9 [Source:RGD Symbol;Acc:1306795]	protein_coding	2053	11.8005	876	11.9321
ENSRNOG00000010872	Ckb	creatine kinase B [Source:RGD Symbol;Acc:2357]	protein_coding	377	11.7952	1888	64.6358
ENSRNOG00000032542	LOC108352650	40S ribosomal protein S29 [Source:RGD Symbol;Acc:11376557]	protein_coding	45	11.7433	99	28.3156
ENSRNOG00000000622	Hint1	histidine triad nucleotide binding protein 1 [Source:RGD Symbol;Acc:1593411]	protein_coding	154	11.6785	202	16.6765
ENSRNOG00000038883	LOC294154	similar to chromosome 6 open reading frame 106 isoform a [Source:RGD Symbol;Acc:1559829]	protein_coding	860	11.6569	2867	42.4748
ENSRNOG00000028834	Polr2a	RNA polymerase II subunit A [Source:RGD Symbol;Acc:1587326]	protein_coding	1689	11.6093	2813	21.1373
ENSRNOG00000062141	Slc18a3	solute carrier family 18 member A3 [Source:RGD Symbol;Acc:62072]	protein_coding	738	11.5426	0	0
ENSRNOG00000001915	Chodl	chondrolectin [Source:RGD Symbol;Acc:1309885]	protein_coding	655	11.4623	42	0.799497
ENSRNOG00000049047	LOC682793	similar to 60S ribosomal protein L38 [Source:RGD Symbol;Acc:1595250]	protein_coding	55	11.455	93	21.2151
ENSRNOG00000022934	AABR07066818.1		protein_coding	204	11.3554	435	26.4693
ENSRNOG00000053909	7SK	7SK RNA [Source:RFAM;Acc:RF00100]	misc_RNA	74	11.2959	497	83.2124
ENSRNOG00000060441	U1	U1 spliceosomal RNA [Source:RFAM;Acc:RF00003]	snRNA	42	11.2882	1	0.073211
ENSRNOG00000014568	Ndufb10	NADH:ubiquinone oxidoreductase subunit B10 [Source:RGD Symbol;Acc:1310782]	protein_coding	172	11.2377	464	33.1866
ENSRNOG00000011969	Dock9	dedicator of cytokinesis 9 [Source:RGD Symbol;Acc:629617]	protein_coding	2338	11.1764	6367	34.431
ENSRNOG00000011295	Anapc2	anaphase promoting complex subunit 2 [Source:RGD Symbol;Acc:1305546]	protein_coding	665	11.069	544	9.88705
ENSRNOG00000004992	Rab1a	RAB1A, member RAS oncogene family [Source:RGD Symbol;Acc:619736]	protein_coding	347	11.0132	553	19.2203
ENSRNOG00000013468	Prxl2b	peroxiredoxin like 2B [Source:RGD Symbol;Acc:1308251]	protein_coding	215	10.9364	91	5.02237
ENSRNOG00000022792	Lamp3	lysosomal-associated membrane protein 3 [Source:RGD Symbol;Acc:1307928]	protein_coding	479	10.9319	6	0.130773
ENSRNOG00000005642	Frs2	fibroblast growth factor receptor substrate 2 [Source:RGD Symbol;Acc:1308201]	protein_coding	1596	10.8961	1438	10.7337
ENSRNOG00000006086	Lynx1	Ly6/neurotoxin 1 [Source:RGD Symbol;Acc:1312017]	protein_coding	918	10.8136	138	9.27011
ENSRNOG00000051920	U1	U1 spliceosomal RNA [Source:RFAM;Acc:RF00003]	snRNA	40	10.6916	1	0.073211
ENSRNOG00000051196	AABR07018038.1		protein_coding	603	10.6885	509	11.2112
ENSRNOG00000051166	AABR07021503.1		lincRNA	108	10.6466	56	5.67478
ENSRNOG00000032703	Rasgrp3	RAS guanyl releasing protein 3 [Source:RGD Symbol;Acc:1304612]	protein_coding	1020	10.6362	398	4.57688
ENSRNOG00000007788	Glod4	glyoxalase domain containing 4 [Source:RGD Symbol;Acc:1307010]	protein_coding	346	10.624	2291	76.9488
ENSRNOG00000034026	Lclat1	lysocardiolipin acyltransferase 1 [Source:RGD Symbol;Acc:1565906]	protein_coding	580	10.5842	175	3.4856
ENSRNOG00000008546	Mrpl35	mitochondrial ribosomal protein L35 [Source:RGD Symbol;Acc:1307065]	protein_coding	383	10.4945	1190	35.6797
ENSRNOG00000008414	Bsg	basigin (Ok blood group) [Source:RGD Symbol;Acc:2220]	protein_coding	390	10.4766	7565	273.448
ENSRNOG00000004829	Immp1l	inner mitochondrial membrane peptidase subunit 1 [Source:RGD Symbol;Acc:1587441]	protein_coding	295	10.4454	322	12.4928
ENSRNOG00000026661	Hcar1	hydroxycarboxylic acid receptor 1 [Source:RGD Symbol;Acc:1586364]	protein_coding	325	10.2464	364	12.5409
ENSRNOG00000061862	Zbtb10	zinc finger and BTB domain containing 10 [Source:RGD Symbol;Acc:708377]	protein_coding	873	10.1798	273	4.06103
ENSRNOG00000014316	Rapgef1	Rap guanine nucleotide exchange factor 1 [Source:RGD Symbol;Acc:619793]	protein_coding	943	10.1473	658	7.73334
ENSRNOG00000000190	AABR07058539.1		protein_coding	584	10.1187	480	9.08091
ENSRNOG00000005606	Med1	mediator complex subunit 1 [Source:RGD Symbol;Acc:1559552]	protein_coding	1303	10.0348	1512	12.7269
ENSRNOG00000031163	Nfkbiz	NFKB inhibitor zeta [Source:RGD Symbol;Acc:1310834]	protein_coding	490	9.89755	138	2.9937
ENSRNOG00000017939	Chn1	chimerin 1 [Source:RGD Symbol;Acc:620139]	protein_coding	669	9.87902	2231	36.0121
ENSRNOG00000016727	Akr1a1	aldo-keto reductase family 1 member A1 [Source:RGD Symbol;Acc:68346]	protein_coding	274	9.78877	2132	83.2707
ENSRNOG00000054722	U1	U1 spliceosomal RNA [Source:RFAM;Acc:RF00003]	snRNA	36	9.65097	0	0
ENSRNOG00000061348	Fam53b	family with sequence similarity 53, member B [Source:RGD Symbol;Acc:1310799]	protein_coding	1130	9.62564	251	2.56143
ENSRNOG00000030747	LOC685963	similar to 60S ribosomal protein L38 [Source:RGD Symbol;Acc:1587812]	protein_coding	65	9.60124	125	20.0991
ENSRNOG00000031760	Fmn1	formin 1 [Source:MGI Symbol;Acc:MGI:101815]	protein_coding	876	9.56132	371	4.41914
ENSRNOG00000013536	Cdc42	cell division cycle 42 [Source:RGD Symbol;Acc:71043]	protein_coding	196	9.46835	3247	172.114
ENSRNOG00000007336	Churc1	churchill domain containing 1 [Source:RGD Symbol;Acc:1305116]	protein_coding	100	9.46647	130	13.4428
ENSRNOG00000003510	Fmo2	flavin containing dimethylaniline monoxygenase 2 [Source:RGD Symbol;Acc:628600]	protein_coding	421	9.35877	1325	33.6129
ENSRNOG00000015619	Agfg1	ArfGAP with FG repeats 1 [Source:RGD Symbol;Acc:1560041]	protein_coding	416	9.34453	619	15.2225
ENSRNOG00000001440	Mdh2	malate dehydrogenase 2 [Source:RGD Symbol;Acc:619719]	protein_coding	275	9.30567	2295	85.1483
ENSRNOG00000010392	Nrg1	neuregulin 1 [Source:RGD Symbol;Acc:621341]	protein_coding	795	9.25827	230	3.30459
ENSRNOG00000012183	Glrx	glutaredoxin [Source:RGD Symbol;Acc:70951]	protein_coding	266	9.25765	200	7.5978
ENSRNOG00000059224	Reps1	RALBP1 associated Eps domain containing 1 [Source:RGD Symbol;Acc:1307131]	protein_coding	542	9.22856	649	12.0996
ENSRNOG00000020602	Ndufa13	NADH:ubiquinone oxidoreductase subunit A13 [Source:RGD Symbol;Acc:6492821]	protein_coding	97	9.18764	601	62.2675
ENSRNOG00000015703	Hypk	Huntingtin interacting protein K [Source:RGD Symbol;Acc:1311457]	protein_coding	78	8.94316	308	38.5514
ENSRNOG00000038951	Cox17	cytochrome c oxidase copper chaperone COX17 [Source:RGD Symbol;Acc:620548]	protein_coding	85	8.92004	295	34.1423
ENSRNOG00000048470	LOC100911238	proteasome maturation protein-like [Source:RGD Symbol;Acc:6494524]	protein_coding	140	8.89308	267	18.5255
ENSRNOG00000008140	Rpl15	ribosomal protein L15 [Source:RGD Symbol;Acc:621181]	protein_coding	369	8.8376	4841	127.024
ENSRNOG00000038106	AABR07026424.1	microtubule-associated protein 1 light chain 3 beta 2 [Source:NCBI gene;Acc:100359928]	protein_coding	126	8.79393	70	5.28801
ENSRNOG00000031439	AC117869.1		processed_pseudogene	84	8.67321	54	6.12378
ENSRNOG00000004951	Kif16b	kinesin family member 16B [Source:RGD Symbol;Acc:1310146]	protein_coding	1138	8.6413	542	4.49595
ENSRNOG00000016410	Prelid1	PRELI domain containing 1 [Source:RGD Symbol;Acc:1308082]	protein_coding	160	8.53997	809	35.9444
ENSRNOG00000000481	Cuta	cutA divalent cation tolerance homolog [Source:RGD Symbol;Acc:1303306]	protein_coding	117	8.53008	1314	99.0963
ENSRNOG00000007895	Pdhb	pyruvate dehydrogenase E1 beta subunit [Source:RGD Symbol;Acc:1359146]	protein_coding	340	8.50914	296	8.09712
ENSRNOG00000049007	LOC100911313	regulator of microtubule dynamics protein 3-like [Source:RGD Symbol;Acc:6493329]	protein_coding	171	8.50163	142	7.70856
ENSRNOG00000018273	Ncl	nucleolin [Source:RGD Symbol;Acc:3153]	protein_coding	489	8.46891	2649	50.1961
ENSRNOG00000017212	Spsb1	splA/ryanodine receptor domain and SOCS box containing 1 [Source:RGD Symbol;Acc:1309319]	protein_coding	530	8.43782	121	2.0963
ENSRNOG00000059449	Metazoa_SRP	Metazoan signal recognition particle RNA [Source:RFAM;Acc:RF00017]	misc_RNA	57	8.37209	73	11.8598
ENSRNOG00000061985	AABR07041237.1		TEC	186	8.35958	21	1.02073
ENSRNOG00000007527	Tm2d1	TM2 domain containing 1 [Source:RGD Symbol;Acc:1305442]	protein_coding	264	8.29834	406	13.9521
ENSRNOG00000010396	Eya3	EYA transcriptional coactivator and phosphatase 3 [Source:RGD Symbol;Acc:1309932]	protein_coding	392	8.2728	673	13.089
ENSRNOG00000055471	Ywhah	tyrosine 3-monooxygenase/tryptophan 5-monooxygenase activation protein, eta [Source:RGD Symbol;Acc:3978]	protein_coding	311	8.23865	2342	67.9875
ENSRNOG00000021125	Prdx5	peroxiredoxin 5 [Source:RGD Symbol;Acc:71007]	protein_coding	148	8.09572	318	19.0574
ENSRNOG00000058444	Hist1h2ao	histone cluster 1, H2ao [Source:RGD Symbol;Acc:1304905]	protein_coding	57	8.07422	178	27.8286
ENSRNOG00000040273	RGD1562402	similar to 60S ribosomal protein L27a [Source:RGD Symbol;Acc:1562402]	protein_coding	80	8.06592	192	21.0837
ENSRNOG00000034254	Actb	actin, beta [Source:RGD Symbol;Acc:628837]	protein_coding	227	8.02877	10794	418.167
ENSRNOG00000029941	Grina	glutamate ionotropic receptor NMDA type subunit associated protein 1 [Source:RGD Symbol;Acc:628873]	protein_coding	317	7.99202	1811	49.9871
ENSRNOG00000003329	Ppm1d	protein phosphatase, Mg2+/Mn2+ dependent, 1D [Source:RGD Symbol;Acc:1305460]	protein_coding	519	7.98321	708	11.8948
ENSRNOG00000051965	Smad4	SMAD family member 4 [Source:RGD Symbol;Acc:3033]	protein_coding	364	7.96683	1051	25.1877
ENSRNOG00000002575	Sap30l	SAP30-like [Source:RGD Symbol;Acc:1309585]	protein_coding	98	7.91891	203	18.0439
ENSRNOG00000006248	Trim37	tripartite motif-containing 37 [Source:RGD Symbol;Acc:1308349]	protein_coding	612	7.91483	243	3.49369
ENSRNOG00000013326	Hmbox1	homeobox containing 1 [Source:RGD Symbol;Acc:1306787]	protein_coding	229	7.88028	242	9.10488
ENSRNOG00000060332	7SK	7SK RNA [Source:RFAM;Acc:RF00100]	misc_RNA	52	7.82895	417	69.1229
ENSRNOG00000037220	AABR07031089.1		protein_coding	156	7.80122	833	45.7331
ENSRNOG00000046996	Pea15	proliferation and apoptosis adaptor protein 15 [Source:RGD Symbol;Acc:1306055]	protein_coding	402	7.79945	51253	1088.68
ENSRNOG00000054118	Tpgs2	tubulin polyglutamylase complex subunit 2 [Source:RGD Symbol;Acc:1310571]	protein_coding	424	7.78884	310	6.22254
ENSRNOG00000032803	Rpl21	ribosomal protein L21 [Source:RGD Symbol;Acc:68390]	protein_coding	97	7.77737	2915	257.484
ENSRNOG00000050200	Kdm3b	lysine demethylase 3B [Source:RGD Symbol;Acc:1583423]	protein_coding	1119	7.73048	3023	22.8335
ENSRNOG00000046283	Tmem41a	transmembrane protein 41a [Source:RGD Symbol;Acc:1591692]	protein_coding	273	7.73037	95	2.92148
ENSRNOG00000056040	AABR07045680.1		lincRNA	137	7.69755	52	4.58969
ENSRNOG00000026907	Zbtb37	zinc finger and BTB domain containing 37 [Source:RGD Symbol;Acc:1308731]	protein_coding	408	7.68808	228	4.70075
ENSRNOG00000031709	Ppfibp1	PPFIA binding protein 1 [Source:RGD Symbol;Acc:1310010]	protein_coding	844	7.59983	2566	26.2484
ENSRNOG00000025730	Armcx3	armadillo repeat containing, X-linked 3 [Source:RGD Symbol;Acc:1549739]	protein_coding	329	7.59413	1358	33.4252
ENSRNOG00000010784	Scg3	secretogranin III [Source:RGD Symbol;Acc:621209]	protein_coding	363	7.58091	48	1.0838
ENSRNOG00000007330	Capzb	capping actin protein of muscle Z-line subunit beta [Source:RGD Symbol;Acc:1359099]	protein_coding	274	7.56345	2501	75.5379
ENSRNOG00000058898	Nedd4	neural precursor cell expressed, developmentally down-regulated 4, E3 ubiquitin protein ligase [Source:RGD Symbol;Acc:3157]	protein_coding	897	7.50218	26383	241.381
ENSRNOG00000001316	Anapc5	anaphase-promoting complex subunit 5 [Source:RGD Symbol;Acc:1306125]	protein_coding	408	7.49204	1246	25.0514
ENSRNOG00000000327	Hace1	HECT domain and ankyrin repeat containing, E3 ubiquitin protein ligase 1 [Source:RGD Symbol;Acc:1306114]	protein_coding	572	7.43855	130	1.83567
ENSRNOG00000061040	Herc4	HECT and RLD domain containing E3 ubiquitin protein ligase 4 [Source:RGD Symbol;Acc:1310971]	protein_coding	630	7.34886	239	3.04822
ENSRNOG00000049681	AABR07031491.2		protein_coding	356	7.33919	2429	54.8265
ENSRNOG00000027929	Poln	DNA polymerase nu [Source:RGD Symbol;Acc:7675413]	protein_coding	424	7.32051	5	0.087584
ENSRNOG00000018935	RGD1560015	similar to glycoprotein, synaptic 2 [Source:RGD Symbol;Acc:1560015]	pseudogene	173	7.30751	626	28.9545
ENSRNOG00000002693	Nme1	NME/NM23 nucleoside diphosphate kinase 1 [Source:RGD Symbol;Acc:70497]	protein_coding	119	7.23284	129	8.55022
ENSRNOG00000016443	Vps13d	vacuolar protein sorting 13 homolog D [Source:RGD Symbol;Acc:1308403]	protein_coding	2448	7.21226	2280	7.38951
ENSRNOG00000061908	7SK	7SK RNA [Source:RFAM;Acc:RF00100]	misc_RNA	48	7.20141	400	66.7464
ENSRNOG00000012156	Ostf1	osteoclast stimulating factor 1 [Source:RGD Symbol;Acc:628849]	protein_coding	189	7.18484	708	29.4896
ENSRNOG00000018569	Ahcyl1	adenosylhomocysteinase-like 1 [Source:RGD Symbol;Acc:1309768]	protein_coding	552	7.18397	3931	74.8536
ENSRNOG00000019432	Lypd5	Ly6/Plaur domain containing 5 [Source:RGD Symbol;Acc:1560355]	protein_coding	229	7.10998	0	0
ENSRNOG00000018848	Eif1b	eukaryotic translation initiation factor 1B [Source:RGD Symbol;Acc:1309241]	protein_coding	147	7.10799	442	23.4381
ENSRNOG00000011059	Ttbk2	tau tubulin kinase 2 [Source:RGD Symbol;Acc:1311661]	protein_coding	670	7.01319	594	6.79376
ENSRNOG00000027089	Ell2	elongation factor for RNA polymerase II 2 [Source:RGD Symbol;Acc:1309296]	protein_coding	358	6.94737	677	14.3674
ENSRNOG00000006853	Elavl2	ELAV like RNA binding protein 2 [Source:RGD Symbol;Acc:628611]	protein_coding	642	6.92146	130	1.52961
ENSRNOG00000059109	U1	U1 spliceosomal RNA [Source:RFAM;Acc:RF00003]	snRNA	26	6.90974	1	0.076394
ENSRNOG00000004709	Foxn3	forkhead box N3 [Source:RGD Symbol;Acc:1305711]	protein_coding	563	6.87298	459	13.098
ENSRNOG00000008822	Fkbp1a	FKBP prolyl isomerase 1A [Source:RGD Symbol;Acc:2617]	protein_coding	230	6.85405	5336	174.418
ENSRNOG00000011130	Calca	calcitonin-related polypeptide alpha [Source:RGD Symbol;Acc:2254]	protein_coding	146	6.70143	278	13.9193
ENSRNOG00000004806	Strn	striatin [Source:RGD Symbol;Acc:3782]	protein_coding	458	6.67403	813	12.9427
ENSRNOG00000027341	Tenm2	teneurin transmembrane protein 2 [Source:RGD Symbol;Acc:727907]	protein_coding	1385	6.6466	6839	35.8801
ENSRNOG00000020710	Raver1	ribonucleoprotein, PTB-binding 1 [Source:RGD Symbol;Acc:1359190]	protein_coding	509	6.61583	626	8.89288
ENSRNOG00000028426	Mcf2l	MCF.2 cell line derived transforming sequence-like [Source:RGD Symbol;Acc:619782]	protein_coding	672	6.59277	209	1.89817
ENSRNOG00000046806	AABR07057233.1		miRNA	10	6.46592	5	3.14131
ENSRNOG00000014443	Pde5a	phosphodiesterase 5A [Source:RGD Symbol;Acc:620995]	protein_coding	491	6.46536	344	4.95402
ENSRNOG00000051235	C2	complement C2 [Source:RGD Symbol;Acc:2231]	protein_coding	373	6.40154	739	13.8736
ENSRNOG00000003343	Canx	calnexin [Source:RGD Symbol;Acc:2266]	protein_coding	712	6.39104	5841	57.3234
ENSRNOG00000046252	Tbl2	transducin (beta)-like 2 [Source:RGD Symbol;Acc:1595038]	protein_coding	606	6.38701	730	8.41633
ENSRNOG00000003139	Smc1a	structural maintenance of chromosomes 1A [Source:RGD Symbol;Acc:61991]	protein_coding	522	6.30671	1141	15.0825
ENSRNOG00000053164	U6	U6 spliceosomal RNA [Source:RFAM;Acc:RF00026]	snRNA	14	6.3061	0	0
ENSRNOG00000020527	Drap1	Dr1 associated protein 1 [Source:RGD Symbol;Acc:1308477]	protein_coding	198	6.29766	253	8.77745
ENSRNOG00000055484	AABR07033465.1		pseudogene	27	6.27656	109	27.697
ENSRNOG00000058108	7SK	7SK RNA [Source:RFAM;Acc:RF00100]	misc_RNA	38	6.18406	265	47.6201
ENSRNOG00000048545	LOC100910483	ankyrin repeat domain-containing protein 12-like [Source:RGD Symbol;Acc:6498319]	protein_coding	170	6.18218	117	4.66319
ENSRNOG00000033932	AY172581.22		Mt_tRNA	10	6.15198	20	13.5046
ENSRNOG00000004050	Snrk	SNF related kinase [Source:RGD Symbol;Acc:69653]	protein_coding	356	6.13184	488	8.20835
ENSRNOG00000058003	Spon1	spondin 1 [Source:RGD Symbol;Acc:619918]	protein_coding	560	6.11949	3973	48.0556
ENSRNOG00000014434	Chd1	chromodomain helicase DNA binding protein 1 [Source:RGD Symbol;Acc:1306794]	protein_coding	705	6.07632	487	4.59058
ENSRNOG00000014779	Pdcd4	programmed cell death 4 [Source:RGD Symbol;Acc:620816]	protein_coding	324	6.04418	5393	110.018
ENSRNOG00000010846	Ccdc22	coiled-coil domain containing 22 [Source:RGD Symbol;Acc:1560910]	protein_coding	347	6.0402	239	4.53322
ENSRNOG00000043451	Spp1	secreted phosphoprotein 1 [Source:RGD Symbol;Acc:3752]	protein_coding	196	5.978	3003	100.883
ENSRNOG00000038610	AABR07034445.1		protein_coding	134	5.96952	1005	49.0747
ENSRNOG00000010150	Strbp	spermatid perinuclear RNA binding protein [Source:RGD Symbol;Acc:620673]	protein_coding	408	5.9582	487	9.71607
ENSRNOG00000011160	AC126641.1	synaptic vesicle glycoprotein 2b [Source:NCBI gene;Acc:117556]	processed_transcript	691	5.94881	322	3.02532
ENSRNOG00000054669	RGD1305110	similar to KIAA1841 protein [Source:RGD Symbol;Acc:1305110]	protein_coding	311	5.88102	212	4.37338
ENSRNOG00000016206	Uvrag	UV radiation resistance associated [Source:RGD Symbol;Acc:1589754]	protein_coding	439	5.85008	519	7.56097
ENSRNOG00000009068	Phlda3	pleckstrin homology-like domain, family A, member 3 [Source:RGD Symbol;Acc:1310502]	protein_coding	186	5.82511	1206	41.471
ENSRNOG00000008676	Emp1	epithelial membrane protein 1 [Source:RGD Symbol;Acc:2552]	protein_coding	343	5.78777	2255	46.8699
ENSRNOG00000008039	Cul5	cullin 5 [Source:RGD Symbol;Acc:621742]	protein_coding	414	5.7825	603	9.19981
ENSRNOG00000050514	LOC684509	similar to NADH-ubiquinone oxidoreductase B9 subunit (Complex I-B9) (CI-B9) [Source:RGD Symbol;Acc:1589176]	protein_coding	33	5.74551	55	10.4329
ENSRNOG00000003905	Nsf	N-ethylmaleimide sensitive factor, vesicle fusing ATPase [Source:RGD Symbol;Acc:621594]	protein_coding	482	5.7436	438	5.70043
ENSRNOG00000019426	Ramac	RNA guanine-7 methyltransferase activating subunit [Source:RGD Symbol;Acc:1310022]	protein_coding	102	5.72346	123	7.60025
ENSRNOG00000009550	Sqle	squalene epoxidase [Source:RGD Symbol;Acc:3755]	protein_coding	347	5.69826	1428	25.6282
ENSRNOG00000008305	Sc5d	sterol-C5-desaturase [Source:RGD Symbol;Acc:620775]	protein_coding	621	5.69386	4707	47.2264
ENSRNOG00000012550	Uqcrh	ubiquinol-cytochrome c reductase hinge protein [Source:RGD Symbol;Acc:1305987]	protein_coding	70	5.67667	1121	100.21
ENSRNOG00000003226	Mprip	myosin phosphatase Rho interacting protein [Source:RGD Symbol;Acc:619947]	protein_coding	493	5.66421	5457	66.2857
ENSRNOG00000011076	Ank2	ankyrin 2 [Source:RGD Symbol;Acc:620156]	protein_coding	158	5.64644	2702	18.8409
ENSRNOG00000021438	Tuba1c	tubulin, alpha 1C [Source:RGD Symbol;Acc:1307226]	protein_coding	194	5.64078	7317	233.575
ENSRNOG00000033855	AABR07062466.1		protein_coding	61	5.63521	164	16.5909
ENSRNOG00000055068	Ppial4d	peptidylprolyl isomerase A (cyclophilin A)-like 4D [Source:RGD Symbol;Acc:2321083]	protein_coding	96	5.5709	939	59.8279
ENSRNOG00000058031	7SK	7SK RNA [Source:RFAM;Acc:RF00100]	misc_RNA	41	5.56645	112	16.8108
ENSRNOG00000031178	LOC100362054	mCG114696-like [Source:RGD Symbol;Acc:2318927]	protein_coding	183	5.56534	0	0
ENSRNOG00000023322	Ostc	oligosaccharyltransferase complex non-catalytic subunit [Source:RGD Symbol;Acc:1560708]	protein_coding	131	5.51631	665	30.6765
ENSRNOG00000043007	Rcn3	reticulocalbin 3 [Source:RGD Symbol;Acc:1359365]	protein_coding	198	5.50683	1754	53.3411
ENSRNOG00000040153	LOC108348062	eukaryotic translation initiation factor 3 subunit H [Source:RGD Symbol;Acc:11498408]	protein_coding	95	5.49097	596	37.7691
ENSRNOG00000017610	Nedd4l	neural precursor cell expressed, developmentally down-regulated 4-like, E3 ubiquitin protein ligase [Source:RGD Symbol;Acc:735047]	protein_coding	516	5.48159	378	4.38765
ENSRNOG00000038150	RGD1560394	RGD1560394 [Source:RGD Symbol;Acc:1560394]	protein_coding	82	5.47021	20	1.47188
ENSRNOG00000013089	Kif13b	kinesin family member 13B [Source:RGD Symbol;Acc:1303307]	protein_coding	712	5.46072	5107	42.8609
ENSRNOG00000017905	Map1lc3b	microtubule-associated protein 1 light chain 3 beta [Source:RGD Symbol;Acc:621315]	protein_coding	143	5.43309	975	53.372
ENSRNOG00000006919	Clvs1	clavesin 1 [Source:RGD Symbol;Acc:1564200]	protein_coding	197	5.43114	0	0
ENSRNOG00000015544	LOC100909441	tubulin alpha-1C chain-like [Source:RGD Symbol;Acc:6503589]	protein_coding	163	5.41607	5557	201.895
ENSRNOG00000002142	Cds1	CDP-diacylglycerol synthase 1 [Source:RGD Symbol;Acc:621185]	protein_coding	239	5.40594	128	3.15711
ENSRNOG00000049351	Nat8l	N-acetyltransferase 8-like [Source:RGD Symbol;Acc:1305719]	protein_coding	393	5.36414	0	0
ENSRNOG00000062108	Tomm5	translocase of outer mitochondrial membrane 5 [Source:RGD Symbol;Acc:1596808]	protein_coding	377	5.3609	113	8.26782
ENSRNOG00000032828	Mapk8ip2	mitogen-activated protein kinase 8 interacting protein 2 [Source:RGD Symbol;Acc:1309727]	protein_coding	618	5.34211	542	5.11769
ENSRNOG00000004303	Timp3	TIMP metallopeptidase inhibitor 3 [Source:RGD Symbol;Acc:3865]	protein_coding	209	5.33205	4518	126.49
ENSRNOG00000017801	Atf4	activating transcription factor 4 [Source:RGD Symbol;Acc:621863]	protein_coding	167	5.31742	1556	54.323
ENSRNOG00000004710	Rbks	ribokinase [Source:RGD Symbol;Acc:1310064]	protein_coding	167	5.27831	68	2.32099
ENSRNOG00000010800	Hadhb	hydroxyacyl-CoA dehydrogenase trifunctional multienzyme complex subunit beta [Source:RGD Symbol;Acc:620513]	protein_coding	226	5.26224	1070	27.2698
ENSRNOG00000024918	Fam229b	family with sequence similarity 229, member B [Source:RGD Symbol;Acc:2300149]	protein_coding	79	5.21326	43	3.09856
ENSRNOG00000013286	Pdcl3	phosducin-like 3 [Source:RGD Symbol;Acc:1309663]	protein_coding	223	5.20382	1050	26.7941
ENSRNOG00000053756	Rps15al4	ribosomal protein S15A-like 4 [Source:RGD Symbol;Acc:2319559]	protein_coding	51	5.19854	152	16.955
ENSRNOG00000001733	Ppp1r2	protein phosphatase 1, regulatory (inhibitor) subunit 2 [Source:RGD Symbol;Acc:621099]	protein_coding	230	5.19775	877	21.6725
ENSRNOG00000003120	Prelp	proline and arginine rich end leucine rich repeat protein [Source:RGD Symbol;Acc:620226]	protein_coding	408	5.14269	12135	214.647
ENSRNOG00000000316	Sobp	sine oculis binding protein homolog [Source:RGD Symbol;Acc:1560479]	protein_coding	298	5.14065	62	1.16551
ENSRNOG00000008307	Nanp	N-acetylneuraminic acid phosphatase [Source:RGD Symbol;Acc:1306009]	protein_coding	152	5.11281	20	0.738717
ENSRNOG00000013282	Mctp1	multiple C2 and transmembrane domain containing 1 [Source:RGD Symbol;Acc:1305199]	protein_coding	421	5.05485	193	4.34741
ENSRNOG00000008258	Fnbp1	formin binding protein 1 [Source:RGD Symbol;Acc:621350]	protein_coding	236	5.02442	2296	54.4331
ENSRNOG00000007128	Nop56	NOP56 ribonucleoprotein [Source:RGD Symbol;Acc:1308892]	protein_coding	214	5.02299	447	11.4675
ENSRNOG00000012644	Nup58	nucleoporin 58 [Source:RGD Symbol;Acc:631334]	protein_coding	264	4.99767	282	5.83361
ENSRNOG00000018288	Ncoa6	nuclear receptor coactivator 6 [Source:RGD Symbol;Acc:620111]	protein_coding	745	4.97859	3255	23.7917
ENSRNOG00000015658	Sorbs1	sorbin and SH3 domain containing 1 [Source:RGD Symbol;Acc:1586598]	protein_coding	325	4.96812	8971	177.931
ENSRNOG00000002050	Igfbp7	insulin-like growth factor binding protein 7 [Source:RGD Symbol;Acc:1306201]	protein_coding	123	4.96397	23666	1050.98
ENSRNOG00000034180	LOC100360841	ribosomal protein L37-like [Source:RGD Symbol;Acc:2321317]	protein_coding	39	4.95372	1383	194.971
ENSRNOG00000026821	Arhgap42	Rho GTPase activating protein 42 [Source:RGD Symbol;Acc:1564081]	protein_coding	404	4.95246	2109	28.3133
ENSRNOG00000013072	Plxna4	plexin A4 [Source:RGD Symbol;Acc:1308074]	protein_coding	628	4.94507	128	1.09914
ENSRNOG00000015654	Ghr	growth hormone receptor [Source:RGD Symbol;Acc:2687]	protein_coding	126	4.89515	459	9.70349
ENSRNOG00000051483	LOC103689961	selenoprotein W-like [Source:RGD Symbol;Acc:9418506]	protein_coding	73	4.89278	988	72.6754
ENSRNOG00000004107	Rpl23	ribosomal protein L23 [Source:RGD Symbol;Acc:62067]	protein_coding	62	4.88882	1890	164.522
ENSRNOG00000014582	Mrpl18	mitochondrial ribosomal protein L18 [Source:RGD Symbol;Acc:1306387]	protein_coding	102	4.80402	341	17.6094
ENSRNOG00000052204	Tbc1d24	TBC1 domain family, member 24 [Source:RGD Symbol;Acc:1306143]	protein_coding	404	4.80317	188	2.43384
ENSRNOG00000043387	Cpe	carboxypeptidase E [Source:RGD Symbol;Acc:2394]	protein_coding	225	4.80223	3972	93.0405
ENSRNOG00000003936	Pwwp2a	PWWP domain containing 2A [Source:RGD Symbol;Acc:1305891]	protein_coding	303	4.72535	244	4.15558
ENSRNOG00000031506	Ftl1	ferritin light chain 1 [Source:RGD Symbol;Acc:61813]	protein_coding	96	4.72026	5082	273.906
ENSRNOG00000001488	Psmb1	proteasome subunit beta 1 [Source:RGD Symbol;Acc:621092]	protein_coding	113	4.71433	365	16.7142
ENSRNOG00000052207	LOC100909878	40S ribosomal protein S15a-like [Source:RGD Symbol;Acc:6501297]	protein_coding	49	4.69437	108	11.3757
ENSRNOG00000048509	Ubxn6	UBX domain protein 6 [Source:RGD Symbol;Acc:1590866]	protein_coding	218	4.62059	355	8.22363
ENSRNOG00000028856	Pknox2	PBX/knotted 1 homeobox 2 [Source:RGD Symbol;Acc:1590611]	protein_coding	379	4.56589	524	7.53798
ENSRNOG00000058218	AC131806.3		processed_pseudogene	45	4.53524	17	1.84515
ENSRNOG00000002203	Lin54	lin-54 DREAM MuvB core complex component [Source:RGD Symbol;Acc:1311361]	protein_coding	433	4.49107	647	7.33959
ENSRNOG00000010588	Tns2	tensin 2 [Source:RGD Symbol;Acc:1310917]	protein_coding	418	4.45079	3688	42.9337
ENSRNOG00000046383	AABR07030156.2		miRNA	10	4.44661	224	113.976
ENSRNOG00000020353	Sh3pxd2a	SH3 and PX domains 2A [Source:RGD Symbol;Acc:1311185]	protein_coding	361	4.43917	2572	34.6658
ENSRNOG00000014179	Rps2	ribosomal protein S2 [Source:RGD Symbol;Acc:619887]	protein_coding	88	4.43066	2063	114.464
ENSRNOG00000000701	Iscu	iron-sulfur cluster assembly enzyme [Source:RGD Symbol;Acc:1309562]	protein_coding	91	4.40728	1312	69.4786
ENSRNOG00000002271	Slain2	SLAIN motif family, member 2 [Source:RGD Symbol;Acc:1311593]	protein_coding	470	4.38625	5554	56.728
ENSRNOG00000039091	Pnpla8	patatin-like phospholipase domain containing 8 [Source:RGD Symbol;Acc:1311444]	protein_coding	435	4.38347	1717	28.7711
ENSRNOG00000012297	March8	membrane associated ring-CH-type finger 8 [Source:RGD Symbol;Acc:1309339]	protein_coding	437	4.3725	1100	12.3601
ENSRNOG00000014254	Cpt1a	carnitine palmitoyltransferase 1A [Source:RGD Symbol;Acc:2396]	protein_coding	417	4.30944	222	2.50762
ENSRNOG00000004612	Ppp1cb	protein phosphatase 1 catalytic subunit beta [Source:RGD Symbol;Acc:3376]	protein_coding	281	4.29739	2594	43.3561
ENSRNOG00000022595	LOC100362965	SNRPN upstream reading frame protein-like [Source:RGD Symbol;Acc:2323728]	protein_coding	21	4.27179	13	2.91375
ENSRNOG00000014083	Iqsec3	IQ motif and Sec7 domain 3 [Source:RGD Symbol;Acc:1593191]	protein_coding	705	4.27091	113	0.745362
ENSRNOG00000012364	Prickle2	prickle planar cell polarity protein 2 [Source:RGD Symbol;Acc:1306723]	protein_coding	730	4.25432	1090	6.94336
ENSRNOG00000003258	Cdc73	cell division cycle 73 [Source:RGD Symbol;Acc:1311766]	protein_coding	197	4.24902	575	13.592
ENSRNOG00000029461	AABR07072400.1		protein_coding	41	4.21134	51	5.79499
ENSRNOG00000009481	Ddhd1	DDHD domain containing 1 [Source:RGD Symbol;Acc:1308576]	protein_coding	321	4.20785	333	4.78365
ENSRNOG00000026979	AABR07069466.1		protein_coding	203	4.19962	0	0
ENSRNOG00000011066	March6	membrane associated ring-CH-type finger 6 [Source:RGD Symbol;Acc:1565757]	protein_coding	291	4.15784	684	10.6925
ENSRNOG00000058561	Srrm2	serine/arginine repetitive matrix 2 [Source:RGD Symbol;Acc:1310163]	protein_coding	746	4.11156	11634	70.108
ENSRNOG00000047088	Rab10	RAB10, member RAS oncogene family [Source:RGD Symbol;Acc:620879]	protein_coding	249	4.09535	3965	71.5083
ENSRNOG00000005434	Sptbn1	spectrin, beta, non-erythrocytic 1 [Source:RGD Symbol;Acc:727922]	protein_coding	664	4.05877	52031	355.301
ENSRNOG00000030963	LOC108351137	glyceraldehyde-3-phosphate dehydrogenase [Source:RGD Symbol;Acc:11369796]	protein_coding	116	4.00688	3785	143.009
ENSRNOG00000004214	Rpl26	ribosomal protein L26 [Source:RGD Symbol;Acc:1310607]	protein_coding	101	4.00499	2517	214.464
ENSRNOG00000012378	Dbnl	drebrin-like [Source:RGD Symbol;Acc:70941]	protein_coding	206	4.00177	1323	28.2099
ENSRNOG00000019973	Arl3	ADP ribosylation factor like GTPase 3 [Source:RGD Symbol;Acc:69327]	protein_coding	122	3.99419	1029	37.0923
ENSRNOG00000008734	Zmym2	zinc finger MYM-type containing 2 [Source:RGD Symbol;Acc:1593255]	protein_coding	368	3.97061	2525	29.7826
ENSRNOG00000021153	Fkbp2	FKBP prolyl isomerase 2 [Source:RGD Symbol;Acc:1560660]	protein_coding	56	3.95144	757	58.4791
ENSRNOG00000048622	Sin3b	SIN3 transcription regulator family member B [Source:RGD Symbol;Acc:1587989]	protein_coding	98	3.95077	91	4.01814
ENSRNOG00000054769	U2	U2 spliceosomal RNA [Source:RFAM;Acc:RF00004]	snRNA	17	3.9359	2	0.290395
ENSRNOG00000034037	Zfp266	zinc finger protein 266 [Source:RGD Symbol;Acc:1308643]	protein_coding	500	3.91841	2562	23.3979
ENSRNOG00000003011	Gadd45gip1	GADD45G interacting protein 1 [Source:RGD Symbol;Acc:1309249]	protein_coding	106	3.91319	465	18.763
ENSRNOG00000054582	LOC103694857	hemoglobin subunit beta-2 [Source:RGD Symbol;Acc:9218369]	protein_coding	55	3.91166	294	23.0613
ENSRNOG00000047374	Gnas	GNAS complex locus [Source:NCBI gene;Acc:24896]	protein_coding	99	3.89516	8403	363.891
ENSRNOG00000049913	LOC100910990	copine-1-like [Source:RGD Symbol;Acc:6495669]	protein_coding	269	3.88424	129	2.03477
ENSRNOG00000021688	AABR07056686.1		protein_coding	37	3.84403	60	6.73778
ENSRNOG00000059807	AC121663.1		miRNA	12	3.83741	0	0
ENSRNOG00000009264	Erc1	ELKS/RAB6-interacting/CAST family member 1 [Source:RGD Symbol;Acc:628733]	protein_coding	730	3.82708	2360	13.8808
ENSRNOG00000023385	Rpl37a	ribosomal protein L37a [Source:RGD Symbol;Acc:2319947]	protein_coding	109	3.82163	9395	362.311
ENSRNOG00000031052	LOC100362751	ribosomal protein P2-like [Source:RGD Symbol;Acc:2324107]	protein_coding	30	3.81892	245	34.3504
ENSRNOG00000046309	Gpr68	G protein-coupled receptor 68 [Source:RGD Symbol;Acc:1309559]	protein_coding	218	3.80045	6	0.101278
ENSRNOG00000002461	Nid1	nidogen 1 [Source:RGD Symbol;Acc:3178]	protein_coding	480	3.77063	21083	181.044
ENSRNOG00000001717	Opa1	OPA1, mitochondrial dynamin like GTPase [Source:RGD Symbol;Acc:708423]	protein_coding	264	3.75435	703	11.1326
ENSRNOG00000031367	Hprt1	hypoxanthine phosphoribosyltransferase 1 [Source:RGD Symbol;Acc:2826]	protein_coding	103	3.75262	217	8.65048
ENSRNOG00000006209	Mbd6	methyl-CpG binding domain protein 6 [Source:RGD Symbol;Acc:1311050]	protein_coding	333	3.74625	499	6.13582
ENSRNOG00000014981	Usp14	ubiquitin specific peptidase 14 [Source:RGD Symbol;Acc:1311825]	protein_coding	178	3.74096	358	8.37419
ENSRNOG00000012663	Mfsd6	major facilitator superfamily domain containing 6 [Source:RGD Symbol;Acc:1562317]	protein_coding	403	3.72715	832	8.63298
ENSRNOG00000033351	Zfp869	zinc finger protein 869 [Source:RGD Symbol;Acc:2320746]	protein_coding	133	3.72518	404	12.4029
ENSRNOG00000057903	AC108574.1		lincRNA	259	3.71426	771	12.105
ENSRNOG00000005957	Slc4a7	solute carrier family 4 member 7 [Source:RGD Symbol;Acc:621208]	protein_coding	336	3.71299	237	3.07875
ENSRNOG00000014876	Lpin2	lipin 2 [Source:RGD Symbol;Acc:1304588]	protein_coding	480	3.70468	282	2.38114
ENSRNOG00000026466	Lrrtm3	leucine rich repeat transmembrane neuronal 3 [Source:RGD Symbol;Acc:1304866]	protein_coding	315	3.66312	241	2.65026
ENSRNOG00000004201	Rims2	regulating synaptic membrane exocytosis 2 [Source:RGD Symbol;Acc:620001]	protein_coding	512	3.65511	103	0.639145
ENSRNOG00000006877	Efnb1	ephrin B1 [Source:RGD Symbol;Acc:2540]	protein_coding	265	3.6334	2469	37.0173
ENSRNOG00000036698	Nploc4	NPL4 homolog, ubiquitin recognition factor [Source:RGD Symbol;Acc:620794]	protein_coding	365	3.62898	426	4.62101
ENSRNOG00000016357	Casc4	cancer susceptibility 4 [Source:RGD Symbol;Acc:1305985]	protein_coding	290	3.60294	1482	20.1804
ENSRNOG00000010131	Rin2	Ras and Rab interactor 2 [Source:RGD Symbol;Acc:1305873]	protein_coding	372	3.56922	460	4.85683
ENSRNOG00000061254	AABR07015042.1		miRNA	4	3.5578	259	258.104
ENSRNOG00000039985	Ube2a	ubiquitin-conjugating enzyme E2A [Source:RGD Symbol;Acc:1359534]	protein_coding	136	3.54969	137	3.90296
ENSRNOG00000003611	Dynlt3	dynein light chain Tctex-type 3 [Source:RGD Symbol;Acc:1549755]	protein_coding	170	3.54542	1947	44.4073
ENSRNOG00000001709	Ap2m1	adaptor related protein complex 2 subunit mu 1 [Source:RGD Symbol;Acc:620135]	protein_coding	143	3.54212	2130	57.7784
ENSRNOG00000000321	Cd24	CD24 molecule [Source:RGD Symbol;Acc:2298]	protein_coding	146	3.53592	180	4.76781
ENSRNOG00000009808	Ift80	intraflagellar transport 80 [Source:RGD Symbol;Acc:1312006]	protein_coding	304	3.52241	210	2.66118
ENSRNOG00000008921	Dynll2	dynein light chain LC8-type 2 [Source:RGD Symbol;Acc:619860]	protein_coding	183	3.5212	2844	59.8969
ENSRNOG00000002104	Scaf4	SR-related CTD-associated factor 4 [Source:RGD Symbol;Acc:727896]	protein_coding	339	3.51683	2274	25.9137
ENSRNOG00000047776	AABR07027753.2	histone cluster 1, H2bd-like [Source:NCBI gene;Acc:100365043]	pseudogene	30	3.50617	32	4.06592
ENSRNOG00000021882	Tmed9	transmembrane p24 trafficking protein 9 [Source:RGD Symbol;Acc:1307627]	protein_coding	109	3.49744	279	9.77082
ENSRNOG00000045892	Cfl2	cofilin 2 [Source:RGD Symbol;Acc:1306982]	protein_coding	229	3.49661	2346	39.2534
ENSRNOG00000012314	Slirp	SRA stem-loop interacting RNA binding protein [Source:RGD Symbol;Acc:1585290]	protein_coding	220	3.48594	397	6.8919
ENSRNOG00000004252	Eif3h	eukaryotic translation initiation factor 3, subunit H [Source:RGD Symbol;Acc:735178]	protein_coding	98	3.48448	912	35.4685
ENSRNOG00000025936	Rpl6	ribosomal protein L6 [Source:RGD Symbol;Acc:619826]	protein_coding	70	3.48148	2714	148.068
ENSRNOG00000019490	Slc20a2	solute carrier family 20 member 2 [Source:RGD Symbol;Acc:3699]	protein_coding	282	3.47186	2409	32.51
ENSRNOG00000030771	Dgkb	diacylglycerol kinase, beta [Source:RGD Symbol;Acc:2488]	protein_coding	509	3.46775	38	0.278224
ENSRNOG00000016717	Gas2	growth arrest-specific 2 [Source:RGD Symbol;Acc:1563167]	protein_coding	175	3.46566	462	10.0005
ENSRNOG00000033057	AABR07025010.1		protein_coding	97	3.46413	1056	41.5261
ENSRNOG00000010827	Ptbp2	polypyrimidine tract binding protein 2 [Source:RGD Symbol;Acc:1359267]	protein_coding	148	3.46075	1150	29.5715
ENSRNOG00000050843	Mmut	methylmalonyl-CoA mutase [Source:RGD Symbol;Acc:1587662]	protein_coding	328	3.4585	216	2.48962
ENSRNOG00000054419	U1	U1 spliceosomal RNA [Source:RFAM;Acc:RF00003]	snRNA	13	3.44893	1	0.073211
ENSRNOG00000009090	Dad1	defender against cell death 1 [Source:RGD Symbol;Acc:621028]	protein_coding	67	3.43118	2207	125.269
ENSRNOG00000002251	Sec31a	SEC31 homolog A, COPII coat complex component [Source:RGD Symbol;Acc:620233]	protein_coding	338	3.41992	2429	30.4103
ENSRNOG00000010274	Smc4	structural maintenance of chromosomes 4 [Source:RGD Symbol;Acc:1306680]	protein_coding	324	3.41909	486	5.60298
ENSRNOG00000014654	LOC691807	hypothetical protein LOC691807 [Source:RGD Symbol;Acc:1594660]	protein_coding	83	3.4173	270	12.2193
ENSRNOG00000017916	Rexo1	RNA exonuclease 1 homolog [Source:RGD Symbol;Acc:1309872]	protein_coding	341	3.41524	209	2.2913
ENSRNOG00000026742	Ypel5	yippee-like 5 [Source:RGD Symbol;Acc:1309657]	protein_coding	161	3.40388	883	20.4489
ENSRNOG00000057622	Rbm41	RNA binding motif protein 41 [Source:RGD Symbol;Acc:1590579]	protein_coding	423	3.39508	227	1.9877
ENSRNOG00000027264	Dagla	diacylglycerol lipase, alpha [Source:RGD Symbol;Acc:1359461]	protein_coding	418	3.35942	495	4.3448
ENSRNOG00000014844	Kif21a	kinesin family member 21A [Source:RGD Symbol;Acc:1305126]	protein_coding	373	3.34747	2280	23.7809
ENSRNOG00000034246	Rps27a	ribosomal protein S27a [Source:RGD Symbol;Acc:6489478]	protein_coding	41	3.33687	1541	138.335
ENSRNOG00000016516	Mbp	myelin basic protein [Source:RGD Symbol;Acc:3054]	protein_coding	147	3.32932	126454	3004.67
ENSRNOG00000006587	Setd3	SET domain containing 3, actin histidine methyltransferase [Source:RGD Symbol;Acc:1309550]	protein_coding	133	3.31915	875	23.891
ENSRNOG00000010169	Atpaf1	ATP synthase mitochondrial F1 complex assembly factor 1 [Source:RGD Symbol;Acc:1305417]	protein_coding	317	3.31645	291	3.32264
ENSRNOG00000056717	U2	U2 spliceosomal RNA [Source:RFAM;Acc:RF00004]	snRNA	15	3.3123	0	0
ENSRNOG00000002907	Plekha6	pleckstrin homology domain containing A6 [Source:RGD Symbol;Acc:1564395]	processed_transcript	414	3.31113	1841	16.1009
ENSRNOG00000007937	Krit1	KRIT1, ankyrin repeat containing [Source:RGD Symbol;Acc:1305929]	protein_coding	225	3.30747	442	7.09805
ENSRNOG00000053929	RNaseP_nuc	Nuclear RNase P [Source:RFAM;Acc:RF00009]	ribozyme	32	3.30318	405	46.2293
ENSRNOG00000052707	Cacna1a	calcium voltage-gated channel subunit alpha1 A [Source:RGD Symbol;Acc:2244]	protein_coding	658	3.30096	323	1.77002
ENSRNOG00000012733	Ankrd12	ankyrin repeat domain 12 [Source:RGD Symbol;Acc:1310118]	protein_coding	720	3.29299	2231	11.1649
ENSRNOG00000011227	Atp1b2	ATPase Na+/K+ transporting subunit beta 2 [Source:RGD Symbol;Acc:2171]	protein_coding	221	3.27859	9115	148.241
ENSRNOG00000002349	Gabra2	gamma-aminobutyric acid type A receptor alpha2 subunit [Source:RGD Symbol;Acc:61856]	protein_coding	151	3.26329	0	0
ENSRNOG00000057626	Kif1b	kinesin family member 1B [Source:RGD Symbol;Acc:621520]	protein_coding	710	3.2461	5192	35.922
ENSRNOG00000007051	Rraga	Ras-related GTP binding A [Source:RGD Symbol;Acc:619804]	protein_coding	116	3.23935	206	6.30715
ENSRNOG00000013397	Foxo1	forkhead box O1 [Source:RGD Symbol;Acc:620283]	protein_coding	184	3.21695	953	18.2093
ENSRNOG00000016478	Eif5a	eukaryotic translation initiation factor 5A [Source:RGD Symbol;Acc:1308029]	protein_coding	86	3.19761	861	35.1932
ENSRNOG00000062181	AABR07072236.1		lincRNA	98	3.17353	1520	54.3349
ENSRNOG00000042458	AABR07046707.1		protein_coding	165	3.15407	960	20.163
ENSRNOG00000038140	Nsd2	nuclear receptor binding SET domain protein 2 [Source:RGD Symbol;Acc:1307955]	protein_coding	402	3.1531	334	2.86773
ENSRNOG00000037380	AC136661.1		protein_coding	48	3.14669	59	4.26611
ENSRNOG00000062298	Rpl13a	ribosomal protein L13A [Source:RGD Symbol;Acc:628697]	protein_coding	73	3.14045	6766	328.478
ENSRNOG00000013257	Hecw2	HECT, C2 and WW domain containing E3 ubiquitin protein ligase 2 [Source:RGD Symbol;Acc:1593244]	protein_coding	371	3.13383	164	1.51305
ENSRNOG00000018087	Vim	vimentin [Source:RGD Symbol;Acc:621646]	protein_coding	129	3.09895	34788	916.804
ENSRNOG00000011621	Hnrnpc	heterogeneous nuclear ribonucleoprotein C [Source:RGD Symbol;Acc:1309982]	protein_coding	124	3.08888	222	6.50547
ENSRNOG00000007387	Per1	period circadian regulator 1 [Source:RGD Symbol;Acc:727863]	protein_coding	279	3.08135	692	8.36272
ENSRNOG00000061081	U2	U2 spliceosomal RNA [Source:RFAM;Acc:RF00004]	snRNA	14	3.07583	0	0
ENSRNOG00000053753	AABR07070307.1		processed_transcript	412	3.07137	6351	51.837
ENSRNOG00000026870	Clic6	chloride intracellular channel 6 [Source:RGD Symbol;Acc:727938]	protein_coding	250	3.06361	51	0.67635
ENSRNOG00000008195	Ywhaz	tyrosine 3-monooxygenase/tryptophan 5-monooxygenase activation protein, zeta [Source:RGD Symbol;Acc:3980]	protein_coding	122	3.04289	2689	73.3501
ENSRNOG00000047179	Aplp2	amyloid beta precursor like protein 2 [Source:RGD Symbol;Acc:2128]	protein_coding	235	3.03634	3850	56.0822
ENSRNOG00000001303	Specc1l	sperm antigen with calponin homology and coiled-coil domains 1-like [Source:RGD Symbol;Acc:1309570]	protein_coding	398	3.00104	1432	11.8117
ENSRNOG00000011949	Ndufb5	NADH:ubiquinone oxidoreductase subunit B5 [Source:RGD Symbol;Acc:1305909]	protein_coding	72	2.99582	435	20.0132
ENSRNOG00000017977	Smpd1	sphingomyelin phosphodiesterase 1 [Source:RGD Symbol;Acc:1549719]	protein_coding	155	2.99191	2230	47.2552
ENSRNOG00000055311	U1	U1 spliceosomal RNA [Source:RFAM;Acc:RF00003]	snRNA	11	2.99023	1	0.076394
ENSRNOG00000005769	Smg8	SMG8 nonsense mediated mRNA decay factor [Source:RGD Symbol;Acc:1306862]	protein_coding	250	2.98609	752	9.83267
ENSRNOG00000029278	AABR07059675.1		protein_coding	25	2.98301	76	9.89937
ENSRNOG00000042847	LOC687707	hypothetical protein LOC687707 [Source:RGD Symbol;Acc:1597577]	protein_coding	46	2.97333	0	0
ENSRNOG00000054626	Rps8	ribosomal protein S8 [Source:RGD Symbol;Acc:61910]	protein_coding	47	2.96369	5965	419.399
ENSRNOG00000029301	AY172581.4		Mt_tRNA	5	2.93322	12	8.04782
ENSRNOG00000001201	Cstb	cystatin B [Source:RGD Symbol;Acc:2435]	protein_coding	42	2.91797	581	44.356
ENSRNOG00000027770	Trpm3	transient receptor potential cation channel, subfamily M, member 3 [Source:RGD Symbol;Acc:1304888]	protein_coding	423	2.88129	3422	25.5281
ENSRNOG00000030840	Cadm2	cell adhesion molecule 2 [Source:RGD Symbol;Acc:1305678]	protein_coding	75	2.87523	728	23.6753
ENSRNOG00000000809	Atat1	alpha tubulin acetyltransferase 1 [Source:RGD Symbol;Acc:1303066]	protein_coding	126	2.82486	384	16.5595
ENSRNOG00000010676	Smarce1	SWI/SNF related, matrix associated, actin dependent regulator of chromatin, subfamily e, member 1 [Source:RGD Symbol;Acc:1304726]	protein_coding	146	2.77729	505	11.7681
ENSRNOG00000045967	AABR07064061.1		processed_pseudogene	89	2.7728	131	4.46176
ENSRNOG00000000245	Slc16a6	solute carrier family 16, member 6 [Source:RGD Symbol;Acc:735117]	protein_coding	135	2.77101	190	4.41719
ENSRNOG00000012271	Cnot1	CCR4-NOT transcription complex, subunit 1 [Source:RGD Symbol;Acc:1308009]	protein_coding	474	2.74676	2572	16.3134
ENSRNOG00000015277	Serf2	small EDRK-rich factor 2 [Source:RGD Symbol;Acc:1588368]	protein_coding	34	2.74566	963	87.0982
ENSRNOG00000048199	Rps19l2	ribosomal protein S19-like2 [Source:RGD Symbol;Acc:68440]	protein_coding	30	2.74474	872	89.9496
ENSRNOG00000000571	Psap	prosaposin [Source:RGD Symbol;Acc:3423]	protein_coding	158	2.73893	9474	180.546
ENSRNOG00000000505	Rpl10a	ribosomal protein L10A [Source:RGD Symbol;Acc:620497]	protein_coding	44	2.73721	2732	186.976
ENSRNOG00000003206	Actr3	actin related protein 3 [Source:RGD Symbol;Acc:71024]	protein_coding	149	2.6905	1678	33.3007
ENSRNOG00000020683	Hnrnpul1	heterogeneous nuclear ribonucleoprotein U-like 1 [Source:RGD Symbol;Acc:1307456]	protein_coding	225	2.68838	2053	26.8151
ENSRNOG00000043348	LOC103692785	60S ribosomal protein L39 [Source:RGD Symbol;Acc:9201561]	protein_coding	23	2.67474	387	52.3614
ENSRNOG00000000826	Flot1	flotillin 1 [Source:RGD Symbol;Acc:70991]	protein_coding	46	2.67261	482	27.5183
ENSRNOG00000006867	Etv1	ets variant 1 [Source:RGD Symbol;Acc:1312007]	protein_coding	395	2.64208	2075	52.7381
ENSRNOG00000020369	Igf2	insulin-like growth factor 2 [Source:RGD Symbol;Acc:2870]	protein_coding	265	2.6372	3142	43.3876
ENSRNOG00000004481	Adss	adenylosuccinate synthase [Source:RGD Symbol;Acc:1310508]	protein_coding	149	2.62419	630	12.141
ENSRNOG00000008716	Nefh	neurofilament heavy [Source:RGD Symbol;Acc:3159]	protein_coding	225	2.61834	493	6.27251
ENSRNOG00000008629	Secisbp2l	SECIS binding protein 2-like [Source:RGD Symbol;Acc:1559930]	protein_coding	363	2.61681	60299	475.436
ENSRNOG00000011678	Wbp4	WW domain binding protein 4 [Source:RGD Symbol;Acc:620033]	protein_coding	182	2.61111	478	9.23542
ENSRNOG00000058057	AABR07019403.1		processed_transcript	251	2.60113	70	0.784328
ENSRNOG00000008620	Smad3	SMAD family member 3 [Source:RGD Symbol;Acc:3032]	protein_coding	293	2.60016	1695	16.4634
ENSRNOG00000018704	Nolc1	nucleolar and coiled-body phosphoprotein 1 [Source:RGD Symbol;Acc:621578]	protein_coding	207	2.56623	773	10.4788
ENSRNOG00000008855	Gjb2	gap junction protein, beta 2 [Source:RGD Symbol;Acc:728891]	protein_coding	138	2.53801	2730	55.2479
ENSRNOG00000060615	Rai1	retinoic acid induced 1 [Source:RGD Symbol;Acc:1308500]	protein_coding	431	2.5365	583	3.75628
ENSRNOG00000050800	LOC100911576	heterogeneous nuclear ribonucleoproteins C1/C2-like [Source:RGD Symbol;Acc:6491888]	protein_coding	97	2.5346	169	5.13171
ENSRNOG00000033686	Rpl38	ribosomal protein L38 [Source:RGD Symbol;Acc:1305573]	protein_coding	13	2.5305	24	5.49742
ENSRNOG00000019223	Taf3	TATA-box binding protein associated factor 3 [Source:RGD Symbol;Acc:2324594]	protein_coding	61	2.5179	1227	36.922
ENSRNOG00000017150	Med10	mediator complex subunit 10 [Source:RGD Symbol;Acc:1310128]	protein_coding	53	2.50878	68	3.47189
ENSRNOG00000012844	Tox4	TOX high mobility group box family member 4 [Source:RGD Symbol;Acc:708449]	protein_coding	164	2.49502	645	10.7211
ENSRNOG00000015093	Sparcl1	SPARC like 1 [Source:RGD Symbol;Acc:2531]	protein_coding	153	2.49308	3335	59.6493
ENSRNOG00000024870	Anks1b	ankyrin repeat and sterile alpha motif domain containing 1B [Source:RGD Symbol;Acc:1565556]	protein_coding	202	2.4756	217	2.90711
ENSRNOG00000030683	Vps26a	VPS26 retromer complex component A [Source:RGD Symbol;Acc:1359254]	protein_coding	70	2.46398	803	31.1689
ENSRNOG00000010495	Ttc17	tetratricopeptide repeat domain 17 [Source:RGD Symbol;Acc:1305410]	protein_coding	258	2.44482	768	7.96545
ENSRNOG00000009085	Prkag2	protein kinase AMP-activated non-catalytic subunit gamma 2 [Source:RGD Symbol;Acc:727782]	protein_coding	172	2.43854	614	9.53448
ENSRNOG00000012806	Rbbp6	RB binding protein 6, ubiquitin ligase [Source:RGD Symbol;Acc:1311964]	protein_coding	326	2.43807	1615	13.2266
ENSRNOG00000009439	Eef1a1	eukaryotic translation elongation factor 1 alpha 1 [Source:RGD Symbol;Acc:67387]	protein_coding	76	2.43707	27593	972.182
ENSRNOG00000051831	5_8S_rRNA	5.8S ribosomal RNA [Source:RFAM;Acc:RF00002]	rRNA	9	2.43493	324	103.46
ENSRNOG00000052141	Rps10l1	ribosomal protein S10-like 1 [Source:RGD Symbol;Acc:2323006]	protein_coding	27	2.40585	267	26.1975
ENSRNOG00000013225	Crisp2	cysteine-rich secretory protein 2 [Source:RGD Symbol;Acc:621653]	protein_coding	76	2.40521	269	9.27672
ENSRNOG00000023095	Npepps	aminopeptidase puromycin sensitive [Source:RGD Symbol;Acc:619962]	protein_coding	220	2.3916	1476	17.6023
ENSRNOG00000046005	Scd2	stearoyl-Coenzyme A desaturase 2 [Source:RGD Symbol;Acc:621177]	protein_coding	269	2.38219	174445	1691.9
ENSRNOG00000050630	AABR07070043.1		protein_coding	63	2.37121	1487	61.3953
ENSRNOG00000031889	AABR07065438.1	ribosomal protein L6, pseudo 1 [Source:NCBI gene;Acc:500714]	protein_coding	50	2.37017	516	27.0713
ENSRNOG00000053739	U1	U1 spliceosomal RNA [Source:RFAM;Acc:RF00003]	snRNA	9	2.36772	0	0
ENSRNOG00000005528	Tbk1	TANK-binding kinase 1 [Source:RGD Symbol;Acc:1588588]	protein_coding	158	2.36133	401	6.55815
ENSRNOG00000050742	Dnmbp	dynamin binding protein [Source:RGD Symbol;Acc:1583840]	protein_coding	319	2.35008	487	3.92186
ENSRNOG00000049105	AC095947.3		processed_pseudogene	4	2.34831	529	345.001
ENSRNOG00000011053	Cyp2u1	cytochrome P450, family 2, subfamily u, polypeptide 1 [Source:RGD Symbol;Acc:1309433]	protein_coding	118	2.34002	268	5.86168
ENSRNOG00000009029	Nptn	neuroplastin [Source:RGD Symbol;Acc:620296]	protein_coding	123	2.33965	1411	37.0134
ENSRNOG00000019062	Pura	purine rich element binding protein A [Source:RGD Symbol;Acc:1308543]	protein_coding	46	2.33759	2145	121.025
ENSRNOG00000052355	7SK	7SK RNA [Source:RFAM;Acc:RF00100]	misc_RNA	18	2.31554	89	12.9949
ENSRNOG00000004072	Myo1c	myosin 1C [Source:RGD Symbol;Acc:620443]	protein_coding	196	2.30956	1167	15.0707
ENSRNOG00000013408	Npas2	neuronal PAS domain protein 2 [Source:RGD Symbol;Acc:1309681]	protein_coding	218	2.28276	306	3.50143
ENSRNOG00000001991	Atp5po	ATP synthase peripheral stalk subunit OSCP [Source:RGD Symbol;Acc:621379]	protein_coding	42	2.27422	571	33.9266
ENSRNOG00000002948	Abcc3	ATP binding cassette subfamily C member 3 [Source:RGD Symbol;Acc:71101]	protein_coding	288	2.271	191	1.64922
ENSRNOG00000016227	Glrx3	glutaredoxin 3 [Source:RGD Symbol;Acc:69414]	protein_coding	64	2.27031	301	12.0382
ENSRNOG00000000648	Jmjd1c	jumonji domain containing 1C [Source:RGD Symbol;Acc:708458]	protein_coding	424	2.2671	3097	18.1191
ENSRNOG00000002276	LOC103690175	PHD finger protein 6 [Source:RGD Symbol;Acc:9471618]	protein_coding	221	2.26316	277	3.09244
ENSRNOG00000036362	AC111734.1		miRNA	6	2.24515	78	35.7851
ENSRNOG00000001136	Pebp1	phosphatidylethanolamine binding protein 1 [Source:RGD Symbol;Acc:62017]	protein_coding	55	2.23994	3143	140.335
ENSRNOG00000031045	LOC100911252	peptidyl-prolyl cis-trans isomerase A-like [Source:RGD Symbol;Acc:6493676]	protein_coding	25	2.23827	330	32.6213
ENSRNOG00000018823	Nisch	nischarin [Source:RGD Symbol;Acc:1306950]	protein_coding	224	2.22134	2892	31.3827
ENSRNOG00000004959	Actr2	actin related protein 2 [Source:RGD Symbol;Acc:1310826]	protein_coding	83	2.2183	1004	29.4129
ENSRNOG00000001592	Cct8	chaperonin containing TCP1 subunit 8 [Source:RGD Symbol;Acc:1305452]	protein_coding	125	2.21689	661	12.8195
ENSRNOG00000008758	Tspan18	tetraspanin 18 [Source:RGD Symbol;Acc:1560411]	protein_coding	184	2.21496	2520	33.1848
ENSRNOG00000037415	AABR07002938.1		pseudogene	76	2.21189	0	0
ENSRNOG00000058011	AABR07018244.2		pseudogene	48	2.20424	194	9.78193
ENSRNOG00000016834	Wdr37	WD repeat domain 37 [Source:RGD Symbol;Acc:1306189]	protein_coding	215	2.20147	159	1.77525
ENSRNOG00000012802	Tenm3	teneurin transmembrane protein 3 [Source:RGD Symbol;Acc:1306641]	protein_coding	375	2.1966	1320	8.45766
ENSRNOG00000020881	Frmd8	FERM domain containing 8 [Source:RGD Symbol;Acc:1310323]	protein_coding	143	2.19142	1665	28.3514
ENSRNOG00000022249	Mllt10	MLLT10, histone lysine methyltransferase DOT1L cofactor [Source:RGD Symbol;Acc:1310874]	protein_coding	144	2.18913	764	12.7234
ENSRNOG00000026963	Hsp90b1	heat shock protein 90 beta family member 1 [Source:RGD Symbol;Acc:1310482]	protein_coding	155	2.18175	12940	226.245
ENSRNOG00000009389	Ripk2	receptor-interacting serine-threonine kinase 2 [Source:RGD Symbol;Acc:1309167]	protein_coding	179	2.1811	962	12.8656
ENSRNOG00000014846	Anp32a	acidic nuclear phosphoprotein 32 family member A [Source:RGD Symbol;Acc:11508551]	protein_coding	51	2.17858	615	28.9051
ENSRNOG00000007845	Supt4h1	SPT4 homolog, DSIF elongation factor subunit [Source:RGD Symbol;Acc:1306372]	protein_coding	51	2.17669	548	25.7328
ENSRNOG00000018593	Txndc9	thioredoxin domain containing 9 [Source:RGD Symbol;Acc:708355]	protein_coding	61	2.17035	258	10.1516
ENSRNOG00000045811	Cldn5	claudin 5 [Source:RGD Symbol;Acc:68431]	protein_coding	69	2.15516	144	4.92675
ENSRNOG00000017493	Pias2	protein inhibitor of activated STAT, 2 [Source:RGD Symbol;Acc:71056]	protein_coding	90	2.14988	750	19.6998
ENSRNOG00000053566	AC112531.2		pseudogene	10	2.13576	0	0
ENSRNOG00000056257	Cacng7	calcium voltage-gated channel auxiliary subunit gamma 7 [Source:RGD Symbol;Acc:628807]	protein_coding	99	2.13216	11	0.245486
ENSRNOG00000054391	Snurf	SNRPN upstream reading frame [Source:RGD Symbol;Acc:69269]	protein_coding	70	2.13172	445	14.8231
ENSRNOG00000033803	Rpl37	ribosomal protein L37 [Source:RGD Symbol;Acc:621204]	protein_coding	18	2.1176	131	17.5012
ENSRNOG00000006298	Cpne3	copine 3 [Source:RGD Symbol;Acc:1310178]	protein_coding	130	2.10135	1033	18.3678
ENSRNOG00000050220	Nrxn1	neurexin 1 [Source:RGD Symbol;Acc:628659]	protein_coding	141	2.09897	502	3.66763
ENSRNOG00000021082	Kdelr1	KDEL endoplasmic reticulum protein retention receptor 1 [Source:RGD Symbol;Acc:1306764]	protein_coding	68	2.09809	1167	39.6139
ENSRNOG00000009094	Nudt4	nudix hydrolase 4 [Source:RGD Symbol;Acc:621355]	protein_coding	137	2.08531	3832	64.0869
ENSRNOG00000030237	Cox7c	cytochrome c oxidase subunit 7C [Source:RGD Symbol;Acc:2300145]	protein_coding	23	2.08456	1839	189.831
ENSRNOG00000000396	Ddx50	DExD-box helicase 50 [Source:RGD Symbol;Acc:1310934]	protein_coding	118	2.0812	840	16.4882
ENSRNOG00000020918	Ccnd1	cyclin D1 [Source:RGD Symbol;Acc:68384]	protein_coding	177	2.07165	1066	13.6925
ENSRNOG00000010117	Eif3a	eukaryotic translation initiation factor 3, subunit A [Source:RGD Symbol;Acc:1307269]	protein_coding	237	2.06973	3541	33.8135
ENSRNOG00000007410	Dab1	DAB adaptor protein 1 [Source:RGD Symbol;Acc:628770]	protein_coding	280	2.06792	128	1.03329
ENSRNOG00000059657	AABR07030184.4		snoRNA	10	2.06748	2	0.43603
ENSRNOG00000029443	LOC108350501	40S ribosomal protein S29 [Source:RGD Symbol;Acc:11433440]	protein_coding	8	2.06516	62	17.7392
ENSRNOG00000049848	Rpl21	ribosomal protein L21 [Source:RGD Symbol;Acc:68390]	protein_coding	23	2.05511	410	41.4784
ENSRNOG00000016705	Prpf4b	pre-mRNA processing factor 4B [Source:RGD Symbol;Acc:1307784]	protein_coding	200	2.05044	637	7.25774
ENSRNOG00000010239	Cnbp	CCHC-type zinc finger, nucleic acid binding protein [Source:RGD Symbol;Acc:621807]	protein_coding	76	2.04633	1861	55.4493
ENSRNOG00000014288	Fn1	fibronectin 1 [Source:RGD Symbol;Acc:2624]	protein_coding	381	2.04577	25180	151.46
ENSRNOG00000047505	Tubb4a	tubulin, beta 4A class IVa [Source:RGD Symbol;Acc:619730]	protein_coding	98	2.04007	2595	59.1711
ENSRNOG00000049198	Hist2h3c2	histone cluster 2 H3 family member C2 [Source:RGD Symbol;Acc:1306445]	protein_coding	19	2.02931	15	1.7258
ENSRNOG00000004973	Ppp2r5c	protein phosphatase 2, regulatory subunit B', gamma [Source:RGD Symbol;Acc:1585097]	protein_coding	74	2.00673	1514	45.1287
ENSRNOG00000049067	Igip	IgA-inducing protein [Source:RGD Symbol;Acc:2323374]	protein_coding	8	2.00115	63	19.0121
ENSRNOG00000004937	AABR07057765.1	CUB and Sushi multiple domains 3 [Source:NCBI gene;Acc:314942]	processed_transcript	490	1.99584	30	0
ENSRNOG00000016411	Rps12	ribosomal protein S12 [Source:RGD Symbol;Acc:62024]	protein_coding	25	1.98386	2408	216.964
ENSRNOG00000046905	Sgce	sarcoglycan, epsilon [Source:RGD Symbol;Acc:1303201]	protein_coding	75	1.98119	1443	41.8151
ENSRNOG00000012163	Plekhm2	pleckstrin homology and RUN domain containing M2 [Source:RGD Symbol;Acc:1307005]	protein_coding	160	1.97836	433	5.85846
ENSRNOG00000060522	Metazoa_SRP	Metazoan signal recognition particle RNA [Source:RFAM;Acc:RF00017]	misc_RNA	13	1.9767	6	0.947815
ENSRNOG00000017879	Gab1	GRB2-associated binding protein 1 [Source:RGD Symbol;Acc:1311085]	protein_coding	96	1.9755	2814	66.1627
ENSRNOG00000012500	Ddx10	DEAD-box helicase 10 [Source:RGD Symbol;Acc:1308990]	protein_coding	148	1.97094	449	6.53902
ENSRNOG00000061829	7SK	7SK RNA [Source:RFAM;Acc:RF00100]	misc_RNA	14	1.96666	135	20.8563
ENSRNOG00000022372	Kdm1a	lysine demethylase 1A [Source:RGD Symbol;Acc:1562975]	protein_coding	135	1.96015	633	10.0982
ENSRNOG00000048758	Snrpd2l	small nuclear ribonucleoprotein D2-like [Source:RGD Symbol;Acc:1305065]	protein_coding	16	1.93825	5	0.647051
ENSRNOG00000005630	AABR07060778.1		protein_coding	17	1.92741	54	6.88843
ENSRNOG00000017826	Mtrr	5-methyltetrahydrofolate-homocysteine methyltransferase reductase [Source:RGD Symbol;Acc:1308671]	protein_coding	102	1.91832	94	1.96682
ENSRNOG00000013177	Map3k1	mitogen-activated protein kinase kinase kinase 1 [Source:RGD Symbol;Acc:620966]	protein_coding	222	1.91802	540	5.10733
ENSRNOG00000033688	Cep170b	centrosomal protein 170B [Source:RGD Symbol;Acc:1595689]	protein_coding	294	1.91778	240	1.71375
ENSRNOG00000018761	Eif3c	eukaryotic translation initiation factor 3, subunit C [Source:RGD Symbol;Acc:1308871]	protein_coding	130	1.91616	2959	47.6929
ENSRNOG00000000902	Hsph1	heat shock protein family H (Hsp110) member 1 [Source:RGD Symbol;Acc:1311609]	protein_coding	147	1.89746	4165	59.1407
ENSRNOG00000011058	Utrn	utrophin [Source:RGD Symbol;Acc:3947]	protein_coding	523	1.87489	23752	93.3607
ENSRNOG00000048981	Ahsa1	activator of Hsp90 ATPase activity 1 [Source:RGD Symbol;Acc:1589285]	protein_coding	59	1.87247	342	12.0265
ENSRNOG00000005904	Cdc27	cell division cycle 27 [Source:RGD Symbol;Acc:1304921]	protein_coding	126	1.86821	1612	26.124
ENSRNOG00000015333	AABR07070225.1		processed_pseudogene	11	1.85202	65	12.2004
ENSRNOG00000028841	Mt1m	metallothionein 1M [Source:RGD Symbol;Acc:2324335]	protein_coding	16	1.84456	43	5.53607
ENSRNOG00000031022	LOC108348287	60S ribosomal protein L36a [Source:RGD Symbol;Acc:11421250]	protein_coding	21	1.84437	1869	185.44
ENSRNOG00000019319	Fchsd2	FCH and double SH3 domains 2 [Source:RGD Symbol;Acc:1304812]	protein_coding	175	1.84277	688	12.9037
ENSRNOG00000020386	Ash1l	ASH1 like histone lysine methyltransferase [Source:RGD Symbol;Acc:1306350]	protein_coding	468	1.83913	8635	40.3434
ENSRNOG00000000840	Atp6v1g2	ATPase H+ transporting V1 subunit G2 [Source:RGD Symbol;Acc:1303186]	protein_coding	60	1.83276	117	3.91074
ENSRNOG00000016271	Itm2b	integral membrane protein 2B [Source:RGD Symbol;Acc:620727]	protein_coding	72	1.83258	11795	328.894
ENSRNOG00000040350	Mir675	microRNA 675 [Source:RGD Symbol;Acc:2314883]	miRNA	4	1.82662	0	0
ENSRNOG00000061201	U1	U1 spliceosomal RNA [Source:RFAM;Acc:RF00003]	snRNA	7	1.82554	1	0.076394
ENSRNOG00000055247	LOC100909481	eukaryotic translation initiation factor 3 subunit E-like [Source:RGD Symbol;Acc:6503216]	protein_coding	55	1.80923	42	1.50757
ENSRNOG00000018839	Ntrk2	neurotrophic receptor tyrosine kinase 2 [Source:RGD Symbol;Acc:3213]	protein_coding	277	1.78514	728	5.13441
ENSRNOG00000002899	Akap10	A-kinase anchoring protein 10 [Source:RGD Symbol;Acc:1308869]	protein_coding	138	1.77538	396	5.59213
ENSRNOG00000048704	AABR07032392.1		protein_coding	40	1.76969	38	1.85518
ENSRNOG00000002871	Rbm25l1	RNA binding motif protein 25-like 1 [Source:RGD Symbol;Acc:1565486]	protein_coding	135	1.74635	502	7.13705
ENSRNOG00000060769	Hist1h2bd	histone cluster 1 H2B family member D [Source:RGD Symbol;Acc:1307126]	protein_coding	15	1.73482	7	0.860365
ENSRNOG00000006965	Aff4	AF4/FMR2 family, member 4 [Source:RGD Symbol;Acc:1311694]	protein_coding	393	1.73002	3970	19.1067
ENSRNOG00000013048	Pde7a	phosphodiesterase 7A [Source:RGD Symbol;Acc:68391]	protein_coding	122	1.72809	9	0.132524
ENSRNOG00000056855	LOC100911991	elongation factor 1-alpha 1-like [Source:RGD Symbol;Acc:6489209]	protein_coding	66	1.71877	4861	138.55
ENSRNOG00000020161	Zbtb7a	zinc finger and BTB domain containing 7a [Source:RGD Symbol;Acc:620946]	protein_coding	107	1.71634	357	6.26405
ENSRNOG00000001528	Gap43	growth associated protein 43 [Source:RGD Symbol;Acc:62071]	protein_coding	57	1.69594	60	1.95011
ENSRNOG00000045877	AC098547.1	bromodomain-containing protein 2-like [Source:NCBI gene;Acc:100909544]	processed_transcript	128	1.68949	695	10.199
ENSRNOG00000033913	AABR07053734.2		processed_pseudogene	15	1.68297	59	7.16266
ENSRNOG00000060376	LOC100910237	uncharacterized LOC100910237 [Source:RGD Symbol;Acc:6499508]	lincRNA	31	1.66919	6	0.317492
ENSRNOG00000007739	Rars	arginyl-tRNA synthetase [Source:RGD Symbol;Acc:1309215]	protein_coding	79	1.66116	529	12.1482
ENSRNOG00000061582	Scamp1	secretory carrier membrane protein 1 [Source:RGD Symbol;Acc:3625]	protein_coding	130	1.6598	626	8.74401
ENSRNOG00000013356	Snapin	SNAP-associated protein [Source:RGD Symbol;Acc:1560377]	protein_coding	57	1.65806	790	25.344
ENSRNOG00000058438	AABR07030184.3		snoRNA	8	1.65426	8	1.65349
ENSRNOG00000004210	Osr1	odd-skipped related transcription factor 1 [Source:RGD Symbol;Acc:1311807]	protein_coding	81	1.65383	1052	23.5258
ENSRNOG00000028993	LOC102555453	60S ribosomal protein L12-like [Source:RGD Symbol;Acc:7600399]	protein_coding	19	1.65257	832	81.7304
ENSRNOG00000011756	Phf3	PHD finger protein 3 [Source:RGD Symbol;Acc:1304925]	protein_coding	291	1.65213	1169	7.27477
ENSRNOG00000024934	Npat	nuclear protein, co-activator of histone transcription [Source:RGD Symbol;Acc:1311947]	protein_coding	226	1.64528	815	6.83948
ENSRNOG00000060288	LOC100365062	eukaryotic translation initiation factor 3, subunit 6 48kDa-like [Source:RGD Symbol;Acc:2319808]	protein_coding	55	1.64277	47	1.52722
ENSRNOG00000052253	Metazoa_SRP	Metazoan signal recognition particle RNA [Source:RFAM;Acc:RF00017]	misc_RNA	11	1.63642	0	0
ENSRNOG00000053172	Ssr4	signal sequence receptor subunit 4 [Source:RGD Symbol;Acc:62034]	protein_coding	27	1.6353	332	22.1456
ENSRNOG00000003495	Prpf8	pre-mRNA processing factor 8 [Source:RGD Symbol;Acc:1305467]	protein_coding	272	1.62924	6311	41.3462
ENSRNOG00000010825	Snapc3	small nuclear RNA activating complex, polypeptide 3 [Source:RGD Symbol;Acc:1305172]	protein_coding	59	1.61884	518	15.6342
ENSRNOG00000013271	Ireb2	iron responsive element binding protein 2 [Source:RGD Symbol;Acc:621539]	protein_coding	120	1.61724	237	3.51049
ENSRNOG00000008392	Sbf1	SET binding factor 1 [Source:RGD Symbol;Acc:1307090]	protein_coding	219	1.5901	258	2.04962
ENSRNOG00000028930	Dab2	DAB adaptor protein 2 [Source:RGD Symbol;Acc:621007]	protein_coding	93	1.58133	3709	69.5066
ENSRNOG00000011358	Hipk3	homeodomain interacting protein kinase 3 [Source:RGD Symbol;Acc:619884]	protein_coding	146	1.58034	2456	29.3329
ENSRNOG00000021176	Mtmr11	myotubularin related protein 11 [Source:RGD Symbol;Acc:1589965]	protein_coding	96	1.57982	178	3.2105
ENSRNOG00000003357	Col3a1	collagen type III alpha 1 chain [Source:RGD Symbol;Acc:71029]	protein_coding	168	1.57681	7550	77.5395
ENSRNOG00000018140	Smad2	SMAD family member 2 [Source:RGD Symbol;Acc:3031]	protein_coding	92	1.56228	1006	18.7439
ENSRNOG00000003508	Ergic1	endoplasmic reticulum-golgi intermediate compartment 1 [Source:RGD Symbol;Acc:1585015]	protein_coding	88	1.54844	269	5.2093
ENSRNOG00000060366	Hist2h3c2	histone cluster 2 H3 family member C2 [Source:RGD Symbol;Acc:1306445]	protein_coding	15	1.54377	157	18.6315
ENSRNOG00000003148	Timp2	TIMP metallopeptidase inhibitor 2 [Source:RGD Symbol;Acc:61312]	protein_coding	58	1.54307	5467	161.068
ENSRNOG00000047225	Tma7	translation machinery associated 7 homolog [Source:RGD Symbol;Acc:1584795]	protein_coding	19	1.52933	325	30.0767
ENSRNOG00000016220	Rpl12	ribosomal protein L12 [Source:RGD Symbol;Acc:1565106]	protein_coding	21	1.52863	6240	521.088
ENSRNOG00000001889	Comt	catechol-O-methyltransferase [Source:RGD Symbol;Acc:2379]	protein_coding	56	1.5243	542	16.2061
ENSRNOG00000048958	AABR07028816.1		protein_coding	10	1.52066	84	13.9779
ENSRNOG00000004337	Fam20b	FAM20B, glycosaminoglycan xylosylkinase [Source:RGD Symbol;Acc:1311162]	protein_coding	172	1.51922	1858	18.0019
ENSRNOG00000024629	Hadha	hydroxyacyl-CoA dehydrogenase trifunctional multienzyme complex subunit alpha [Source:RGD Symbol;Acc:620512]	protein_coding	100	1.50375	1596	26.4892
ENSRNOG00000047276	AABR07044711.1	M2 pyruvate kinase-like [Source:NCBI gene;Acc:100362738]	protein_coding	70	1.50244	506	11.919
ENSRNOG00000028975	LOC684762	similar to CG31613-PA [Source:RGD Symbol;Acc:1586732]	protein_coding	14	1.49051	149	17.65
ENSRNOG00000046081	AABR07015079.1		miRNA	2	1.48891	401	399.778
ENSRNOG00000007457	Serping1	serpin family G member 1 [Source:RGD Symbol;Acc:735225]	protein_coding	63	1.4883	21438	555.39
ENSRNOG00000027694	AABR07050545.1	ribosomal protein S7-like [Source:NCBI gene;Acc:100362830]	processed_pseudogene	20	1.48629	45	3.72312
ENSRNOG00000010306	H2afz	H2A histone family, member Z [Source:RGD Symbol;Acc:621464]	protein_coding	13	1.48252	530	67.5152
ENSRNOG00000055323	AABR07063421.1		miRNA	2	1.47917	245	244.604
ENSRNOG00000020773	Map3k11	mitogen-activated protein kinase kinase kinase 11 [Source:RGD Symbol;Acc:1359261]	protein_coding	116	1.47378	494	6.88833
ENSRNOG00000048122	Hist1h2aa	histone cluster 1 H2A family member a [Source:RGD Symbol;Acc:3854]	protein_coding	13	1.46902	0	0
ENSRNOG00000014762	Ppie	peptidylprolyl isomerase E [Source:RGD Symbol;Acc:1311411]	protein_coding	39	1.46695	76	3.13738
ENSRNOG00000016963	Trip12	thyroid hormone receptor interactor 12 [Source:RGD Symbol;Acc:1306607]	protein_coding	310	1.46569	5429	29.1398
ENSRNOG00000033625	AABR07027015.1		protein_coding	11	1.4588	135	19.8406
ENSRNOG00000021317	Cct2	chaperonin containing TCP1 subunit 2 [Source:RGD Symbol;Acc:1359143]	protein_coding	65	1.4581	3668	90.103
ENSRNOG00000010233	Cald1	caldesmon 1 [Source:RGD Symbol;Acc:2256]	protein_coding	145	1.44884	5379	59.0635
ENSRNOG00000002881	Ddr2	discoidin domain receptor tyrosine kinase 2 [Source:RGD Symbol;Acc:619855]	protein_coding	121	1.44295	1849	24.1788
ENSRNOG00000036318	AC119336.1		miRNA	4	1.44178	553	255.04
ENSRNOG00000032877	AABR07072261.1		protein_coding	13	1.43877	8	0.896408
ENSRNOG00000007663	Rps6	ribosomal protein S6 [Source:RGD Symbol;Acc:3602]	protein_coding	26	1.43708	3861	242.237
ENSRNOG00000021102	Scn1b	sodium voltage-gated channel beta subunit 1 [Source:RGD Symbol;Acc:3631]	protein_coding	48	1.4292	284	9.25678
ENSRNOG00000019959	Kcnc3	potassium voltage-gated channel subfamily C member 3 [Source:RGD Symbol;Acc:621358]	protein_coding	167	1.4221	56	1.00134
ENSRNOG00000061963	AABR07006076.1		processed_pseudogene	16	1.41313	63	6.3453
ENSRNOG00000060445	U1	U1 spliceosomal RNA [Source:RFAM;Acc:RF00003]	snRNA	6	1.40981	1	0.076394
ENSRNOG00000059255	Rnu3a	U3A small nuclear RNA [Source:MGI Symbol;Acc:MGI:97977]	snoRNA	7	1.39885	9	1.99402
ENSRNOG00000025964	LOC103691922	28S ribosomal protein L42, mitochondrial [Source:RGD Symbol;Acc:9333559]	processed_pseudogene	14	1.39867	3	0.298695
ENSRNOG00000049070	Rack1	receptor for activated C kinase 1 [Source:RGD Symbol;Acc:69229]	protein_coding	32	1.39675	0	0
ENSRNOG00000001149	Pxn	paxillin [Source:RGD Symbol;Acc:1305759]	protein_coding	116	1.39398	2155	29.0583
ENSRNOG00000060154	Ddx23	DEAD-box helicase 23 [Source:RGD Symbol;Acc:1308685]	protein_coding	98	1.38918	1688	26.3827
ENSRNOG00000018708	Ppp1ca	protein phosphatase 1 catalytic subunit alpha [Source:RGD Symbol;Acc:3375]	protein_coding	44	1.38835	806	28.3299
ENSRNOG00000018294	Hspa5	heat shock protein family A (Hsp70) member 5 [Source:RGD Symbol;Acc:2843]	protein_coding	80	1.38677	2178	41.5981
ENSRNOG00000011504	Akap2	A-kinase anchoring protein 2 [Source:RGD Symbol;Acc:1305135]	protein_coding	117	1.38633	1034	14.0399
ENSRNOG00000037137	Svip	small VCP interacting protein [Source:RGD Symbol;Acc:1565432]	protein_coding	37	1.38126	2859	118.536
ENSRNOG00000028883	AABR07072078.1		protein_coding	9	1.38117	35	6.1975
ENSRNOG00000052845	AABR07027809.1	similar to Histone H2A type 1 [Source:NCBI gene;Acc:680322]	protein_coding	12	1.37455	0	0
ENSRNOG00000060657	AABR07000404.1		miRNA	2	1.36463	152	151.531
ENSRNOG00000032303	LOC103690996	uncharacterized LOC103690996 [Source:RGD Symbol;Acc:9247033]	protein_coding	11	1.35995	226	31.6976
ENSRNOG00000025705	Armcx2	armadillo repeat containing, X-linked 2 [Source:RGD Symbol;Acc:1359132]	protein_coding	100	1.35676	479	7.10955
ENSRNOG00000028746	Gsto1	glutathione S-transferase omega 1 [Source:RGD Symbol;Acc:70952]	protein_coding	30	1.3561	258	13.2425
ENSRNOG00000051885	LOC100360413	eukaryotic translation elongation factor 1 alpha 1-like [Source:RGD Symbol;Acc:2322143]	protein_coding	50	1.33462	4725	139.629
ENSRNOG00000017990	Ubap2l	ubiquitin associated protein 2-like [Source:RGD Symbol;Acc:1308707]	protein_coding	122	1.33353	4742	67.177
ENSRNOG00000054854	LOC691716	similar to ribosomal protein S15a [Source:RGD Symbol;Acc:1596000]	protein_coding	12	1.32299	18	2.18078
ENSRNOG00000007648	Rab11b	RAB11B, member RAS oncogene family [Source:RGD Symbol;Acc:68369]	protein_coding	49	1.31839	3250	97.4355
ENSRNOG00000020843	LOC100360087	ferritin light chain 1-like [Source:RGD Symbol;Acc:2322860]	protein_coding	17	1.3129	32295	2863.24
ENSRNOG00000001254	Col6a2	collagen type VI alpha 2 chain [Source:RGD Symbol;Acc:1305585]	protein_coding	109	1.31249	3197	42.3386
ENSRNOG00000033389	Susd2	sushi domain containing 2 [Source:RGD Symbol;Acc:1308595]	protein_coding	93	1.29734	926	14.8573
ENSRNOG00000047898	Hist2h2aa2	histone cluster 2 H2A family member A2 [Source:RGD Symbol;Acc:1584037]	protein_coding	12	1.29533	90	11.1761
ENSRNOG00000012576	Selenos	selenoprotein S [Source:RGD Symbol;Acc:628897]	protein_coding	34	1.29304	624	26.6189
ENSRNOG00000001931	Fgf12	fibroblast growth factor 12 [Source:RGD Symbol;Acc:620163]	protein_coding	22	1.28622	73	4.79798
ENSRNOG00000017209	Tubb3	tubulin, beta 3 class III [Source:RGD Symbol;Acc:628595]	protein_coding	51	1.28359	32	0.873
ENSRNOG00000023546	Hspb1	heat shock protein family B (small) member 1 [Source:RGD Symbol;Acc:61306]	protein_coding	26	1.2819	229	12.7448
ENSRNOG00000018680	Rpl17	ribosomal protein L17 [Source:RGD Symbol;Acc:1303019]	protein_coding	18	1.28005	2744	236.403
ENSRNOG00000003171	Mpz	myelin protein zero [Source:RGD Symbol;Acc:3109]	protein_coding	54	1.27957	95791	2515.03
ENSRNOG00000022066	Fam117b	family with sequence similarity 117, member B [Source:RGD Symbol;Acc:1307676]	protein_coding	138	1.27736	1326	13.447
ENSRNOG00000022681	RGD1561113	similar to Hypothetical UPF0184 protein C9orf16 homolog [Source:RGD Symbol;Acc:1561113]	protein_coding	8	1.27697	116	22.4023
ENSRNOG00000026716	LOC100364457	ribosomal protein L9-like [Source:RGD Symbol;Acc:2321003]	protein_coding	20	1.26556	4687	333.78
ENSRNOG00000027152	N4bp2	NEDD4 binding protein 2 [Source:RGD Symbol;Acc:1565738]	protein_coding	148	1.26337	197	1.84013
ENSRNOG00000000543	Frk	fyn-related Src family tyrosine kinase [Source:RGD Symbol;Acc:621423]	protein_coding	128	1.24752	40	0.425498
ENSRNOG00000002372	Sgcd	sarcoglycan, delta [Source:RGD Symbol;Acc:1306638]	protein_coding	46	1.24091	395	11.8506
ENSRNOG00000052998	AABR07048791.1		miRNA	2	1.24036	118	117.632
ENSRNOG00000017113	Ccnt2	cyclin T2 [Source:RGD Symbol;Acc:1309205]	protein_coding	156	1.2344	568	4.91133
ENSRNOG00000016949	Slc25a33	solute carrier family 25 member 33 [Source:RGD Symbol;Acc:1583942]	protein_coding	39	1.23247	17	0.56619
ENSRNOG00000011027	Uba5	ubiquitin-like modifier activating enzyme 5 [Source:RGD Symbol;Acc:1311702]	protein_coding	66	1.23152	301	6.22182
ENSRNOG00000031730	Eloc	elongin C [Source:RGD Symbol;Acc:620658]	protein_coding	59	1.22932	403	9.22515
ENSRNOG00000011653	Washc2c	WASH complex subunit 2C [Source:RGD Symbol;Acc:735230]	protein_coding	117	1.22517	1609	20.5706
ENSRNOG00000007887	Elk4	ETS transcription factor ELK4 [Source:RGD Symbol;Acc:1310504]	protein_coding	277	1.22195	2691	13.0091
ENSRNOG00000009217	Fbxo6	F-box protein 6 [Source:RGD Symbol;Acc:620418]	protein_coding	28	1.20961	233	10.9734
ENSRNOG00000036852	Pcbp2	poly(rC) binding protein 2 [Source:RGD Symbol;Acc:1309626]	protein_coding	40	1.2066	1016	35.8471
ENSRNOG00000032835	LOC103694404	60S ribosomal protein L39 [Source:RGD Symbol;Acc:9200697]	protein_coding	5	1.20171	39	12.2027
ENSRNOG00000047611	Top1	DNA topoisomerase I [Source:RGD Symbol;Acc:621246]	protein_coding	8	1.19014	328	7.36483
ENSRNOG00000004616	Npm1	nucleophosmin 1 [Source:RGD Symbol;Acc:3192]	protein_coding	34	1.18845	2856	110.901
ENSRNOG00000003201	Rps4x	ribosomal protein S4, X-linked [Source:RGD Symbol;Acc:2324318]	protein_coding	26	1.1843	10199	611.966
ENSRNOG00000011893	Rps3a	ribosomal protein S3a [Source:RGD Symbol;Acc:62078]	protein_coding	30	1.18266	4568	203.211
ENSRNOG00000033186	AC097037.2		processed_pseudogene	10	1.17928	43	5.8597
ENSRNOG00000011658	Tex30	testis expressed 30 [Source:RGD Symbol;Acc:1309095]	protein_coding	52	1.17721	4	0.100441
ENSRNOG00000000461	Brd2	bromodomain containing 2 [Source:RGD Symbol;Acc:1303324]	protein_coding	96	1.17659	640	8.62411
ENSRNOG00000029574	Rps4x-ps9	ribosomal protein S4, X-linked, pseudogene 9 [Source:NCBI gene;Acc:29426]	protein_coding	26	1.16918	2059	103.653
ENSRNOG00000062272	LOC100361933	ribosomal protein S12-like [Source:RGD Symbol;Acc:2319147]	processed_pseudogene	11	1.16694	497	60.749
ENSRNOG00000008169	Slc24a2	solute carrier family 24 member 2 [Source:RGD Symbol;Acc:628650]	protein_coding	230	1.16321	0	0
ENSRNOG00000055038	AABR07013302.1		protein_coding	13	1.16192	145	14.5916
ENSRNOG00000055836	AABR07000402.1		miRNA	2	1.15994	241	240.168
ENSRNOG00000007892	Tram1	translocation associated membrane protein 1 [Source:RGD Symbol;Acc:1359100]	protein_coding	72	1.15807	4892	86.9233
ENSRNOG00000020081	As3mt	arsenite methyltransferase [Source:RGD Symbol;Acc:621325]	protein_coding	42	1.15628	168	5.0883
ENSRNOG00000021478	Tpd52l1	TPD52 like 1 [Source:RGD Symbol;Acc:1594796]	protein_coding	32	1.15134	32	1.26828
ENSRNOG00000029077	Dpm3	dolichyl-phosphate mannosyltransferase subunit 3, regulatory [Source:RGD Symbol;Acc:1561807]	protein_coding	11	1.1491	93	11.518
ENSRNOG00000033556	Spen	spen family transcriptional repressor [Source:RGD Symbol;Acc:1589867]	protein_coding	309	1.1489	827	3.36647
ENSRNOG00000019549	Akap12	A-kinase anchoring protein 12 [Source:RGD Symbol;Acc:70988]	protein_coding	161	1.14878	14212	113.557
ENSRNOG00000018740	Ugt1a5	UDP glucuronosyltransferase family 1 member A5 [Source:RGD Symbol;Acc:1583689]	protein_coding	61	1.1458	770	16.5287
ENSRNOG00000047067	LOC100363537	ribosomal protein L10a-like [Source:RGD Symbol;Acc:2322811]	pseudogene	19	1.14196	240	16.2332
ENSRNOG00000011476	Nars2	asparaginyl-tRNA synthetase 2, mitochondrial [Source:RGD Symbol;Acc:1305145]	protein_coding	47	1.14195	102	2.70329
ENSRNOG00000042421	RGD1559909	RGD1559909 [Source:RGD Symbol;Acc:1559909]	protein_coding	18	1.13658	34	2.34656
ENSRNOG00000033776	LOC100359668	ferritin light chain 2 [Source:RGD Symbol;Acc:2325062]	protein_coding	14	1.12745	698	61.8485
ENSRNOG00000058973	Atad2b	ATPase family, AAA domain containing 2B [Source:RGD Symbol;Acc:1566199]	protein_coding	186	1.11751	620	4.94164
ENSRNOG00000038654	Rpl39	ribosomal protein L39 [Source:RGD Symbol;Acc:3593]	protein_coding	4	1.11369	5	1.54747
ENSRNOG00000006369	Alg2	ALG2, alpha-1,3/1,6-mannosyltransferase [Source:RGD Symbol;Acc:1309940]	protein_coding	76	1.11367	231	3.73259
ENSRNOG00000014917	Nck1	NCK adaptor protein 1 [Source:RGD Symbol;Acc:1310688]	protein_coding	44	1.11309	115	3.21952
ENSRNOG00000016780	RGD1310951	similar to RIKEN cDNA E130308A19 [Source:RGD Symbol;Acc:1310951]	protein_coding	60	1.10553	208	4.23428
ENSRNOG00000024671	Dmxl1	Dmx-like 1 [Source:RGD Symbol;Acc:1307692]	protein_coding	222	1.09429	2220	11.9968
ENSRNOG00000051957	AC126897.1		pseudogene	16	1.09409	6	0.386408
ENSRNOG00000021175	Otub1	OTU deubiquitinase, ubiquitin aldehyde binding 1 [Source:RGD Symbol;Acc:1311329]	protein_coding	42	1.08965	163	4.72203
ENSRNOG00000003869	Sod3	superoxide dismutase 3 [Source:RGD Symbol;Acc:3733]	protein_coding	42	1.08349	7363	208.516
ENSRNOG00000047134	Gtf2f1	general transcription factor IIF subunit 1 [Source:RGD Symbol;Acc:1359646]	protein_coding	42	1.08287	696	19.7815
ENSRNOG00000033517	LOC100360791	tumor protein, translationally-controlled 1 [Source:RGD Symbol;Acc:2321467]	processed_pseudogene	13	1.08094	344	32.3652
ENSRNOG00000017106	Csnk1a1	casein kinase 1, alpha 1 [Source:RGD Symbol;Acc:71098]	protein_coding	50	1.07937	1643	38.8799
ENSRNOG00000028690	LOC100362366	40S ribosomal protein S17-like [Source:RGD Symbol;Acc:2318320]	protein_coding	12	1.07124	265	28.1283
ENSRNOG00000000549	Tspyl1	TSPY-like 1 [Source:RGD Symbol;Acc:1307726]	protein_coding	61	1.06317	281	5.36893
ENSRNOG00000048812	Gpx1	glutathione peroxidase 1 [Source:RGD Symbol;Acc:2729]	protein_coding	21	1.06184	863	48.1914
ENSRNOG00000001103	AABR07035437.1	sidekick cell adhesion molecule 1 [Source:NCBI gene;Acc:304297]	processed_transcript	150	1.05053	1202	16.5083
ENSRNOG00000007818	Slc45a4	solute carrier family 45, member 4 [Source:RGD Symbol;Acc:1309971]	protein_coding	69	1.03937	8	0.128291
ENSRNOG00000052555	Hist2h2aa3	histone cluster 2 H2A family member A3 [Source:RGD Symbol;Acc:1307165]	protein_coding	10	1.03252	78	9.61243
ENSRNOG00000001989	Alcam	activated leukocyte cell adhesion molecule [Source:RGD Symbol;Acc:619972]	protein_coding	66	1.02943	1608	27.4326
ENSRNOG00000010746	Rpl32	ribosomal protein L32 [Source:RGD Symbol;Acc:621203]	protein_coding	13	1.02631	5816	526.121
ENSRNOG00000011307	Slmap	sarcolemma associated protein [Source:RGD Symbol;Acc:1307674]	protein_coding	117	1.02448	1763	19.7097
ENSRNOG00000034237	LOC103693375	60S ribosomal protein L39 [Source:RGD Symbol;Acc:9312086]	protein_coding	8	1.02269	101	15.1396
ENSRNOG00000007445	Asph	aspartate-beta-hydroxylase [Source:RGD Symbol;Acc:1312000]	protein_coding	151	1.01905	2709	21.4166
ENSRNOG00000042271	Ubb	ubiquitin B [Source:RGD Symbol;Acc:621562]	pseudogene	19	1.01584	2214	130.053
ENSRNOG00000057811	AABR07015055.2		miRNA	2	1.00642	133	131.847
ENSRNOG00000054489	AABR07042821.1		pseudogene	9	1.00628	217	27.7918
ENSRNOG00000059504	AABR07015078.2		protein_coding	9	1.00339	874	111.363
ENSRNOG00000057569	Ahnak	AHNAK nucleoprotein [Source:RGD Symbol;Acc:619779]	protein_coding	394	1.00233	92853	258.312
ENSRNOG00000004736	Ralgps2	Ral GEF with PH domain and SH3 binding motif 2 [Source:RGD Symbol;Acc:1311537]	protein_coding	46	1.0016	1594	39.2023
ENSRNOG00000019453	Rps5	ribosomal protein S5 [Source:RGD Symbol;Acc:3601]	protein_coding	18	1.00129	2814	179.985
ENSRNOG00000031669	Lpp	LIM domain containing preferred translocation partner in lipoma [Source:RGD Symbol;Acc:1310535]	protein_coding	50	1.00054	478	10.5672
ENSRNOG00000059949	LOC102549061	histone H2B type 1-N-like [Source:RGD Symbol;Acc:7729692]	protein_coding	9	0.998179	73	9.2802
ENSRNOG00000018471	LOC100362339	ribosomal protein S19-like [Source:RGD Symbol;Acc:2318347]	protein_coding	12	0.997648	55	5.33333
ENSRNOG00000051850	Scarna2	small Cajal body-specific RNA 2 [Source:MGI Symbol;Acc:MGI:3819484]	scaRNA	10	0.993132	81	9.44292
ENSRNOG00000027191	Birc6	baculoviral IAP repeat-containing 6 [Source:RGD Symbol;Acc:1307247]	protein_coding	265	0.990311	3231	13.1989
ENSRNOG00000021323	Ca13	carbonic anhydrase 13 [Source:RGD Symbol;Acc:1560453]	protein_coding	44	0.982439	925	22.8184
ENSRNOG00000008785	Klf5	Kruppel-like factor 5 [Source:RGD Symbol;Acc:621446]	protein_coding	71	0.981807	2387	36.1304
ENSRNOG00000017032	Atp5f1a	ATP synthase F1 subunit alpha [Source:RGD Symbol;Acc:619993]	protein_coding	41	0.981771	1085	28.6301
ENSRNOG00000006604	Thy1	Thy-1 cell surface antigen [Source:RGD Symbol;Acc:3860]	protein_coding	30	0.979061	219	8.04022
ENSRNOG00000029410	Rpl21	ribosomal protein L21 [Source:RGD Symbol;Acc:68390]	protein_coding	11	0.974032	1596	161.622
ENSRNOG00000016483	Myo16	myosin XVI [Source:RGD Symbol;Acc:621561]	protein_coding	149	0.97327	0	0
ENSRNOG00000008713	Slc41a2	solute carrier family 41 member 2 [Source:RGD Symbol;Acc:1307292]	protein_coding	97	0.965789	66	0.716035
ENSRNOG00000011071	Nt5e	5' nucleotidase, ecto [Source:RGD Symbol;Acc:61956]	protein_coding	68	0.963804	239	3.71444
ENSRNOG00000053081	Hist2h3c2	histone cluster 2 H3 family member C2 [Source:RGD Symbol;Acc:1306445]	protein_coding	9	0.961877	195	23.2086
ENSRNOG00000033152	Rps18l1	ribosomal protein S18-like 1 [Source:RGD Symbol;Acc:2321678]	protein_coding	12	0.953555	496	44.7502
ENSRNOG00000014933	Dnttip1	deoxynucleotidyltransferase, terminal, interacting protein 1 [Source:RGD Symbol;Acc:621627]	protein_coding	36	0.951276	28	0.817737
ENSRNOG00000000852	Prrc2a	proline-rich coiled-coil 2A [Source:RGD Symbol;Acc:1303025]	protein_coding	145	0.946836	2797	24.5207
ENSRNOG00000000885	Auts2	autism susceptibility candidate 2 [Source:MGI Symbol;Acc:MGI:1919847]	protein_coding	65	0.945245	271	4.31904
ENSRNOG00000038074	LOC498555	similar to 60S acidic ribosomal protein P2 [Source:RGD Symbol;Acc:1590791]	protein_coding	9	0.932593	687	78.7042
ENSRNOG00000006639	Scn9a	sodium voltage-gated channel alpha subunit 9 [Source:RGD Symbol;Acc:69368]	protein_coding	194	0.930862	78	0.409482
ENSRNOG00000011475	Srcin1	SRC kinase signaling inhibitor 1 [Source:RGD Symbol;Acc:708439]	protein_coding	99	0.924506	6	0.054583
ENSRNOG00000006832	Zdhhc5	zinc finger, DHHC-type containing 5 [Source:RGD Symbol;Acc:1589737]	protein_coding	56	0.923732	929	16.9693
ENSRNOG00000010037	Epb41	erythrocyte membrane protein band 4.1 [Source:RGD Symbol;Acc:1564762]	protein_coding	54	0.920905	199	3.73332
ENSRNOG00000004696	Arhgap5	Rho GTPase activating protein 5 [Source:RGD Symbol;Acc:1308507]	protein_coding	103	0.917343	3183	31.149
ENSRNOG00000018584	LOC100359583	hypothetical protein LOC100359583 [Source:RGD Symbol;Acc:2323611]	protein_coding	24	0.915801	1852	77.8491
ENSRNOG00000002841	Cdc42bpa	CDC42 binding protein kinase alpha [Source:RGD Symbol;Acc:621406]	protein_coding	126	0.889012	3656	28.3534
ENSRNOG00000031275	AABR07054361.1		processed_pseudogene	22	0.88334	10	0.427021
ENSRNOG00000060594	LOC100911672	atrophin-1-like [Source:RGD Symbol;Acc:6491795]	protein_coding	70	0.875976	1151	15.8344
ENSRNOG00000001884	Ranbp1	RAN binding protein 1 [Source:RGD Symbol;Acc:1310521]	protein_coding	21	0.870854	104	4.79944
ENSRNOG00000005890	Serbp1	Serpine1 mRNA binding protein 1 [Source:RGD Symbol;Acc:619907]	protein_coding	30	0.869307	1934	62.9886
ENSRNOG00000003068	Mrnip	MRN complex interacting protein [Source:RGD Symbol;Acc:1564036]	protein_coding	25	0.863002	136	5.24604
ENSRNOG00000048927	AABR07018533.1		protein_coding	8	0.856078	47	5.55024
ENSRNOG00000057476	AABR07054045.1	WW domain-binding protein 4-like [Source:NCBI gene;Acc:100361436]	pseudogene	22	0.854871	107	4.63514
ENSRNOG00000013987	Sbno2	strawberry notch homolog 2 [Source:RGD Symbol;Acc:1307194]	protein_coding	144	0.85466	253	1.68074
ENSRNOG00000032348	Rpl35a	ribosomal protein L35a [Source:RGD Symbol;Acc:2323795]	protein_coding	7	0.853568	173	25.6046
ENSRNOG00000020769	Crebrf	CREB3 regulatory factor [Source:RGD Symbol;Acc:1310862]	protein_coding	123	0.851959	3147	23.8397
ENSRNOG00000018507	Gfpt1	glutamine fructose-6-phosphate transaminase 1 [Source:RGD Symbol;Acc:1549703]	protein_coding	118	0.851467	3341	26.3504
ENSRNOG00000015020	Idh1	isocitrate dehydrogenase (NADP(+)) 1, cytosolic [Source:RGD Symbol;Acc:2862]	protein_coding	40	0.850024	356	8.36297
ENSRNOG00000052742	U4	U4 spliceosomal RNA [Source:RFAM;Acc:RF00015]	snRNA	3	0.846847	5	1.6753
ENSRNOG00000031641	Rpl35al1	ribosomal protein L35a-like 1 [Source:RGD Symbol;Acc:628793]	protein_coding	7	0.845878	242	35.5621
ENSRNOG00000032765	AABR07068536.1		protein_coding	8	0.844081	7	0.753826
ENSRNOG00000019333	Hipk1	homeodomain interacting protein kinase 1 [Source:RGD Symbol;Acc:1304941]	protein_coding	150	0.838422	5324	32.5827
ENSRNOG00000059463	Slc39a1	solute carrier family 39 member 1 [Source:RGD Symbol;Acc:1305241]	protein_coding	45	0.832025	620	12.5758
ENSRNOG00000016011	Plekhg1	pleckstrin homology and RhoGEF domain containing G1 [Source:RGD Symbol;Acc:1583676]	protein_coding	114	0.830617	566	4.53029
ENSRNOG00000016680	Nsd1	nuclear receptor binding SET domain protein 1 [Source:RGD Symbol;Acc:1307748]	protein_coding	172	0.829707	2910	15.4206
ENSRNOG00000057514	AABR07015080.1		miRNA	1	0.826091	201	200.057
ENSRNOG00000050104	Clip3	CAP-GLY domain containing linker protein 3 [Source:RGD Symbol;Acc:1306245]	protein_coding	66	0.82577	521	7.14904
ENSRNOG00000023344	Rpl23a	ribosomal protein L23a [Source:RGD Symbol;Acc:1304897]	protein_coding	11	0.824618	949	82.266
ENSRNOG00000050067	AABR07026058.1	ribosomal protein S9-like [Source:NCBI gene;Acc:100364509]	protein_coding	11	0.824169	5	0.35189
ENSRNOG00000037984	Sccpdh	saccharopine dehydrogenase (putative) [Source:RGD Symbol;Acc:1311440]	protein_coding	35	0.82223	844	22.0856
ENSRNOG00000013442	Ciz1	CDKN1A interacting zinc finger protein 1 [Source:RGD Symbol;Acc:1305336]	protein_coding	80	0.814573	3010	55.7332
ENSRNOG00000021159	LOC100362987	ribosomal protein S27-like [Source:RGD Symbol;Acc:2323707]	protein_coding	5	0.81262	4	0.737985
ENSRNOG00000005975	LOC100362027	ribosomal protein L30-like [Source:RGD Symbol;Acc:2318953]	protein_coding	7	0.808802	3269	459.636
ENSRNOG00000050741	Rbm4	RNA binding motif protein 4 [Source:RGD Symbol;Acc:1306891]	protein_coding	26	0.803635	305	13.1395
ENSRNOG00000020715	Ddb1	damage-specific DNA binding protein 1 [Source:RGD Symbol;Acc:621889]	protein_coding	76	0.801928	1727	19.9412
ENSRNOG00000055105	U1	U1 spliceosomal RNA [Source:RFAM;Acc:RF00003]	snRNA	3	0.799434	0	0
ENSRNOG00000026528	Mrps33	mitochondrial ribosomal protein S33 [Source:RGD Symbol;Acc:1309217]	protein_coding	11	0.797393	142	11.7845
ENSRNOG00000061082	U1	U1 spliceosomal RNA [Source:RFAM;Acc:RF00003]	snRNA	3	0.796522	1	0.073211
ENSRNOG00000060561	Gdpd1	glycerophosphodiester phosphodiesterase domain containing 1 [Source:RGD Symbol;Acc:1311813]	protein_coding	21	0.794	135	5.61079
ENSRNOG00000045749	AC105515.1		protein_coding	3	0.792056	4	1.30507
ENSRNOG00000051284	AABR07002945.2		processed_pseudogene	7	0.791641	241	32.7291
ENSRNOG00000011184	Slc13a4	solute carrier family 13 member 4 [Source:RGD Symbol;Acc:1359715]	protein_coding	37	0.779308	5660	133.805
ENSRNOG00000036296	AABR07004746.3		miRNA	2	0.776028	98	45.0349
ENSRNOG00000050051	Pin4	peptidylprolyl cis/trans isomerase, NIMA-interacting 4 [Source:RGD Symbol;Acc:1590326]	protein_coding	8	0.76779	193	20.2829
ENSRNOG00000014148	Ap5m1	adaptor related protein complex 5 subunit mu 1 [Source:RGD Symbol;Acc:1308087]	protein_coding	52	0.767038	200	3.25331
ENSRNOG00000006226	Cacng2	calcium voltage-gated channel auxiliary subunit gamma 2 [Source:RGD Symbol;Acc:71095]	protein_coding	49	0.76122	0	0
ENSRNOG00000061420	AABR07062154.1		pseudogene	27	0.760386	183	5.66191
ENSRNOG00000061136	AABR07067138.1		snRNA	3	0.758908	10	3.57108
ENSRNOG00000049560	Glul	glutamate-ammonia ligase [Source:RGD Symbol;Acc:2710]	protein_coding	42	0.755834	9970	196.349
ENSRNOG00000057823	Ubc	ubiquitin C [Source:RGD Symbol;Acc:621244]	protein_coding	43	0.747867	2552	49.0609
ENSRNOG00000034052	AABR07071482.2		protein_coding	8	0.745639	40	4.43021
ENSRNOG00000032807	AABR07039448.1	40S ribosomal protein S21-like [Source:NCBI gene;Acc:100359505]	processed_pseudogene	5	0.740801	39	7.65595
ENSRNOG00000018642	Leng8	leukocyte receptor cluster member 8 [Source:RGD Symbol;Acc:1306180]	protein_coding	94	0.739714	2543	22.7987
ENSRNOG00000032635	LOC108348142	60S ribosomal protein L8 [Source:RGD Symbol;Acc:11509187]	protein_coding	14	0.736537	382	22.4283
ENSRNOG00000017770	Cdc123	cell division cycle 123 [Source:RGD Symbol;Acc:619766]	protein_coding	22	0.727834	294	11.0135
ENSRNOG00000031585	AABR07053635.2		protein_coding	8	0.72558	0	0
ENSRNOG00000051065	AABR07072184.2		processed_transcript	76	0.719458	0	0
ENSRNOG00000048215	Hist2h4a	histone cluster 2 H4 family member A [Source:RGD Symbol;Acc:1565073]	protein_coding	5	0.70897	5	0.717369
ENSRNOG00000016229	Bicral	BRD4 interacting chromatin remodeling complex associated protein like [Source:RGD Symbol;Acc:1305680]	protein_coding	67	0.707745	178	2.19243
ENSRNOG00000011700	Ptprm	protein tyrosine phosphatase, receptor type, M [Source:RGD Symbol;Acc:620776]	protein_coding	83	0.700858	915	8.45765
ENSRNOG00000046363	AABR07029907.1		miRNA	2	0.697049	2	0.954806
ENSRNOG00000031591	AABR07032255.2		pseudogene	7	0.695987	21	2.32732
ENSRNOG00000008049	Max	MYC associated factor X [Source:RGD Symbol;Acc:621101]	protein_coding	31	0.686476	5058	231.927
ENSRNOG00000011904	Trappc4	trafficking protein particle complex 4 [Source:RGD Symbol;Acc:1302991]	protein_coding	16	0.682064	55	2.81832
ENSRNOG00000008521	RGD1559821	similar to myosin, light polypeptide 6, alkali, smooth muscle and non-muscle [Source:RGD Symbol;Acc:1559821]	processed_pseudogene	7	0.676104	6	0.557463
ENSRNOG00000032578	AY172581.17		Mt_tRNA	1	0.675547	4	3.14535
ENSRNOG00000046717	AC130253.2		miRNA	2	0.672329	2	0.67017
ENSRNOG00000032130	LOC691427	similar to 6.8 kDa mitochondrial proteolipid [Source:RGD Symbol;Acc:1583946]	protein_coding	3	0.672063	59	15.687
ENSRNOG00000020698	Rnd2	Rho family GTPase 2 [Source:RGD Symbol;Acc:1306172]	protein_coding	21	0.66883	435	15.796
ENSRNOG00000046636	RGD1562378	histone H4 variant H4-v.1 [Source:RGD Symbol;Acc:1562378]	protein_coding	5	0.664958	6	0.925469
ENSRNOG00000001409	Gnb2	G protein subunit beta 2 [Source:RGD Symbol;Acc:69319]	protein_coding	25	0.664058	606	18.25
ENSRNOG00000030736	Hist2h2ac	histone cluster 2 H2A family member c [Source:RGD Symbol;Acc:1560965]	protein_coding	6	0.662837	21	2.65991
ENSRNOG00000048426	AABR07044509.1		protein_coding	6	0.660047	215	29.1422
ENSRNOG00000036701	Actg1	actin, gamma 1 [Source:RGD Symbol;Acc:1304556]	protein_coding	17	0.658821	1685	73.0941
ENSRNOG00000008332	Smo	smoothened, frizzled class receptor [Source:RGD Symbol;Acc:3726]	protein_coding	45	0.656984	1227	19.8186
ENSRNOG00000052180	Metazoa_SRP	Metazoan signal recognition particle RNA [Source:RFAM;Acc:RF00017]	misc_RNA	4	0.649321	1	0.044772
ENSRNOG00000006966	Nfia	nuclear factor I/A [Source:RGD Symbol;Acc:3170]	protein_coding	44	0.644	5835	94.4768
ENSRNOG00000014289	Arpc2	actin related protein 2/3 complex, subunit 2 [Source:RGD Symbol;Acc:1305848]	protein_coding	18	0.637715	3154	127.595
ENSRNOG00000003670	Sumo2	small ubiquitin-like modifier 2 [Source:RGD Symbol;Acc:621761]	protein_coding	5	0.62845	776	133.235
ENSRNOG00000000635	Arid5b	AT-rich interaction domain 5B [Source:RGD Symbol;Acc:1311735]	processed_transcript	50	0.626674	632	8.70646
ENSRNOG00000029441	Klhl2	kelch-like family member 2 [Source:RGD Symbol;Acc:1306388]	protein_coding	43	0.625842	101	1.61951
ENSRNOG00000008994	Arpc4	actin related protein 2/3 complex, subunit 4 [Source:RGD Symbol;Acc:1310096]	protein_coding	20	0.625577	1482	50.989
ENSRNOG00000053735	Hebp2	heme binding protein 2 [Source:RGD Symbol;Acc:1311553]	protein_coding	16	0.622599	35	1.47105
ENSRNOG00000058474	AABR07015941.1		processed_pseudogene	5	0.621904	9	1.37304
ENSRNOG00000030247	Eif4ebp3	eukaryotic translation initiation factor 4E binding protein 3 [Source:RGD Symbol;Acc:2324556]	protein_coding	115	0.620804	2543	17.6156
ENSRNOG00000000900	Tpst1	tyrosylprotein sulfotransferase 1 [Source:RGD Symbol;Acc:1308473]	protein_coding	25	0.614508	1172	32.246
ENSRNOG00000026519	LOC100364062	M2 pyruvate kinase-like [Source:RGD Symbol;Acc:2321795]	pseudogene	21	0.61419	76	2.53904
ENSRNOG00000061061	AABR07063674.2		miRNA	2	0.612336	0	0
ENSRNOG00000059869	AC128402.1		snRNA	2	0.610394	1	0.121741
ENSRNOG00000018698	Wac	WW domain containing adaptor with coiled-coil [Source:RGD Symbol;Acc:1562407]	protein_coding	27	0.608497	1310	33.0069
ENSRNOG00000024849	Tor1aip2	torsin 1A interacting protein 2 [Source:RGD Symbol;Acc:735059]	protein_coding	69	0.608077	1227	11.814
ENSRNOG00000017441	Tpm3	tropomyosin 3 [Source:RGD Symbol;Acc:621546]	protein_coding	24	0.604838	2239	72.2167
ENSRNOG00000026942	RGD1311595	similar to KIAA2026 protein [Source:RGD Symbol;Acc:1311595]	protein_coding	98	0.604044	345	2.32804
ENSRNOG00000030680	Ddx5	DEAD-box helicase 5 [Source:RGD Symbol;Acc:619906]	protein_coding	32	0.600665	2588	53.2076
ENSRNOG00000046395	AABR07006576.1		protein_coding	6	0.598523	2	0.163543
ENSRNOG00000030266	Plekhg2	pleckstrin homology and RhoGEF domain containing G2 [Source:RGD Symbol;Acc:1310112]	protein_coding	70	0.597257	1216	12.5601
ENSRNOG00000054607	Gm23650	predicted gene, 23650 [Source:MGI Symbol;Acc:MGI:5453427]	snoRNA	1	0.597027	6	3.69148
ENSRNOG00000055990	AC113837.5		snoRNA	1	0.597027	0	0
ENSRNOG00000013510	Tmem60	transmembrane protein 60 [Source:RGD Symbol;Acc:1308939]	protein_coding	19	0.596591	710	25.3517
ENSRNOG00000014791	Peg3	paternally expressed 3 [Source:RGD Symbol;Acc:2323590]	protein_coding	112	0.593488	5297	30.7287
ENSRNOG00000006532	H3f3a	H3 histone family member 3A [Source:RGD Symbol;Acc:2319910]	protein_coding	22	0.590354	2670	78.9434
ENSRNOG00000001455	Kif13a	kinesin family member 13A [Source:RGD Symbol;Acc:1307825]	protein_coding	89	0.588781	779	5.65954
ENSRNOG00000014214	Rpl27a	ribosomal protein L27a [Source:RGD Symbol;Acc:1309771]	protein_coding	14	0.58686	4645	215.041
ENSRNOG00000011463	Psmb2	proteasome subunit beta 2 [Source:RGD Symbol;Acc:61874]	protein_coding	12	0.585546	503	27.8317
ENSRNOG00000002389	Morf4l2	mortality factor 4 like 2 [Source:RGD Symbol;Acc:1359471]	protein_coding	24	0.585457	659	17.8198
ENSRNOG00000000576	Anapc16	anaphase promoting complex subunit 16 [Source:RGD Symbol;Acc:2321124]	protein_coding	16	0.58476	337	14.0792
ENSRNOG00000058975	Iqsec2	IQ motif and Sec7 domain 2 [Source:RGD Symbol;Acc:1596452]	protein_coding	73	0.584536	471	6.28061
ENSRNOG00000032605	Rpl32	ribosomal protein L32 [Source:RGD Symbol;Acc:621203]	protein_coding	6	0.582434	493	53.5958
ENSRNOG00000031205	AC136584.1		protein_coding	5	0.581976	3	0.35277
ENSRNOG00000008484	Pdcl	phosducin-like [Source:RGD Symbol;Acc:621135]	protein_coding	38	0.580976	63	1.0688
ENSRNOG00000031540	LOC100362384	ferritin light chain 1-like [Source:RGD Symbol;Acc:2318303]	protein_coding	8	0.580299	2334	205.737
ENSRNOG00000047340	AABR07030265.1		miRNA	2	0.57837	4	1.7197
ENSRNOG00000061121	Wdfy3	WD repeat and FYVE domain containing 3 [Source:RGD Symbol;Acc:1307097]	protein_coding	148	0.571681	2929	12.3711
ENSRNOG00000001682	Ttc3	tetratricopeptide repeat domain 3 [Source:RGD Symbol;Acc:1308654]	protein_coding	76	0.564565	4470	36.4383
ENSRNOG00000051279	AABR07039112.2		processed_pseudogene	26	0.564118	0	0
ENSRNOG00000031273	AABR07034639.1		protein_coding	6	0.563444	95	10.7565
ENSRNOG00000006901	Cd320	CD320 molecule [Source:RGD Symbol;Acc:1305860]	protein_coding	17	0.562163	438	16.4174
ENSRNOG00000009956	Wnk1	WNK lysine deficient protein kinase 1 [Source:RGD Symbol;Acc:621141]	protein_coding	132	0.562064	19871	108.357
ENSRNOG00000012049	Sox7	SRY box 7 [Source:RGD Symbol;Acc:1310038]	protein_coding	41	0.558281	0	0
ENSRNOG00000052620	Rack1	receptor for activated C kinase 1 [Source:RGD Symbol;Acc:69229]	protein_coding	25	0.557095	1499	60.2037
ENSRNOG00000038045	AC128960.1		protein_coding	6	0.555081	67	7.65925
ENSRNOG00000023548	Sned1	sushi, nidogen and EGF-like domains 1 [Source:RGD Symbol;Acc:1566079]	protein_coding	70	0.552226	3916	34.2335
ENSRNOG00000008678	Antxr1	ANTXR cell adhesion molecule 1 [Source:RGD Symbol;Acc:1307144]	protein_coding	41	0.551919	3256	47.8981
ENSRNOG00000019750	Kcna1	potassium voltage-gated channel subfamily A member 1 [Source:RGD Symbol;Acc:2949]	protein_coding	22	0.546784	1037	29.4526
ENSRNOG00000029267	LOC103694169	60S ribosomal protein L39 [Source:RGD Symbol;Acc:9258222]	protein_coding	2	0.539621	14	4.22592
ENSRNOG00000037437	Golga3	golgin A3 [Source:RGD Symbol;Acc:1305262]	protein_coding	69	0.537314	946	8.08971
ENSRNOG00000052159	LOC100910481	MOSC domain-containing protein 2, mitochondrial-like [Source:RGD Symbol;Acc:6498317]	protein_coding	13	0.535794	0	0
ENSRNOG00000013324	Cdh5	cadherin 5 [Source:RGD Symbol;Acc:1307370]	protein_coding	48	0.533335	9698	117.979
ENSRNOG00000054752	7SK	7SK RNA [Source:RFAM;Acc:RF00100]	misc_RNA	5	0.530787	72	10.042
ENSRNOG00000060789	U6	U6 spliceosomal RNA [Source:RFAM;Acc:RF00026]	snRNA	2	0.524809	1	0.009418
ENSRNOG00000034161	Cox6b1	cytochrome c oxidase subunit 6B1 [Source:RGD Symbol;Acc:1584097]	protein_coding	4	0.523829	48	8.89171
ENSRNOG00000008277	Bag1	Bcl2 associated athanogene 1 [Source:RGD Symbol;Acc:1305203]	protein_coding	16	0.522627	334	12.4785
ENSRNOG00000032825	Rpl30	ribosomal protein L30 [Source:RGD Symbol;Acc:621201]	protein_coding	6	0.516733	1550	164.519
ENSRNOG00000002074	Rest	RE1-silencing transcription factor [Source:RGD Symbol;Acc:621069]	protein_coding	49	0.512965	517	7.43106
ENSRNOG00000013547	Slc6a12	solute carrier family 6 member 12 [Source:RGD Symbol;Acc:620255]	protein_coding	31	0.512319	514	10.9634
ENSRNOG00000057752	AABR07012111.1		snoRNA	2	0.510917	0	0
ENSRNOG00000026704	Drp2	dystrophin related protein 2 [Source:RGD Symbol;Acc:621750]	protein_coding	78	0.50854	83450	595.774
ENSRNOG00000060430	Y_RNA	Y RNA [Source:RFAM;Acc:RF00019]	misc_RNA	2	0.506407	0	0
ENSRNOG00000037673	AABR07071891.2		protein_coding	6	0.505672	641	67.5537
ENSRNOG00000004752	Nalcn	sodium leak channel, non-selective [Source:RGD Symbol;Acc:628710]	protein_coding	60	0.504338	1204	11.1176
ENSRNOG00000054017	Hist1h2ao	histone cluster 1, H2ao [Source:RGD Symbol;Acc:1304905]	protein_coding	15	0.502129	156	5.86492
ENSRNOG00000051922	AABR07059663.1		protein_coding	53	0.501718	1144	12.0449
ENSRNOG00000046560	AC109096.1		pseudogene	3	0.497881	9	1.59587
ENSRNOG00000030418	Tmem47	transmembrane protein 47 [Source:RGD Symbol;Acc:1564799]	protein_coding	46	0.497426	2558	30.3117
ENSRNOG00000004496	Rock2	Rho-associated coiled-coil containing protein kinase 2 [Source:RGD Symbol;Acc:3590]	protein_coding	82	0.494714	8248	54.972
ENSRNOG00000010170	Tubb4b	tubulin, beta 4B class IVb [Source:RGD Symbol;Acc:735101]	protein_coding	19	0.493354	1159	34.4199
ENSRNOG00000039562	AABR07033987.1		protein_coding	3	0.492645	10	2.36597
ENSRNOG00000002340	LOC100361079	ribosomal protein L36-like [Source:RGD Symbol;Acc:2320881]	protein_coding	4	0.492596	3	0.404873
ENSRNOG00000002394	Tpr	translocated promoter region, nuclear basket protein [Source:RGD Symbol;Acc:1310664]	protein_coding	83	0.490344	5801	37.7113
ENSRNOG00000059714	LOC103692716	heat shock protein HSP 90-alpha [Source:RGD Symbol;Acc:9292348]	protein_coding	30	0.48338	2065	36.6333
ENSRNOG00000048109	LOC100365839	40S ribosomal protein S3a-like [Source:RGD Symbol;Acc:2318248]	protein_coding	10	0.482285	627	35.5564
ENSRNOG00000061106	U2	U2 spliceosomal RNA [Source:RFAM;Acc:RF00004]	snRNA	3	0.480748	0	0
ENSRNOG00000013875	Fbxl17	F-box and leucine-rich repeat protein 17 [Source:RGD Symbol;Acc:1309773]	protein_coding	23	0.476839	584	13.3694
ENSRNOG00000014445	Hp1bp3	heterochromatin protein 1, binding protein 3 [Source:RGD Symbol;Acc:735099]	protein_coding	23	0.476643	2683	81.8951
ENSRNOG00000060597	Syf2	SYF2 pre-mRNA-splicing factor [Source:RGD Symbol;Acc:621592]	protein_coding	15	0.476526	1141	40.2468
ENSRNOG00000022196	Bmpr2	bone morphogenetic protein receptor type 2 [Source:RGD Symbol;Acc:71082]	protein_coding	42	0.476202	2399	30.3446
ENSRNOG00000003520	Prdx2	peroxiredoxin 2 [Source:RGD Symbol;Acc:3838]	protein_coding	10	0.475714	857	47.8659
ENSRNOG00000050933	Hist1h2ao	histone cluster 1, H2ao [Source:RGD Symbol;Acc:1304905]	protein_coding	4	0.475517	89	13.904
ENSRNOG00000011402	Isg20l2	interferon stimulated exonuclease gene 20-like 2 [Source:RGD Symbol;Acc:1359413]	protein_coding	18	0.474692	89	2.64439
ENSRNOG00000003158	AABR07037343.1		protein_coding	4	0.473911	118	16.2617
ENSRNOG00000008666	Etl4	enhancer trap locus 4 [Source:RGD Symbol;Acc:1563437]	protein_coding	79	0.473885	410	2.70574
ENSRNOG00000027791	AABR07015346.1		processed_pseudogene	3	0.473831	34	6.55512
ENSRNOG00000015560	Emsy	EMSY transcriptional repressor, BRCA2 interacting [Source:RGD Symbol;Acc:1310712]	protein_coding	41	0.472686	890	12.9496
ENSRNOG00000036439	AABR07045454.2		miRNA	2	0.472647	7	3.39861
ENSRNOG00000031079	AABR07066516.1		pseudogene	6	0.472068	100	9.39219
ENSRNOG00000016217	Gtpbp4	GTP binding protein 4 [Source:RGD Symbol;Acc:620783]	protein_coding	32	0.471617	95	1.55038
ENSRNOG00000002338	Dgke	diacylglycerol kinase epsilon [Source:RGD Symbol;Acc:1560914]	protein_coding	32	0.462853	184	2.94315
ENSRNOG00000053210	Zc3h11a	zinc finger CCCH-type containing 11A [Source:RGD Symbol;Acc:1308290]	protein_coding	28	0.456811	1089	19.8
ENSRNOG00000028021	LOC684988	similar to ribosomal protein S13 [Source:RGD Symbol;Acc:1584372]	protein_coding	6	0.456617	252	23.5328
ENSRNOG00000046741	Itsn2	intersectin 2 [Source:RGD Symbol;Acc:1590890]	protein_coding	61	0.456443	1735	14.3386
ENSRNOG00000016686	Tmem167a	transmembrane protein 167A [Source:RGD Symbol;Acc:2323318]	protein_coding	3	0.456063	5	1.07245
ENSRNOG00000048317	Hist2h2ab	histone cluster 2 H2A family member b [Source:RGD Symbol;Acc:1584064]	protein_coding	4	0.452708	5	0.527728
ENSRNOG00000019277	Vdac3	voltage-dependent anion channel 3 [Source:RGD Symbol;Acc:621577]	protein_coding	14	0.451874	1503	53.2009
ENSRNOG00000000888	Sbds	SBDS, ribosome maturation factor [Source:RGD Symbol;Acc:1311043]	protein_coding	15	0.451411	1638	57.4984
ENSRNOG00000029115	AABR07057190.1	60S ribosomal protein L12-like [Source:NCBI gene;Acc:102555453]	protein_coding	8	0.450681	197	13.4153
ENSRNOG00000016460	Clu	clusterin [Source:RGD Symbol;Acc:3907]	protein_coding	18	0.449167	1697	53.0653
ENSRNOG00000049211	AABR07072246.1		miRNA	1	0.448434	1	0.342219
ENSRNOG00000055942	AC120310.1		protein_coding	9	0.447247	153	8.754
ENSRNOG00000060229	Arf1	ADP-ribosylation factor 1 [Source:RGD Symbol;Acc:621270]	protein_coding	9	0.446053	1896	103.403
ENSRNOG00000029082	AABR07005031.1		protein_coding	6	0.445607	313	27.6681
ENSRNOG00000037627	Trappc1	trafficking protein particle complex 1 [Source:RGD Symbol;Acc:1311365]	protein_coding	9	0.44396	710	58.003
ENSRNOG00000010780	Dlc1	DLC1 Rho GTPase activating protein [Source:RGD Symbol;Acc:68416]	protein_coding	8	0.443841	2646	23.3187
ENSRNOG00000013461	Ralbp1	ralA binding protein 1 [Source:RGD Symbol;Acc:621134]	protein_coding	35	0.440659	1670	23.0437
ENSRNOG00000043328	Chmp2a	charged multivesicular body protein 2A [Source:RGD Symbol;Acc:1305050]	protein_coding	10	0.439835	558	29.7412
ENSRNOG00000005542	Apob	apolipoprotein B [Source:RGD Symbol;Acc:2129]	protein_coding	140	0.438534	0	0
ENSRNOG00000007284	Slc2a1	solute carrier family 2 member 1 [Source:RGD Symbol;Acc:3704]	protein_coding	26	0.437403	2441	46.3397
ENSRNOG00000003890	Nap1l1	nucleosome assembly protein 1-like 1 [Source:RGD Symbol;Acc:71094]	protein_coding	21	0.43679	2233	51.9158
ENSRNOG00000029958	RGD1563861	similar to ribosomal protein L10 [Source:RGD Symbol;Acc:1563861]	processed_pseudogene	7	0.432426	72	5.4877
ENSRNOG00000045646	LOC102549173	histone H3.2-like [Source:RGD Symbol;Acc:7709329]	protein_coding	4	0.431429	6	0.673174
ENSRNOG00000052667	AABR07027555.1		processed_pseudogene	7	0.429762	36	2.69654
ENSRNOG00000056825	AABR07072539.4		processed_pseudogene	9	0.425831	150	8.14771
ENSRNOG00000016773	Sap130	Sin3A associated protein 130 [Source:RGD Symbol;Acc:1311657]	protein_coding	40	0.425416	1011	11.9639
ENSRNOG00000056135	Tsc22d3	TSC22 domain family, member 3 [Source:RGD Symbol;Acc:621654]	protein_coding	19	0.423982	429	10.8363
ENSRNOG00000008516	AABR07049516.1		protein_coding	4	0.423671	287	36.5368
ENSRNOG00000057623	Copb1	coatomer protein complex, subunit beta 1 [Source:RGD Symbol;Acc:620861]	protein_coding	32	0.423043	1622	23.8121
ENSRNOG00000012602	Recql	RecQ like helicase [Source:RGD Symbol;Acc:1311071]	protein_coding	23	0.421013	340	6.95995
ENSRNOG00000061544	Spock2	SPARC/osteonectin, cwcv and kazal like domains proteoglycan 2 [Source:RGD Symbol;Acc:1308568]	protein_coding	12	0.41904	41	1.55962
ENSRNOG00000056989	AC130391.5		miRNA	2	0.415323	4	1.09228
ENSRNOG00000053452	LOC100361457	actin, gamma 1 propeptide-like [Source:RGD Symbol;Acc:2320108]	protein_coding	18	0.414951	1680	43.2414
ENSRNOG00000006865	Laptm4a	lysosomal protein transmembrane 4 alpha [Source:RGD Symbol;Acc:735179]	protein_coding	12	0.414939	3350	127.839
ENSRNOG00000051644	AABR07039342.1		snoRNA	2	0.414602	0	0
ENSRNOG00000016303	Zfp236	zinc finger protein 236 [Source:RGD Symbol;Acc:1309670]	protein_coding	55	0.413209	879	7.34308
ENSRNOG00000053714	7SK	7SK RNA [Source:RFAM;Acc:RF00100]	misc_RNA	3	0.411743	7	0.981869
ENSRNOG00000016770	Calm3	calmodulin 3 [Source:RGD Symbol;Acc:2259]	protein_coding	11	0.410619	1905	83.8255
ENSRNOG00000015396	Sptan1	spectrin, alpha, non-erythrocytic 1 [Source:RGD Symbol;Acc:621714]	protein_coding	73	0.410595	19793	124.61
ENSRNOG00000012427	Veph1	ventricular zone expressed PH domain-containing 1 [Source:RGD Symbol;Acc:1308217]	protein_coding	23	0.410497	27	0.428881
ENSRNOG00000059389	AABR07065438.2		scaRNA	3	0.410321	4	0.695246
ENSRNOG00000051966	U4	U4 spliceosomal RNA [Source:RFAM;Acc:RF00015]	snRNA	2	0.406487	0	0
ENSRNOG00000062231	AABR07037451.2	family with sequence similarity 120C [Source:NCBI gene;Acc:317423]	protein_coding	56	0.405342	2248	17.9972
ENSRNOG00000056458	Cep290	centrosomal protein 290 [Source:RGD Symbol;Acc:1311640]	protein_coding	77	0.405304	712	4.10104
ENSRNOG00000052572	Aff2	AF4/FMR2 family, member 2 [Source:RGD Symbol;Acc:1565592]	protein_coding	77	0.403801	191	1.09258
ENSRNOG00000008728	Unc79	unc-79 homolog, NALCN channel complex subunit [Source:RGD Symbol;Acc:1311117]	protein_coding	69	0.402068	11	0.068887
ENSRNOG00000014426	Lox	lysyl oxidase [Source:RGD Symbol;Acc:3015]	protein_coding	41	0.399427	424	4.58391
ENSRNOG00000031313	AC103024.1		protein_coding	4	0.398018	6	0.655986
ENSRNOG00000028341	Alkbh5	alkB homolog 5, RNA demethylase [Source:RGD Symbol;Acc:1309496]	protein_coding	43	0.397154	442	4.52571
ENSRNOG00000047278	AABR07049043.1		pseudogene	7	0.395855	4	0.208611
ENSRNOG00000057754	Tcf12	transcription factor 12 [Source:RGD Symbol;Acc:3829]	protein_coding	23	0.395581	1436	28.5698
ENSRNOG00000032215	Cdyl	chromodomain Y-like [Source:RGD Symbol;Acc:1549745]	protein_coding	20	0.394372	76	1.70288
ENSRNOG00000026985	Phldb1	pleckstrin homology-like domain, family B, member 1 [Source:RGD Symbol;Acc:620878]	protein_coding	49	0.392187	1280	11.3197
ENSRNOG00000017194	Prdx1	peroxiredoxin 1 [Source:RGD Symbol;Acc:620039]	protein_coding	8	0.391526	503	27.6655
ENSRNOG00000051408	Magt1	magnesium transporter 1 [Source:RGD Symbol;Acc:620094]	protein_coding	37	0.390704	2021	23.982
ENSRNOG00000032401	H3f3c	H3 histone family member 3C [Source:RGD Symbol;Acc:2321290]	protein_coding	9	0.390018	382	18.774
ENSRNOG00000057333	AABR07030184.1		snoRNA	2	0.389035	2	0.324253
ENSRNOG00000020730	Nbr1	NBR1, autophagy cargo receptor [Source:RGD Symbol;Acc:69195]	protein_coding	36	0.385527	1131	13.218
ENSRNOG00000054463	AABR07070559.1		pseudogene	4	0.385161	52	7.05293
ENSRNOG00000001494	Napa	NSF attachment protein alpha [Source:RGD Symbol;Acc:620855]	protein_coding	14	0.384552	674	21.4377
ENSRNOG00000033445	AABR07049060.1		processed_transcript	33	0.384053	80	3.46235
ENSRNOG00000043357	Zfp407	zinc finger protein 407 [Source:RGD Symbol;Acc:1310645]	protein_coding	67	0.383235	783	4.90223
ENSRNOG00000000419	Cfb	complement factor B [Source:RGD Symbol;Acc:2204]	protein_coding	25	0.382983	242	3.59175
ENSRNOG00000014230	Map1a	microtubule-associated protein 1A [Source:RGD Symbol;Acc:3042]	protein_coding	95	0.382426	3184	14.5383
ENSRNOG00000005963	Rab2a	RAB2A, member RAS oncogene family [Source:RGD Symbol;Acc:68323]	protein_coding	6	0.379752	664	52.2637
ENSRNOG00000016831	Serpinh1	serpin family H member 1 [Source:RGD Symbol;Acc:69302]	protein_coding	18	0.376779	2149	51.2532
ENSRNOG00000047380	AABR07059563.2		miRNA	1	0.375787	4	3.12532
ENSRNOG00000016589	Mlf2	myeloid leukemia factor 2 [Source:RGD Symbol;Acc:1306294]	protein_coding	13	0.375007	623	20.3987
ENSRNOG00000042387	Slc25a6	solute carrier family 25 member 6 [Source:RGD Symbol;Acc:1560896]	processed_pseudogene	8	0.374137	11	0.567705
ENSRNOG00000054172	Ctnnb1	catenin beta 1 [Source:RGD Symbol;Acc:70487]	protein_coding	21	0.373168	3475	70.7604
ENSRNOG00000009196	Rc3h2	ring finger and CCCH-type domains 2 [Source:RGD Symbol;Acc:1304833]	protein_coding	32	0.372868	1933	24.8164
ENSRNOG00000053928	AC098750.1		pseudogene	3	0.37244	103	15.7737
ENSRNOG00000018102	Coa5	cytochrome C oxidase assembly factor 5 [Source:RGD Symbol;Acc:1565095]	protein_coding	32	0.370191	2476	31.311
ENSRNOG00000021840	Cped1	cadherin-like and PC-esterase domain containing 1 [Source:RGD Symbol;Acc:1563491]	protein_coding	42	0.369947	1052	10.1517
ENSRNOG00000016592	Gnai2	G protein subunit alpha i2 [Source:RGD Symbol;Acc:620243]	protein_coding	19	0.36854	6559	145.689
ENSRNOG00000057955	U2	U2 spliceosomal RNA [Source:RFAM;Acc:RF00004]	snRNA	2	0.367594	0	0
ENSRNOG00000029512	LOC100361854	ribosomal protein S26-like [Source:RGD Symbol;Acc:2319323]	protein_coding	3	0.367138	290	40.7259
ENSRNOG00000023181	RGD1565767	similar to ribosomal protein L15 [Source:RGD Symbol;Acc:1565767]	protein_coding	6	0.365983	2	0.09337
ENSRNOG00000003975	Pfn1	profilin 1 [Source:RGD Symbol;Acc:621825]	protein_coding	7	0.365825	3587	215.09
ENSRNOG00000034150	AABR07041778.1		protein_coding	5	0.365409	175	15.4989
ENSRNOG00000001454	Eif4h	eukaryotic translation initiation factor 4H [Source:RGD Symbol;Acc:1359222]	protein_coding	20	0.364601	1399	28.3525
ENSRNOG00000060559	Scarna10	small Cajal body-specific RNA 10 [Source:MGI Symbol;Acc:MGI:3819482]	snoRNA	3	0.364041	3	0.381971
ENSRNOG00000057838	U1	U1 spliceosomal RNA [Source:RFAM;Acc:RF00003]	snRNA	2	0.364041	1	0.073211
ENSRNOG00000033765	Eif1	eukaryotic translation initiation factor 1 [Source:RGD Symbol;Acc:1306308]	protein_coding	12	0.364037	6421	226.368
ENSRNOG00000025528	Efr3a	EFR3 homolog A [Source:RGD Symbol;Acc:1305976]	protein_coding	43	0.36267	1477	13.6149
ENSRNOG00000058569	7SK	7SK RNA [Source:RFAM;Acc:RF00100]	misc_RNA	3	0.362283	25	3.75359
ENSRNOG00000012207	Dst	dystonin [Source:RGD Symbol;Acc:1306566]	protein_coding	192	0.362157	13186	27.2006
ENSRNOG00000001958	Ift57	intraflagellar transport 57 [Source:RGD Symbol;Acc:1305947]	protein_coding	21	0.360138	191	3.65296
ENSRNOG00000018818	Txnl1	thioredoxin-like 1 [Source:RGD Symbol;Acc:621717]	protein_coding	11	0.359104	387	14.7897
ENSRNOG00000006178	Dync1h1	dynein cytoplasmic 1 heavy chain 1 [Source:RGD Symbol;Acc:2511]	protein_coding	114	0.356933	8791	30.2462
ENSRNOG00000031694	AABR07053188.1		protein_coding	3	0.356782	5	0.641952
ENSRNOG00000032840	Sumo4	small ubiquitin-like modifier 4 [Source:RGD Symbol;Acc:1595256]	protein_coding	8	0.356174	164	8.03654
ENSRNOG00000003689	Nono	non-POU domain containing, octamer-binding [Source:RGD Symbol;Acc:1549738]	protein_coding	21	0.356012	1580	32.1275
ENSRNOG00000027405	Ccp110	centriolar coiled-coil protein 110 [Source:RGD Symbol;Acc:1310509]	protein_coding	39	0.3545	346	3.45707
ENSRNOG00000021794	Znhit2	zinc finger, HIT-type containing 2 [Source:RGD Symbol;Acc:1307918]	protein_coding	11	0.353932	51	1.91535
ENSRNOG00000011980	Lrrc7	leucine rich repeat containing 7 [Source:RGD Symbol;Acc:708527]	protein_coding	41	0.353309	31	0.290511
ENSRNOG00000051852	U1	U1 spliceosomal RNA [Source:RFAM;Acc:RF00003]	snRNA	2	0.352392	1	0.076394
ENSRNOG00000053927	Gm22009	predicted gene, 22009 [Source:MGI Symbol;Acc:MGI:5451786]	scaRNA	3	0.352374	39	5.74908
ENSRNOG00000011614	Tmcc1	transmembrane and coiled-coil domain family 1 [Source:RGD Symbol;Acc:1311909]	protein_coding	16	0.352049	173	4.33865
ENSRNOG00000029682	Clic1	chloride intracellular channel 1 [Source:RGD Symbol;Acc:1303043]	protein_coding	10	0.352001	313	13.0512
ENSRNOG00000054846	AABR07022393.1		protein_coding	12	0.3511	0	0
ENSRNOG00000059957	AABR07021734.1		processed_pseudogene	10	0.346371	7	0.241334
ENSRNOG00000019349	Sf3a2	splicing factor 3a, subunit 2 [Source:RGD Symbol;Acc:1308627]	protein_coding	13	0.34615	152	4.62702
ENSRNOG00000038458	AABR07026240.1		protein_coding	4	0.346103	13	1.22941
ENSRNOG00000058772	U6	U6 spliceosomal RNA [Source:RFAM;Acc:RF00026]	snRNA	1	0.345941	0	0
ENSRNOG00000013579	LOC100359916	heterogeneous nuclear ribonucleoprotein K-like [Source:RGD Symbol;Acc:2323128]	protein_coding	15	0.345931	461	11.7425
ENSRNOG00000048456	LOC100360117	ribosomal protein L8-like [Source:RGD Symbol;Acc:2322732]	protein_coding	6	0.343966	1822	115.169
ENSRNOG00000003261	Usp9x	ubiquitin specific peptidase 9, X-linked [Source:RGD Symbol;Acc:1560056]	protein_coding	93	0.341869	8056	32.9598
ENSRNOG00000008289	Slc25a3	solute carrier family 25 member 3 [Source:RGD Symbol;Acc:70986]	protein_coding	11	0.340399	1401	50.8976
ENSRNOG00000058187	Hist1h2bh	histone cluster 1 H2B family member h [Source:RGD Symbol;Acc:2325039]	protein_coding	3	0.340039	22	2.80039
ENSRNOG00000028449	Rpl9	ribosomal protein L9 [Source:RGD Symbol;Acc:62049]	protein_coding	6	0.338806	786	55.7728
ENSRNOG00000011124	AABR07067267.1		pseudogene	21	0.337584	1826	32.8403
ENSRNOG00000009300	LOC103690017	serine/threonine-protein kinase tousled-like 1 [Source:RGD Symbol;Acc:9355222]	protein_coding	31	0.337444	732	8.80309
ENSRNOG00000020296	LOC103693430	up-regulated during skeletal muscle growth protein 5 [Source:RGD Symbol;Acc:9203006]	protein_coding	2	0.337304	270	74.3778
ENSRNOG00000033199	AABR07068955.1		protein_coding	3	0.335934	3	0.355083
ENSRNOG00000015079	Ddost	dolichyl-diphosphooligosaccharide--protein glycosyltransferase non-catalytic subunit [Source:RGD Symbol;Acc:1308970]	protein_coding	14	0.335533	1084	29.8921
ENSRNOG00000018554	AABR07026797.1		processed_pseudogene	3	0.333428	8	1.11999
ENSRNOG00000057319	Gm47293	predicted gene, 47293 [Source:MGI Symbol;Acc:MGI:6096151]	miRNA	1	0.332655	1	0.208925
ENSRNOG00000012448	Chrnb3	cholinergic receptor nicotinic beta 3 subunit [Source:RGD Symbol;Acc:621544]	protein_coding	25	0.332576	306	4.47806
ENSRNOG00000005015	Rabep1	rabaptin, RAB GTPase binding effector protein 1 [Source:RGD Symbol;Acc:708568]	protein_coding	26	0.332179	1894	26.724
ENSRNOG00000014713	Csgalnact2	chondroitin sulfate N-acetylgalactosaminyltransferase 2 [Source:RGD Symbol;Acc:1563660]	protein_coding	27	0.331682	294	3.94883
ENSRNOG00000049283	AABR07057442.1		miRNA	1	0.330569	1	0.361841
ENSRNOG00000019085	Xpo5	exportin 5 [Source:RGD Symbol;Acc:1311522]	protein_coding	37	0.330564	360	3.57228
ENSRNOG00000030628	Eif4a1	eukaryotic translation initiation factor 4A1 [Source:RGD Symbol;Acc:735141]	protein_coding	14	0.329895	1218	33.6556
ENSRNOG00000009401	Lmo2	LIM domain only 2 [Source:RGD Symbol;Acc:1307101]	protein_coding	12	0.329064	87	2.59783
ENSRNOG00000013878	Hmgxb4	HMG-box containing 4 [Source:RGD Symbol;Acc:1305783]	protein_coding	30	0.328006	581	6.97015
ENSRNOG00000004837	Limd1	LIM domains containing 1 [Source:RGD Symbol;Acc:1309830]	protein_coding	28	0.325508	1327	17.1702
ENSRNOG00000029778	Maob	monoamine oxidase B [Source:RGD Symbol;Acc:3041]	protein_coding	19	0.325348	2688	52.5478
ENSRNOG00000009513	Akr1b1	aldo-keto reductase family 1 member B [Source:RGD Symbol;Acc:2092]	protein_coding	10	0.325286	9258	338.6
ENSRNOG00000029173	AABR07053716.1		protein_coding	3	0.323592	31	4.04076
ENSRNOG00000000779	Znrd1	zinc ribbon domain containing 1 [Source:RGD Symbol;Acc:1303114]	protein_coding	4	0.323246	1088	101.541
ENSRNOG00000016919	Scaf8	SR-related CTD-associated factor 8 [Source:RGD Symbol;Acc:708362]	protein_coding	35	0.320707	1051	12.215
ENSRNOG00000003223	Degs1	delta(4)-desaturase, sphingolipid 1 [Source:RGD Symbol;Acc:70917]	protein_coding	11	0.319495	1949	66.3618
ENSRNOG00000008555	Rps20	ribosomal protein S20 [Source:RGD Symbol;Acc:621037]	protein_coding	3	0.319418	1134	155.379
ENSRNOG00000001613	Zbtb11	zinc finger and BTB domain containing 11 [Source:RGD Symbol;Acc:1308275]	protein_coding	35	0.317404	248	2.48502
ENSRNOG00000032777	AABR07058519.1		protein_coding	4	0.317236	132	14.7424
ENSRNOG00000005447	Ypel2	yippee-like 2 [Source:RGD Symbol;Acc:1311564]	protein_coding	16	0.316981	163	3.66431
ENSRNOG00000001453	Baz1b	bromodomain adjacent to zinc finger domain, 1B [Source:RGD Symbol;Acc:1597089]	protein_coding	48	0.314126	1718	12.2993
ENSRNOG00000010301	Eif4e3	eukaryotic translation initiation factor 4E family member 3 [Source:RGD Symbol;Acc:1586185]	protein_coding	18	0.313487	760	14.8012
ENSRNOG00000048931	AABR07060913.1		miRNA	1	0.313195	1	0.345369
ENSRNOG00000051638	U2	U2 spliceosomal RNA [Source:RFAM;Acc:RF00004]	snRNA	2	0.31258	0	0
ENSRNOG00000050563	Sub1	SUB1 homolog, transcriptional regulator [Source:RGD Symbol;Acc:621582]	protein_coding	6	0.311149	294	18.9753
ENSRNOG00000034206	AC096024.2		protein_coding	2	0.310283	0	0
ENSRNOG00000046615	AABR07064724.1		miRNA	1	0.308794	1839	1124.89
ENSRNOG00000011732	Psmb7	proteasome subunit beta 7 [Source:RGD Symbol;Acc:621093]	protein_coding	8	0.30743	1059	62.0218
ENSRNOG00000050540	AABR07064716.2		miRNA	1	0.306407	1	0.347435
ENSRNOG00000018322	Picalm	phosphatidylinositol binding clathrin assembly protein [Source:RGD Symbol;Acc:621054]	protein_coding	25	0.305889	1701	40.4687
ENSRNOG00000014287	Stk11	serine/threonine kinase 11 [Source:RGD Symbol;Acc:1308653]	protein_coding	22	0.305488	110	1.7232
ENSRNOG00000045963	AABR07027718.1		protein_coding	2	0.304606	5	0.741314
ENSRNOG00000007803	AC132539.1		protein_coding	3	0.302695	11	1.47871
ENSRNOG00000048577	Zfp955a	zinc finger protein 955A [Source:RGD Symbol;Acc:1598322]	protein_coding	28	0.302631	139	3.39899
ENSRNOG00000058437	Hist1h2ai	histone cluster 1, H2ai [Source:RGD Symbol;Acc:2321504]	protein_coding	3	0.302311	77	9.5307
ENSRNOG00000023786	Ybx1	Y box binding protein 1 [Source:RGD Symbol;Acc:61843]	protein_coding	11	0.300631	3359	109.297
ENSRNOG00000060335	Strn3	striatin 3 [Source:RGD Symbol;Acc:621827]	protein_coding	28	0.299736	568	6.69165
ENSRNOG00000061216	Tubb5	tubulin, beta 5 class I [Source:RGD Symbol;Acc:628596]	protein_coding	13	0.299349	1845	63.0493
ENSRNOG00000019346	Tmco3	transmembrane and coiled-coil domains 3 [Source:RGD Symbol;Acc:1306586]	protein_coding	22	0.29621	126	2.01544
ENSRNOG00000010682	Clcn3	chloride voltage-gated channel 3 [Source:RGD Symbol;Acc:621219]	protein_coding	26	0.295843	980	12.59
ENSRNOG00000047326	AABR07057443.1		miRNA	1	0.293179	1	0.300265
ENSRNOG00000020689	Cpeb3	cytoplasmic polyadenylation element binding protein 3 [Source:RGD Symbol;Acc:1564670]	protein_coding	18	0.292337	110	2.0016
ENSRNOG00000020791	Ube2q1	ubiquitin conjugating enzyme E2 Q1 [Source:RGD Symbol;Acc:1305305]	protein_coding	12	0.292232	963	26.0752
ENSRNOG00000046434	Hist1h3b	histone cluster 1, H3b [Source:RGD Symbol;Acc:1591702]	protein_coding	3	0.290524	0	0
ENSRNOG00000031517	AABR07039133.2		processed_pseudogene	3	0.289819	19	2.20626
ENSRNOG00000054586	7SK	7SK RNA [Source:RFAM;Acc:RF00100]	misc_RNA	3	0.288682	85	12.4544
ENSRNOG00000036471	AC120071.1		miRNA	1	0.288052	2	0.630142
ENSRNOG00000057690	Hist1h2ao	histone cluster 1, H2ao [Source:RGD Symbol;Acc:1304905]	protein_coding	2	0.287032	44	6.82093
ENSRNOG00000046227	Tprg1l	tumor protein p63 regulated 1-like [Source:RGD Symbol;Acc:1590079]	protein_coding	12	0.285849	2807	75.6655
ENSRNOG00000057700	Hist1h2an	histone cluster 1, H2an [Source:NCBI gene;Acc:306970]	pseudogene	4	0.285621	0	0
ENSRNOG00000028638	Il10rb	interleukin 10 receptor subunit beta [Source:RGD Symbol;Acc:1560373]	protein_coding	12	0.284787	184	4.97625
ENSRNOG00000001348	Erp29	endoplasmic reticulum protein 29 [Source:RGD Symbol;Acc:619781]	protein_coding	7	0.28467	789	40.7214
ENSRNOG00000051650	Ywhaq	tyrosine 3-monooxygenase/tryptophan 5-monooxygenase activation protein, theta [Source:RGD Symbol;Acc:3979]	protein_coding	14	0.284497	4830	112.593
ENSRNOG00000026917	AABR07021573.2		processed_pseudogene	8	0.283535	49	2.11872
ENSRNOG00000018725	Phkg2	phosphorylase kinase catalytic subunit gamma 2 [Source:RGD Symbol;Acc:620024]	protein_coding	12	0.280954	512	13.6261
ENSRNOG00000057558	AC128792.2		pseudogene	2	0.280427	999	287.524
ENSRNOG00000047167	AABR07029907.2		miRNA	1	0.279196	1	0.326785
ENSRNOG00000056836	Cav1	caveolin 1 [Source:RGD Symbol;Acc:2280]	protein_coding	16	0.278908	9581	183.293
ENSRNOG00000000304	Cd164	CD164 molecule [Source:RGD Symbol;Acc:70942]	protein_coding	18	0.278627	4774	82.8279
ENSRNOG00000019885	Magi3	membrane associated guanylate kinase, WW and PDZ domain containing 3 [Source:RGD Symbol;Acc:621362]	protein_coding	37	0.27845	385	3.21067
ENSRNOG00000045723	AABR07030921.1		miRNA	1	0.277191	2	0.603009
ENSRNOG00000006499	Cops5	COP9 signalosome subunit 5 [Source:RGD Symbol;Acc:1310301]	protein_coding	10	0.276922	679	22.0199
ENSRNOG00000059480	Supt20h	SPT20 homolog, SAGA complex component [Source:RGD Symbol;Acc:1307812]	protein_coding	17	0.275922	439	7.80305
ENSRNOG00000031315	Rpl36a	ribosomal protein L36a [Source:RGD Symbol;Acc:1306640]	protein_coding	2	0.275265	239	36.3943
ENSRNOG00000008816	Gpnmb	glycoprotein nmb [Source:RGD Symbol;Acc:71008]	protein_coding	15	0.275212	2146	45.5424
ENSRNOG00000011029	Sec11a	SEC11 homolog A, signal peptidase complex subunit [Source:RGD Symbol;Acc:69360]	protein_coding	8	0.274901	480	19.5429
ENSRNOG00000045885	LOC100365810	40S ribosomal protein S17-like [Source:RGD Symbol;Acc:2318277]	protein_coding	3	0.274613	243	29.1441
ENSRNOG00000025892	Set	SET nuclear proto-oncogene [Source:RGD Symbol;Acc:1307467]	protein_coding	6	0.273809	495	25.1499
ENSRNOG00000004291	Cltc	clathrin heavy chain [Source:RGD Symbol;Acc:2364]	protein_coding	37	0.272593	6223	50.1784
ENSRNOG00000016467	Kctd1	potassium channel tetramerization domain containing 1 [Source:RGD Symbol;Acc:621566]	protein_coding	21	0.271313	507	7.221
ENSRNOG00000020670	Atrip	ATR interacting protein [Source:RGD Symbol;Acc:1626390]	protein_coding	16	0.270658	137	2.5241
ENSRNOG00000016896	Rpl3	ribosomal protein L3 [Source:RGD Symbol;Acc:735105]	protein_coding	8	0.270232	5678	214.205
ENSRNOG00000000480	Phf1	PHD finger protein 1 [Source:RGD Symbol;Acc:1303205]	protein_coding	13	0.269706	614	10.9365
ENSRNOG00000019113	Hnrnpk	heterogeneous nuclear ribonucleoprotein K [Source:RGD Symbol;Acc:71058]	protein_coding	16	0.268302	2313	54.8786
ENSRNOG00000002509	Gnl3l	G protein nucleolar 3 like [Source:RGD Symbol;Acc:1600217]	protein_coding	28	0.267019	1075	11.5386
ENSRNOG00000013741	Ube2d3	ubiquitin-conjugating enzyme E2D 3 [Source:RGD Symbol;Acc:619912]	protein_coding	10	0.266612	3465	111.153
ENSRNOG00000019090	Cct3	chaperonin containing TCP1 subunit 3 [Source:RGD Symbol;Acc:735038]	protein_coding	13	0.266196	357	8.98737
ENSRNOG00000020173	Tie1	tyrosine kinase with immunoglobulin-like and EGF-like domains 1 [Source:RGD Symbol;Acc:621642]	protein_coding	13	0.265705	100	1.20781
ENSRNOG00000011946	Ptn	pleiotrophin [Source:RGD Symbol;Acc:3444]	protein_coding	8	0.26568	5854	218.694
ENSRNOG00000013292	AC117101.1		protein_coding	3	0.264019	44	4.77
ENSRNOG00000039876	LOC681410	hypothetical protein LOC681410 [Source:RGD Symbol;Acc:1595414]	protein_coding	6	0.262481	0	0
ENSRNOG00000054890	Flna	filamin A [Source:RGD Symbol;Acc:1560614]	protein_coding	50	0.261788	4200	24.4344
ENSRNOG00000015865	Ap2s1	adaptor related protein complex 2 subunit sigma 1 [Source:RGD Symbol;Acc:620188]	protein_coding	6	0.261567	267	14.2696
ENSRNOG00000037514	Qser1	glutamine and serine rich 1 [Source:RGD Symbol;Acc:1311804]	protein_coding	53	0.260034	4062	22.0115
ENSRNOG00000018853	Slc28a3	solute carrier family 28 member 3 [Source:RGD Symbol;Acc:621224]	protein_coding	15	0.259934	0	0
ENSRNOG00000017851	Etfb	electron transfer flavoprotein subunit beta [Source:RGD Symbol;Acc:1303312]	protein_coding	6	0.25972	320	17.2102
ENSRNOG00000009609	LOC299312	similar to G protein-binding protein CRFG [Source:RGD Symbol;Acc:1594558]	pseudogene	12	0.259309	14	0.341828
ENSRNOG00000042838	Junb	JunB proto-oncogene, AP-1 transcription factor subunit [Source:RGD Symbol;Acc:2944]	protein_coding	11	0.258835	55	1.50379
ENSRNOG00000016444	AABR07067506.1		processed_pseudogene	3	0.257161	16	1.6617
ENSRNOG00000061099	AABR07033324.1		protein_coding	10	0.256968	1190	34.2323
ENSRNOG00000018145	Crat	carnitine O-acetyltransferase [Source:RGD Symbol;Acc:1303031]	protein_coding	13	0.256765	391	8.73763
ENSRNOG00000030807	LOC100912427	nuclease-sensitive element-binding protein 1-like [Source:RGD Symbol;Acc:6486912]	processed_pseudogene	6	0.255898	579	29.2415
ENSRNOG00000057396	AABR07005581.1		pseudogene	30	0.253178	0	0
ENSRNOG00000019352	Emc6	ER membrane protein complex subunit 6 [Source:RGD Symbol;Acc:1309231]	protein_coding	3	0.252978	8	0.293279
ENSRNOG00000023896	Dusp6	dual specificity phosphatase 6 [Source:RGD Symbol;Acc:70978]	protein_coding	16	0.251471	469	8.32443
ENSRNOG00000025157	AABR07008904.1		protein_coding	4	0.250538	24	1.72941
ENSRNOG00000059641	AC139445.2	similar to polyamine oxidase isoform 2 [Source:NCBI gene;Acc:501620]	processed_pseudogene	10	0.250193	30	0.854984
ENSRNOG00000005513	Srsf5	serine and arginine rich splicing factor 5 [Source:RGD Symbol;Acc:3664]	protein_coding	7	0.24893	1218	50.492
ENSRNOG00000017294	Zranb1	zinc finger RANBP2-type containing 1 [Source:RGD Symbol;Acc:2321751]	protein_coding	15	0.248171	206	3.98554
ENSRNOG00000033790	Hnrnpu	heterogeneous nuclear ribonucleoprotein U [Source:RGD Symbol;Acc:620372]	protein_coding	19	0.247809	2918	42.9679
ENSRNOG00000027204	Map6	microtubule-associated protein 6 [Source:RGD Symbol;Acc:61804]	protein_coding	20	0.247222	116	1.61265
ENSRNOG00000015295	Ctdsp1	CTD small phosphatase 1 [Source:RGD Symbol;Acc:1305629]	protein_coding	7	0.246825	3651	82.8514
ENSRNOG00000013493	Psma4	proteasome subunit alpha 4 [Source:RGD Symbol;Acc:61846]	protein_coding	8	0.246107	309	11.4064
ENSRNOG00000021403	Rhob	ras homolog family member B [Source:RGD Symbol;Acc:621309]	protein_coding	12	0.245948	4385	98.6676
ENSRNOG00000001893	LOC100362453	serine/threonine-protein phosphatase 2A catalytic subunit alpha-like [Source:RGD Symbol;Acc:2318135]	protein_coding	10	0.24589	160	4.32892
ENSRNOG00000016576	Carmil1	capping protein regulator and myosin 1 linker 1 [Source:RGD Symbol;Acc:1306623]	protein_coding	30	0.244468	320	2.94384
ENSRNOG00000001256	Atxn2	ataxin 2 [Source:RGD Symbol;Acc:1306637]	protein_coding	20	0.244105	1971	26.397
ENSRNOG00000056256	U2	U2 spliceosomal RNA [Source:RFAM;Acc:RF00004]	snRNA	2	0.243812	0	0
ENSRNOG00000048073	LOC103690821	60S ribosomal protein L39 [Source:RGD Symbol;Acc:9350894]	protein_coding	1	0.243021	39	11.9493
ENSRNOG00000050393	LOC103690821	60S ribosomal protein L39 [Source:RGD Symbol;Acc:9350894]	protein_coding	1	0.243021	19	5.70758
ENSRNOG00000059976	U2	U2 spliceosomal RNA [Source:RFAM;Acc:RF00004]	snRNA	2	0.242562	0	0
ENSRNOG00000055272	AABR07044405.1		miRNA	1	0.242542	1	0.337246
ENSRNOG00000031864	AABR07021871.1		protein_coding	5	0.242514	61	3.42998
ENSRNOG00000025602	Cdk4	cyclin-dependent kinase 4 [Source:RGD Symbol;Acc:621120]	protein_coding	5	0.241693	364	19.5128
ENSRNOG00000010218	NEWGENE_619861	eukaryotic translation initiation factor 5 [Source:RGD Symbol;Acc:11471634]	protein_coding	19	0.24077	1810	25.2711
ENSRNOG00000008101	Tmem251	transmembrane protein 251 [Source:RGD Symbol;Acc:1566396]	protein_coding	3	0.240267	39	3.8449
ENSRNOG00000005389	Ppp2ca	protein phosphatase 2 catalytic subunit alpha [Source:RGD Symbol;Acc:3380]	protein_coding	5	0.238811	106	5.52941
ENSRNOG00000046183	AABR07055280.1		processed_pseudogene	7	0.238562	1136	43.4889
ENSRNOG00000019980	Tomm20	translocase of outer mitochondrial membrane 20 [Source:RGD Symbol;Acc:708467]	protein_coding	6	0.237592	817	40.7914
ENSRNOG00000018561	Pprc1	PPARG related coactivator 1 [Source:RGD Symbol;Acc:1309688]	protein_coding	29	0.235654	391	3.56043
ENSRNOG00000018304	Lars	leucyl-tRNA synthetase [Source:RGD Symbol;Acc:1304962]	protein_coding	21	0.235149	1095	13.8911
ENSRNOG00000011302	Rab11a	RAB11a, member RAS oncogene family [Source:RGD Symbol;Acc:619762]	protein_coding	12	0.233891	916	19.8028
ENSRNOG00000009614	LOC300249	similar to 60S ribosomal protein L4 (L1) [Source:RGD Symbol;Acc:1583853]	processed_pseudogene	7	0.233229	960	37.2113
ENSRNOG00000033748	AABR07060610.1		pseudogene	3	0.232346	171	17.0285
ENSRNOG00000028566	Pld4	phospholipase D family, member 4 [Source:RGD Symbol;Acc:1598308]	protein_coding	11	0.232327	337	8.28763
ENSRNOG00000039017	Naa50	N(alpha)-acetyltransferase 50, NatE catalytic subunit [Source:RGD Symbol;Acc:1310944]	protein_coding	25	0.231781	645	12.6637
ENSRNOG00000061533	AABR07001926.3		protein_coding	12	0.231125	6	0.115806
ENSRNOG00000003399	Hnrnph1	heterogeneous nuclear ribonucleoprotein H1 [Source:RGD Symbol;Acc:620840]	protein_coding	11	0.230273	1165	29.0641
ENSRNOG00000020771	RGD1561590	similar to SAP18 [Source:RGD Symbol;Acc:1561590]	protein_coding	3	0.230068	49	4.54385
ENSRNOG00000031381	AC129049.1		protein_coding	4	0.229285	105	6.58962
ENSRNOG00000045636	Fasn	fatty acid synthase [Source:RGD Symbol;Acc:620665]	protein_coding	47	0.229234	2519	13.489
ENSRNOG00000048193	Hnrnph3	heterogeneous nuclear ribonucleoprotein H3 [Source:RGD Symbol;Acc:1310019]	protein_coding	8	0.229172	599	23.8867
ENSRNOG00000021133	Lsm14a	LSM14A mRNA processing body assembly factor [Source:RGD Symbol;Acc:1305695]	protein_coding	15	0.228781	1675	57.2614
ENSRNOG00000021144	Cebpg	CCAAT/enhancer binding protein gamma [Source:RGD Symbol;Acc:2330]	protein_coding	18	0.228537	278	3.97994
ENSRNOG00000046768	AC135454.2		miRNA	1	0.228488	1	0.19293
ENSRNOG00000008301	Tagln2	transgelin 2 [Source:RGD Symbol;Acc:1310840]	protein_coding	7	0.226935	1289	48.608
ENSRNOG00000052174	LOC100361920	dynein light chain 1-like [Source:RGD Symbol;Acc:2319160]	protein_coding	2	0.226649	17	2.90015
ENSRNOG00000024632	Atf6	activating transcription factor 6 [Source:RGD Symbol;Acc:1305471]	protein_coding	24	0.226626	1397	14.5904
ENSRNOG00000002342	Aldh3a2	aldehyde dehydrogenase 3 family, member A2 [Source:RGD Symbol;Acc:61866]	protein_coding	16	0.226618	1550	25.5468
ENSRNOG00000050519	Rhoa	ras homolog family member A [Source:RGD Symbol;Acc:619921]	protein_coding	8	0.22577	8332	257.414
ENSRNOG00000000473	Pfdn6	prefoldin subunit 6 [Source:RGD Symbol;Acc:1303006]	protein_coding	4	0.224723	77	5.37979
ENSRNOG00000011489	R3hdm4	R3H domain containing 4 [Source:RGD Symbol;Acc:1307067]	protein_coding	9	0.224429	2432	66.7099
ENSRNOG00000016810	Stmn1	stathmin 1 [Source:RGD Symbol;Acc:2992]	protein_coding	6	0.22431	3779	189.508
ENSRNOG00000002475	AABR07058831.1		processed_pseudogene	3	0.223166	10	0.862502
ENSRNOG00000005641	Fbxl4	F-box and leucine-rich repeat protein 4 [Source:RGD Symbol;Acc:1305724]	protein_coding	16	0.222422	310	6.10742
ENSRNOG00000033217	Esam	endothelial cell adhesion molecule [Source:RGD Symbol;Acc:1303286]	protein_coding	10	0.222284	103	2.6931
ENSRNOG00000017708	AABR07073038.1	poly(rC) binding protein 1 [Source:NCBI gene;Acc:500242]	pseudogene	6	0.222072	510	23.2857
ENSRNOG00000014562	Hnrnpf	heterogeneous nuclear ribonucleoprotein F [Source:RGD Symbol;Acc:620366]	protein_coding	12	0.222044	339	7.4271
ENSRNOG00000003650	Nt5c	5', 3'-nucleotidase, cytosolic [Source:RGD Symbol;Acc:2321875]	protein_coding	4	0.221538	0	0
ENSRNOG00000004925	Ppp1r12a	protein phosphatase 1, regulatory subunit 12A [Source:RGD Symbol;Acc:620013]	protein_coding	29	0.220747	1925	18.7802
ENSRNOG00000007324	Plxna2	plexin A2 [Source:RGD Symbol;Acc:1305325]	protein_coding	55	0.219637	597	2.6396
ENSRNOG00000056851	AABR07041779.2		protein_coding	6	0.219448	0	0
ENSRNOG00000010652	Dock6	dedicator of cytokinesis 6 [Source:RGD Symbol;Acc:1306517]	protein_coding	34	0.218363	2231	16.5249
ENSRNOG00000061554	Snord85	small nucleolar RNA, C/D box 85 [Source:MGI Symbol;Acc:MGI:3819558]	snoRNA	1	0.217834	0	0
ENSRNOG00000051031	AABR07038842.1		processed_pseudogene	4	0.21744	1	0.049001
ENSRNOG00000061320	LOC103692829	60S ribosomal protein L9 pseudogene [Source:RGD Symbol;Acc:9187595]	protein_coding	3	0.21691	516	44.4643
ENSRNOG00000049575	Atn1	atrophin 1 [Source:RGD Symbol;Acc:61832]	protein_coding	22	0.216245	1236	13.8218
ENSRNOG00000012061	Prkcb	protein kinase C, beta [Source:RGD Symbol;Acc:3396]	protein_coding	11	0.216165	291	7.0392
ENSRNOG00000032289	AABR07067814.1		protein_coding	5	0.214684	2	0.092517
ENSRNOG00000002755	Pafah1b1	platelet-activating factor acetylhydrolase 1b, regulatory subunit 1 [Source:RGD Symbol;Acc:620331]	protein_coding	10	0.214635	4248	37.3959
ENSRNOG00000030351	AABR07006627.1		unprocessed_pseudogene	4	0.214188	154	11.5984
ENSRNOG00000048558	AABR07046765.1		miRNA	1	0.214107	1	0.210939
ENSRNOG00000060836	U1	U1 spliceosomal RNA [Source:RFAM;Acc:RF00003]	snRNA	1	0.213483	0	0
ENSRNOG00000019568	Jund	JunD proto-oncogene, AP-1 transcription factor subunit [Source:RGD Symbol;Acc:2945]	protein_coding	8	0.21264	292	8.48995
ENSRNOG00000005811	LOC688655	similar to heat shock protein 8 [Source:RGD Symbol;Acc:1586445]	pseudogene	10	0.211416	1239	31.2325
ENSRNOG00000003834	Map2k4	mitogen activated protein kinase kinase 4 [Source:RGD Symbol;Acc:1307040]	protein_coding	6	0.211314	33	1.43976
ENSRNOG00000020246	Myl9	myosin light chain 9 [Source:RGD Symbol;Acc:1311235]	protein_coding	6	0.210366	866	38.3807
ENSRNOG00000011111	Cipc	CLOCK-interacting pacemaker [Source:RGD Symbol;Acc:1309492]	protein_coding	19	0.209101	377	4.62863
ENSRNOG00000009658	Rnf19a	ring finger protein 19A, RBR E3 ubiquitin protein ligase [Source:RGD Symbol;Acc:1307807]	protein_coding	20	0.208896	1080	12.6221
ENSRNOG00000046020	AC115277.2		miRNA	1	0.208396	24	10.7806
ENSRNOG00000030476	LOC100360449	ribosomal protein L9-like [Source:RGD Symbol;Acc:2322107]	protein_coding	3	0.206485	643	54.27
ENSRNOG00000047339	Pja1	praja ring finger ubiquitin ligase 1 [Source:RGD Symbol;Acc:1591532]	protein_coding	5	0.205399	471	12.4896
ENSRNOG00000059017	AC106292.2		protein_coding	6	0.205082	907	38.6599
ENSRNOG00000001720	Hes1	hes family bHLH transcription factor 1 [Source:RGD Symbol;Acc:62081]	protein_coding	7	0.205073	238	8.04461
ENSRNOG00000009761	Tmod1	tropomodulin 1 [Source:RGD Symbol;Acc:3874]	protein_coding	12	0.204491	91	1.74861
ENSRNOG00000060045	Pi4ka	phosphatidylinositol 4-kinase alpha [Source:RGD Symbol;Acc:621213]	protein_coding	30	0.203903	1320	9.80382
ENSRNOG00000014816	Slc1a1	solute carrier family 1 member 1 [Source:RGD Symbol;Acc:3696]	protein_coding	17	0.202629	421	5.50739
ENSRNOG00000055661	AABR07065420.1	similar to importin 11 [Source:NCBI gene;Acc:314407]	pseudogene	14	0.202347	76	1.26017
ENSRNOG00000054296	Hist1h2bo	histone cluster 1 H2B family member o [Source:RGD Symbol;Acc:1311828]	protein_coding	3	0.202336	71	5.34251
ENSRNOG00000017800	Foxc1	forkhead box C1 [Source:RGD Symbol;Acc:1589718]	protein_coding	18	0.20211	1556	19.126
ENSRNOG00000005335	Galnt13	polypeptide N-acetylgalactosaminyltransferase 13 [Source:RGD Symbol;Acc:735044]	protein_coding	10	0.201743	20	0.443687
ENSRNOG00000013977	Bzw1	basic leucine zipper and W2 domains 1 [Source:RGD Symbol;Acc:735129]	protein_coding	9	0.201585	288	7.92295
ENSRNOG00000059538	Clec2g	C-type lectin domain family 2, member G [Source:RGD Symbol;Acc:1563148]	protein_coding	9	0.200338	3888	170.541
ENSRNOG00000027514	Ube2m	ubiquitin-conjugating enzyme E2M [Source:RGD Symbol;Acc:1307614]	protein_coding	9	0.199516	263	6.54279
ENSRNOG00000049703	AABR07010706.1		miRNA	1	0.199278	1	0.437375
ENSRNOG00000022227	AABR07002564.1		processed_pseudogene	2	0.199009	2	0.203774
ENSRNOG00000017119	Ciao2a	cytosolic iron-sulfur assembly component 2A [Source:RGD Symbol;Acc:1307481]	protein_coding	6	0.197486	159	6.60115
ENSRNOG00000015679	Dok4	docking protein 4 [Source:RGD Symbol;Acc:1310084]	protein_coding	7	0.19574	461	14.7952
ENSRNOG00000015101	Mak	male germ cell-associated kinase [Source:RGD Symbol;Acc:3036]	protein_coding	15	0.19532	0	0
ENSRNOG00000002360	Gabrg1	gamma-aminobutyric acid type A receptor gamma 1 subunit [Source:RGD Symbol;Acc:621732]	protein_coding	8	0.194885	5	0.1127
ENSRNOG00000017127	Rpl28	ribosomal protein L28 [Source:RGD Symbol;Acc:621193]	protein_coding	7	0.19459	4353	139.143
ENSRNOG00000016137	Rad23b	RAD23 homolog B, nucleotide excision repair protein [Source:RGD Symbol;Acc:1562958]	protein_coding	12	0.192157	1157	20.5203
ENSRNOG00000051891	Hist1h2ao	histone cluster 1, H2ao [Source:RGD Symbol;Acc:1304905]	protein_coding	2	0.191355	543	85.072
ENSRNOG00000055257	Selenof	selenoprotein F [Source:RGD Symbol;Acc:621291]	protein_coding	7	0.191128	1569	50.6743
ENSRNOG00000026277	Zc3h6	zinc finger CCCH type containing 6 [Source:RGD Symbol;Acc:1311061]	protein_coding	23	0.190299	171	1.5638
ENSRNOG00000036688	Arhgdia	Rho GDP dissociation inhibitor alpha [Source:RGD Symbol;Acc:1359547]	protein_coding	8	0.189905	10611	276.213
ENSRNOG00000031285	AABR07064305.1		processed_pseudogene	3	0.189532	0	0
ENSRNOG00000025731	Ptma	prothymosin alpha [Source:RGD Symbol;Acc:61829]	protein_coding	4	0.188227	552	35.2637
ENSRNOG00000010635	Igfbp4	insulin-like growth factor binding protein 4 [Source:RGD Symbol;Acc:2875]	protein_coding	10	0.187943	24	0.532283
ENSRNOG00000019063	Fbxo38	F-box protein 38 [Source:RGD Symbol;Acc:1311505]	protein_coding	19	0.187875	519	5.79442
ENSRNOG00000056349	U2	U2 spliceosomal RNA [Source:RFAM;Acc:RF00004]	snRNA	1	0.187548	0	0
ENSRNOG00000004554	Dcn	decorin [Source:RGD Symbol;Acc:61895]	protein_coding	8	0.187252	46211	1214.58
ENSRNOG00000005763	Arl1	ADP-ribosylation factor like GTPase 1 [Source:RGD Symbol;Acc:621326]	protein_coding	4	0.186136	98	5.07812
ENSRNOG00000001627	Abi3bp	ABI family member 3 binding protein [Source:RGD Symbol;Acc:1562717]	protein_coding	15	0.185449	6534	101.074
ENSRNOG00000045767	AABR07070238.2		protein_coding	2	0.185412	6	0.530944
ENSRNOG00000034242	Vcp	valosin-containing protein [Source:RGD Symbol;Acc:621595]	protein_coding	14	0.185239	1315	20.1354
ENSRNOG00000061887	7SK	7SK RNA [Source:RFAM;Acc:RF00100]	misc_RNA	2	0.184838	13	1.85861
ENSRNOG00000008461	Smdt1	single-pass membrane protein with aspartate-rich tail 1 [Source:RGD Symbol;Acc:1311310]	protein_coding	2	0.184268	525	79.1983
ENSRNOG00000042869	Atp5md	ATP synthase membrane subunit DAPIT [Source:RGD Symbol;Acc:631426]	protein_coding	2	0.184148	37	5.78276
ENSRNOG00000061083	U2	U2 spliceosomal RNA [Source:RFAM;Acc:RF00004]	snRNA	1	0.183797	0	0
ENSRNOG00000054408	AABR07021687.1		pseudogene	3	0.183569	8	0.563552
ENSRNOG00000059709	AABR07021691.2		pseudogene	3	0.183569	2	0.123074
ENSRNOG00000013502	Eps15l1	epidermal growth factor receptor pathway substrate 15-like 1 [Source:RGD Symbol;Acc:1565708]	protein_coding	14	0.182969	370	5.64688
ENSRNOG00000054342	Metazoa_SRP	Metazoan signal recognition particle RNA [Source:RFAM;Acc:RF00017]	misc_RNA	2	0.182892	0	0
ENSRNOG00000043006	Epm2aip1	EPM2A interacting protein 1 [Source:RGD Symbol;Acc:1310977]	protein_coding	31	0.182869	2566	17.0873
ENSRNOG00000059490	RNaseP_nuc	Nuclear RNase P [Source:RFAM;Acc:RF00009]	ribozyme	2	0.18202	0	0
ENSRNOG00000046144	Hist1h2ail1	histone cluster 1 H2a family member I like 1 [Source:RGD Symbol;Acc:1311554]	protein_coding	2	0.181577	0	0
ENSRNOG00000002397	Slc30a10	solute carrier family 30, member 10 [Source:RGD Symbol;Acc:1305098]	protein_coding	24	0.180194	1274	10.6961
ENSRNOG00000038205	Gng5	G protein subunit gamma 5 [Source:RGD Symbol;Acc:620807]	protein_coding	1	0.179781	48	11.215
ENSRNOG00000056106	Dip2b	disco-interacting protein 2 homolog B [Source:RGD Symbol;Acc:1305671]	protein_coding	29	0.179059	897	6.07478
ENSRNOG00000018181	Stk25	serine/threonine kinase 25 [Source:RGD Symbol;Acc:727809]	protein_coding	8	0.177946	553	13.4947
ENSRNOG00000047185	AABR07049994.1		protein_coding	4	0.176831	288	14.1466
ENSRNOG00000042492	Cop1	COP1, E3 ubiquitin ligase [Source:RGD Symbol;Acc:1304773]	protein_coding	14	0.176362	1099	19.6177
ENSRNOG00000010668	Anxa6	annexin A6 [Source:RGD Symbol;Acc:621172]	protein_coding	11	0.176136	1958	36.4892
ENSRNOG00000019381	Eri3	ERI1 exoribonuclease family member 3 [Source:RGD Symbol;Acc:1595859]	protein_coding	6	0.175682	133	5.48601
ENSRNOG00000032847	AABR07060145.1		protein_coding	1	0.175651	24	5.45969
ENSRNOG00000060512	AABR07035541.2		pseudogene	2	0.175596	0	0
ENSRNOG00000002496	Stxbp5l	syntaxin binding protein 5-like [Source:RGD Symbol;Acc:1311561]	protein_coding	13	0.175136	117	1.74039
ENSRNOG00000030314	Golgb1	golgin B1 [Source:RGD Symbol;Acc:708429]	protein_coding	43	0.175044	2508	11.3163
ENSRNOG00000028630	Ksr2	kinase suppressor of ras 2 [Source:RGD Symbol;Acc:1562674]	protein_coding	12	0.174912	150	2.54259
ENSRNOG00000017120	Abhd2	abhydrolase domain containing 2 [Source:RGD Symbol;Acc:1311389]	protein_coding	8	0.174711	124	2.97631
ENSRNOG00000033603	AABR07034315.1		protein_coding	2	0.174133	58	6.84681
ENSRNOG00000033916	AC141489.1		protein_coding	2	0.17406	137	19.5304
ENSRNOG00000013255	Dnajc8	DnaJ heat shock protein family (Hsp40) member C8 [Source:RGD Symbol;Acc:1306024]	protein_coding	7	0.17394	2469	86.7695
ENSRNOG00000021681	Eea1	early endosome antigen 1 [Source:RGD Symbol;Acc:1310167]	protein_coding	19	0.173607	1789	19.8885
ENSRNOG00000023993	Kif1a	kinesin family member 1A [Source:RGD Symbol;Acc:1304996]	protein_coding	23	0.173451	5771	49.2796
ENSRNOG00000030299	AABR07024742.1		processed_pseudogene	2	0.172551	8	0.736772
ENSRNOG00000015496	Tpm4	tropomyosin 4 [Source:RGD Symbol;Acc:3899]	protein_coding	4	0.171916	5516	265.577
ENSRNOG00000009920	LOC680121	similar to heat shock protein 8 [Source:RGD Symbol;Acc:1595502]	protein_coding	9	0.171574	1585	36.9262
ENSRNOG00000005292	Trip11	thyroid hormone receptor interactor 11 [Source:RGD Symbol;Acc:1586166]	protein_coding	32	0.171427	3835	22.4777
ENSRNOG00000017506	Cltb	clathrin, light chain B [Source:RGD Symbol;Acc:621353]	protein_coding	5	0.171068	755	35.263
ENSRNOG00000046533	AABR07043421.1	cold shock domain-containing protein E1-like [Source:NCBI gene;Acc:100364335]	pseudogene	11	0.170733	1802	31.8026
ENSRNOG00000015143	Siah1	siah E3 ubiquitin protein ligase 1 [Source:RGD Symbol;Acc:620449]	protein_coding	8	0.17017	132	3.0964
ENSRNOG00000033979	Gm5471	predicted pseudogene 5471 [Source:RGD Symbol;Acc:1560994]	processed_pseudogene	2	0.169914	257	36.672
ENSRNOG00000058145	7SK	7SK RNA [Source:RFAM;Acc:RF00100]	misc_RNA	2	0.166817	3	0.362732
ENSRNOG00000012702	Nfya	nuclear transcription factor Y subunit alpha [Source:RGD Symbol;Acc:70976]	protein_coding	6	0.166122	297	4.27499
ENSRNOG00000021110	Mllt11	MLLT11, transcription factor 7 cofactor [Source:RGD Symbol;Acc:1305525]	protein_coding	6	0.165768	168	6.00857
ENSRNOG00000019778	Cavin1	caveolae associated protein 1 [Source:RGD Symbol;Acc:1307685]	protein_coding	12	0.165179	8391	128.08
ENSRNOG00000062275	AC133400.1		processed_pseudogene	3	0.164925	4	0.265881
ENSRNOG00000032902	Ybx1-ps3	Y box protein 1 related, pseudogene 3 [Source:RGD Symbol;Acc:1590933]	protein_coding	6	0.164624	1156	37.716
ENSRNOG00000045558	Cd34	CD34 molecule [Source:RGD Symbol;Acc:1306863]	protein_coding	7	0.164179	0	0
ENSRNOG00000050323	Srsf1	serine and arginine rich splicing factor 1 [Source:RGD Symbol;Acc:1587490]	protein_coding	19	0.163285	456	4.38209
ENSRNOG00000009183	Szrd1	SUZ RNA binding domain containing 1 [Source:RGD Symbol;Acc:1560286]	protein_coding	12	0.163243	552	8.29249
ENSRNOG00000009354	Nrarp	Notch-regulated ankyrin repeat protein [Source:RGD Symbol;Acc:1591939]	protein_coding	10	0.163145	0	0
ENSRNOG00000017884	AABR07006160.1		processed_pseudogene	3	0.162825	51	3.43434
ENSRNOG00000015953	Oaz2	ornithine decarboxylase antizyme 2 [Source:RGD Symbol;Acc:1562933]	protein_coding	3	0.161596	164	14.08
ENSRNOG00000007111	Nrdc	nardilysin convertase [Source:RGD Symbol;Acc:3210]	protein_coding	15	0.160811	2708	32.3619
ENSRNOG00000002671	Nme2	NME/NM23 nucleoside diphosphate kinase 2 [Source:RGD Symbol;Acc:619877]	protein_coding	3	0.160061	767	50.288
ENSRNOG00000001223	Pttg1ip	PTTG1 interacting protein [Source:RGD Symbol;Acc:1305983]	protein_coding	10	0.159997	4208	80.088
ENSRNOG00000000204	Syncrip	synaptotagmin binding, cytoplasmic RNA interacting protein [Source:RGD Symbol;Acc:1305683]	protein_coding	8	0.15976	1475	34.4287
ENSRNOG00000052802	Aldoa	aldolase, fructose-bisphosphate A [Source:RGD Symbol;Acc:2089]	protein_coding	6	0.158158	2281	77.8537
ENSRNOG00000018804	Ripor2	RHO family interacting cell polarization regulator 2 [Source:RGD Symbol;Acc:1306939]	protein_coding	14	0.158127	1148	14.2848
ENSRNOG00000032947	AABR07067749.1		protein_coding	2	0.157944	4	0.441928
ENSRNOG00000018184	Tpm1	tropomyosin 1 [Source:RGD Symbol;Acc:3898]	protein_coding	7	0.157295	1065	33.1725
ENSRNOG00000055512	Hist1h2bk	histone cluster 1 H2B family member k [Source:RGD Symbol;Acc:1593016]	protein_coding	2	0.1567	28	3.54869
ENSRNOG00000032885	Cycs	cytochrome c, somatic [Source:RGD Symbol;Acc:2451]	protein_coding	2	0.156454	122	18.6294
ENSRNOG00000055264	AABR07024291.1		miRNA	1	0.15598	1	0.205754
ENSRNOG00000014204	Pacsin3	protein kinase C and casein kinase substrate in neurons 3 [Source:RGD Symbol;Acc:1307327]	protein_coding	7	0.155938	495	14.001
ENSRNOG00000050081	AABR07038269.1		processed_pseudogene	2	0.155677	0	0
ENSRNOG00000054840	AABR07053837.1		pseudogene	2	0.155367	7	0.904389
ENSRNOG00000020047	Tut1	terminal uridylyl transferase 1, U6 snRNA-specific [Source:RGD Symbol;Acc:1561043]	protein_coding	10	0.154615	89	1.51672
ENSRNOG00000016719	Zfp161	zinc finger protein 161 [Source:RGD Symbol;Acc:628712]	protein_coding	13	0.153635	124	1.66745
ENSRNOG00000062303	AABR07072539.7		processed_pseudogene	1	0.153521	0	0
ENSRNOG00000025695	Tns3	tensin 3 [Source:RGD Symbol;Acc:1564174]	protein_coding	26	0.153142	8899	58.7295
ENSRNOG00000004791	Arf6	ADP-ribosylation factor 6 [Source:RGD Symbol;Acc:621279]	protein_coding	4	0.15251	425	18.1259
ENSRNOG00000045535	Rtl8a	retrotransposon Gag like 8A [Source:RGD Symbol;Acc:1593086]	transcribed_processed_pseudogene	2	0.152357	703	27.9684
ENSRNOG00000006770	Brd4	bromodomain containing 4 [Source:RGD Symbol;Acc:1307282]	protein_coding	24	0.151526	2272	15.827
ENSRNOG00000011661	Hnrnph2	heterogeneous nuclear ribonucleoprotein H2 [Source:RGD Symbol;Acc:1549784]	protein_coding	6	0.151247	588	18.2639
ENSRNOG00000050298	Rfng	RFNG O-fucosylpeptide 3-beta-N-acetylglucosaminyltransferase [Source:RGD Symbol;Acc:621322]	protein_coding	6	0.15048	40	1.23064
ENSRNOG00000053635	Zkscan8	zinc finger with KRAB and SCAN domains 8 [Source:RGD Symbol;Acc:1308983]	protein_coding	30	0.149884	1000	5.55369
ENSRNOG00000054344	Ier2	immediate early response 2 [Source:RGD Symbol;Acc:1359581]	pseudogene	5	0.149499	44	1.4551
ENSRNOG00000004464	Sel1l	SEL1L adaptor subunit of ERAD E3 ubiquitin ligase [Source:RGD Symbol;Acc:620147]	protein_coding	22	0.14921	2401	18.4388
ENSRNOG00000060310	LOC688815	similar to prohibitin [Source:RGD Symbol;Acc:1584151]	pseudogene	3	0.149071	18	1.09481
ENSRNOG00000021573	Dpy19l3	dpy-19 like C-mannosyltransferase 3 [Source:RGD Symbol;Acc:1308334]	protein_coding	26	0.148747	925	5.94618
ENSRNOG00000007605	AABR07052430.1		protein_coding	3	0.148642	77	5.15894
ENSRNOG00000046517	AC099108.1		protein_coding	2	0.148514	0	0
ENSRNOG00000060570	AABR07061187.1		snRNA	1	0.148514	7	2.48515
ENSRNOG00000053078	Rnu11	U11 small nuclear RNA [Source:MGI Symbol;Acc:MGI:2148804]	snRNA	1	0.148514	6	1.84235
ENSRNOG00000061080	AABR07059168.2	lysine methyltransferase 2C [Source:NCBI gene;Acc:502710]	protein_coding	36	0.148374	1781	8.74991
ENSRNOG00000011101	Twist1	twist family bHLH transcription factor 1 [Source:RGD Symbol;Acc:621455]	protein_coding	6	0.148051	88	2.6657
ENSRNOG00000015621	Nsd3	nuclear receptor binding SET domain protein 3 [Source:RGD Symbol;Acc:1308980]	protein_coding	17	0.147937	1271	12.97
ENSRNOG00000011627	Zfr	zinc finger RNA binding protein [Source:RGD Symbol;Acc:1311890]	protein_coding	17	0.147619	2220	27.1885
ENSRNOG00000003951	Psmc1	proteasome 26S subunit, ATPase 1 [Source:RGD Symbol;Acc:621097]	protein_coding	6	0.147222	1468	44.5001
ENSRNOG00000057284	Cenpb	centromere protein B [Source:RGD Symbol;Acc:1304794]	protein_coding	7	0.146402	215	5.14154
ENSRNOG00000051858	AC120727.1	60S ribosomal protein L9-like [Source:NCBI gene;Acc:103690796]	protein_coding	2	0.146302	388	31.2914
ENSRNOG00000061185	Hist2h3c2	histone cluster 2 H3 family member C2 [Source:RGD Symbol;Acc:1306445]	protein_coding	2	0.145262	0	0
ENSRNOG00000028984	RGD1563307	similar to Set beta isoform [Source:RGD Symbol;Acc:1563307]	protein_coding	3	0.144536	4	0.190521
ENSRNOG00000055683	AC098125.3		pseudogene	6	0.144501	11	0.31927
ENSRNOG00000031680	RGD1564548	similar to H3 histone, family 3B [Source:RGD Symbol;Acc:1564548]	protein_coding	2	0.14381	0	0
ENSRNOG00000003686	Tbl1x	transducin (beta)-like 1 X-linked [Source:RGD Symbol;Acc:1563868]	protein_coding	17	0.143769	2460	23.1687
ENSRNOG00000000579	Marcks	myristoylated alanine rich protein kinase C substrate [Source:RGD Symbol;Acc:3028]	protein_coding	14	0.143081	6309	73.8379
ENSRNOG00000009113	Marcksl1	MARCKS-like 1 [Source:RGD Symbol;Acc:621197]	protein_coding	5	0.142731	149	4.799
ENSRNOG00000000557	Sar1a	secretion associated, Ras related GTPase 1A [Source:RGD Symbol;Acc:1359540]	protein_coding	7	0.142497	2487	49.2274
ENSRNOG00000028747	AABR07073039.1	ribosomal protein L22-like [Source:NCBI gene;Acc:100360057]	pseudogene	2	0.142297	387	49.0125
ENSRNOG00000062113	AABR07050545.2		processed_pseudogene	1	0.141297	0	0
ENSRNOG00000005417	Zhx2	zinc fingers and homeoboxes 2 [Source:RGD Symbol;Acc:727926]	protein_coding	9	0.140944	879	15.0664
ENSRNOG00000019164	Uba1	ubiquitin-like modifier activating enzyme 1 [Source:RGD Symbol;Acc:1359327]	protein_coding	12	0.140721	2712	36.8423
ENSRNOG00000053362	Gabarapl1	GABA type A receptor associated protein like 1 [Source:RGD Symbol;Acc:1596143]	protein_coding	6	0.140581	3144	91.2537
ENSRNOG00000051063	AABR07044940.1		protein_coding	2	0.140134	3	0.345678
ENSRNOG00000015914	U2af2	U2 small nuclear RNA auxiliary factor 2 [Source:RGD Symbol;Acc:1310690]	protein_coding	6	0.138746	106	3.02773
ENSRNOG00000039717	Ipo11	importin 11 [Source:MGI Symbol;Acc:MGI:2442377]	protein_coding	10	0.138512	217	3.62284
ENSRNOG00000005424	Odc1	ornithine decarboxylase 1 [Source:RGD Symbol;Acc:3227]	protein_coding	12	0.138332	1629	35.9233
ENSRNOG00000014635	Clta	clathrin, light chain A [Source:RGD Symbol;Acc:70919]	protein_coding	4	0.137148	954	43.167
ENSRNOG00000010523	Naa20	N(alpha)-acetyltransferase 20, NatB catalytic subunit [Source:RGD Symbol;Acc:1307713]	protein_coding	4	0.137143	149	5.55714
ENSRNOG00000009754	Nampt	nicotinamide phosphoribosyltransferase [Source:RGD Symbol;Acc:631365]	protein_coding	8	0.137023	475	9.07318
ENSRNOG00000002818	Eftud2	elongation factor Tu GTP binding domain containing 2 [Source:RGD Symbol;Acc:1560116]	protein_coding	6	0.135668	1218	27.3046
ENSRNOG00000005397	Maea	macrophage erythroblast attacher [Source:RGD Symbol;Acc:1309877]	protein_coding	7	0.135511	763	17.3519
ENSRNOG00000021395	LOC100363452	ribosomal protein S8-like [Source:RGD Symbol;Acc:2322993]	protein_coding	2	0.134812	533	40.0522
ENSRNOG00000055028	Setd1a	SET domain containing 1A, histone lysine methyltransferase [Source:RGD Symbol;Acc:1311624]	protein_coding	19	0.13346	678	5.46855
ENSRNOG00000019273	Capn7	calpain 7 [Source:RGD Symbol;Acc:1304855]	protein_coding	11	0.133011	920	12.7222
ENSRNOG00000017783	Sfrp1	secreted frizzled-related protein 1 [Source:RGD Symbol;Acc:621074]	protein_coding	12	0.132997	3215	40.4225
ENSRNOG00000011887	RGD1307929	similar to CG14967-PA [Source:RGD Symbol;Acc:1307929]	protein_coding	21	0.13194	3291	23.0973
ENSRNOG00000055241	AABR07053500.1		pseudogene	2	0.131504	0	0
ENSRNOG00000017558	Tubb2a	tubulin, beta 2A class IIa [Source:RGD Symbol;Acc:1588452]	protein_coding	5	0.131246	549	17.2386
ENSRNOG00000001436	Ywhag	tyrosine 3-monooxygenase/tryptophan 5-monooxygenase activation protein, gamma [Source:RGD Symbol;Acc:62002]	protein_coding	10	0.130729	990	14.8461
ENSRNOG00000004516	Itgbl1	integrin subunit beta like 1 [Source:RGD Symbol;Acc:1560635]	protein_coding	7	0.129947	1440	30.7863
ENSRNOG00000021024	Pi4kb	phosphatidylinositol 4-kinase beta [Source:RGD Symbol;Acc:621214]	protein_coding	10	0.128299	595	9.2276
ENSRNOG00000004398	Pkhd1l1	PKHD1 like 1 [Source:RGD Symbol;Acc:1310406]	protein_coding	37	0.127921	339	1.30212
ENSRNOG00000009378	Rpl4	ribosomal protein L4 [Source:RGD Symbol;Acc:619824]	protein_coding	4	0.127842	12276	433.144
ENSRNOG00000002139	RGD1311575	hypothetical LOC289568 [Source:RGD Symbol;Acc:1311575]	protein_coding	20	0.127689	573	4.13548
ENSRNOG00000014399	Aamp	angio-associated, migratory cell protein [Source:RGD Symbol;Acc:1306281]	protein_coding	7	0.127247	774	18.0588
ENSRNOG00000046740	LOC688672	similar to eukaryotic translation initiation factor 4A, isoform 1 [Source:RGD Symbol;Acc:1586428]	pseudogene	4	0.127058	18	0.719825
ENSRNOG00000019934	Paip2	poly(A) binding protein interacting protein 2 [Source:RGD Symbol;Acc:1359176]	protein_coding	4	0.126862	966	34.813
ENSRNOG00000019940	Ssr2	signal sequence receptor subunit 2 [Source:RGD Symbol;Acc:1308365]	protein_coding	4	0.126575	280	13.732
ENSRNOG00000033451	AABR07042892.1		protein_coding	2	0.126169	5	0.532405
ENSRNOG00000062225	AABR07002792.2		processed_pseudogene	1	0.125825	15	4.60212
ENSRNOG00000032585	AABR07048992.1		protein_coding	6	0.125447	1137	26.552
ENSRNOG00000052674	U2	U2 spliceosomal RNA [Source:RFAM;Acc:RF00004]	snRNA	1	0.125032	0	0
ENSRNOG00000017447	Eif2s2	eukaryotic translation initiation factor 2 subunit beta [Source:RGD Symbol;Acc:735192]	protein_coding	4	0.124901	972	33.15
ENSRNOG00000051286	LOC100911516	coiled-coil-helix-coiled-coil-helix domain-containing protein 2, mitochondrial-like [Source:RGD Symbol;Acc:6492335]	protein_coding	3	0.124546	75	7.90414
ENSRNOG00000030704	AC094053.1		pseudogene	14	0.124438	616	6.30175
ENSRNOG00000032204	Uqcrb	ubiquinol-cytochrome c reductase binding protein [Source:RGD Symbol;Acc:1311971]	protein_coding	2	0.124433	213	21.8619
ENSRNOG00000000713	AABR07033045.1		processed_pseudogene	2	0.12438	9	0.940164
ENSRNOG00000019823	Romo1	reactive oxygen species modulator 1 [Source:RGD Symbol;Acc:1587111]	protein_coding	1	0.12438	168	34.2172
ENSRNOG00000055082	Maz	MYC associated zinc finger protein [Source:RGD Symbol;Acc:1594632]	protein_coding	4	0.124242	61	2.0785
ENSRNOG00000001269	Ppp1cc	protein phosphatase 1 catalytic subunit gamma [Source:RGD Symbol;Acc:3377]	protein_coding	7	0.124182	859	18.7414
ENSRNOG00000007323	Ric8b	RIC8 guanine nucleotide exchange factor B [Source:RGD Symbol;Acc:631419]	protein_coding	6	0.124144	106	2.82758
ENSRNOG00000060851	AC105662.3		pseudogene	2	0.123608	6	0.605249
ENSRNOG00000028505	Rps18	ribosomal protein S18 [Source:RGD Symbol;Acc:3595]	protein_coding	4	0.123539	3461	308.808
ENSRNOG00000011606	AABR07061825.1		protein_coding	4	0.123514	59	2.38424
ENSRNOG00000048760	AABR07047219.1		pseudogene	2	0.123479	9	0.90622
ENSRNOG00000009888	Timm8b	translocase of inner mitochondrial membrane 8 homolog B [Source:RGD Symbol;Acc:619840]	protein_coding	2	0.123099	1216	122.646
ENSRNOG00000034066	Hspa8	heat shock protein family A (Hsp70) member 8 [Source:RGD Symbol;Acc:621725]	protein_coding	6	0.123037	4367	110.165
ENSRNOG00000019091	Wtap	WT1 associated protein [Source:RGD Symbol;Acc:1563824]	protein_coding	7	0.122793	552	15.3979
ENSRNOG00000011020	Eif3l	eukaryotic translation initiation factor 3, subunit L [Source:RGD Symbol;Acc:1308230]	protein_coding	4	0.122585	1117	38.2805
ENSRNOG00000061528	U2	U2 spliceosomal RNA [Source:RFAM;Acc:RF00004]	snRNA	1	0.122531	0	0
ENSRNOG00000011739	Dennd4a	DENN domain containing 4A [Source:RGD Symbol;Acc:1562639]	protein_coding	24	0.122382	1962	11.3425
ENSRNOG00000012174	AABR07024954.1		protein_coding	2	0.121347	0	0
ENSRNOG00000011134	Lama2	laminin subunit alpha 2 [Source:RGD Symbol;Acc:1308889]	protein_coding	26	0.12077	11532	60.2736
ENSRNOG00000055760	AABR07010649.1	eukaryotic translation initiation factor 3, subunit I, pseudo 1 [Source:NCBI gene;Acc:499619]	pseudogene	3	0.120373	212	10.4799
ENSRNOG00000020726	Sipa1	signal-induced proliferation-associated 1 [Source:RGD Symbol;Acc:1303184]	protein_coding	10	0.119544	808	11.4506
ENSRNOG00000004438	Cntn1	contactin 1 [Source:RGD Symbol;Acc:621300]	protein_coding	11	0.119313	129	1.96358
ENSRNOG00000001964	Cd47	Cd47 molecule [Source:RGD Symbol;Acc:2308]	protein_coding	6	0.119281	1819	46.4921
ENSRNOG00000006557	Cyfip2	cytoplasmic FMR1 interacting protein 2 [Source:RGD Symbol;Acc:1305048]	protein_coding	17	0.118966	751	5.88211
ENSRNOG00000056585	Fscn1	fascin actin-bundling protein 1 [Source:MGI Symbol;Acc:MGI:1352745]	protein_coding	4	0.118761	186	6.1198
ENSRNOG00000006756	Maged1	MAGE family member D1 [Source:RGD Symbol;Acc:70898]	protein_coding	7	0.117199	3011	52.4472
ENSRNOG00000048585	AABR07018244.1		protein_coding	2	0.117064	8	0.867379
ENSRNOG00000000547	Tspyl4	TSPY-like 4 [Source:RGD Symbol;Acc:1306653]	protein_coding	6	0.116339	180	4.42481
ENSRNOG00000048753	AABR07008350.1		protein_coding	2	0.116192	0	0
ENSRNOG00000017829	Ssu72	SSU72 homolog, RNA polymerase II CTD phosphatase [Source:RGD Symbol;Acc:1307854]	protein_coding	3	0.115034	529	24.895
ENSRNOG00000019374	Csk	C-terminal Src kinase [Source:RGD Symbol;Acc:1308800]	protein_coding	6	0.114868	65	1.48943
ENSRNOG00000013200	AC113771.1		processed_pseudogene	2	0.114651	10	1.08654
ENSRNOG00000023816	Aph1a	aph-1 homolog A, gamma secretase subunit [Source:RGD Symbol;Acc:1311546]	protein_coding	6	0.114306	130	3.09984
ENSRNOG00000002565	Taf1	TATA-box binding protein associated factor 1 [Source:RGD Symbol;Acc:1562050]	processed_transcript	15	0.114267	341	2.90809
ENSRNOG00000009689	Api5	apoptosis inhibitor 5 [Source:RGD Symbol;Acc:1309772]	protein_coding	10	0.114162	945	12.8419
ENSRNOG00000031716	LOC100910978	extracellular matrix protein 2-like [Source:RGD Symbol;Acc:6495594]	protein_coding	8	0.114072	1180	21.6826
ENSRNOG00000060337	Exosc7	exosome component 7 [Source:RGD Symbol;Acc:1309758]	protein_coding	3	0.11402	90	4.22143
ENSRNOG00000049452	Nebl	nebulette [Source:RGD Symbol;Acc:1308315]	protein_coding	9	0.113879	175	6.23969
ENSRNOG00000057979	AABR07011700.1		protein_coding	3	0.113719	0	0
ENSRNOG00000005678	Lamb1	laminin subunit beta 1 [Source:RGD Symbol;Acc:1306311]	protein_coding	15	0.113589	3247	28.1496
ENSRNOG00000054818	LOC100910557	transmembrane protein 115-like [Source:RGD Symbol;Acc:6497991]	protein_coding	3	0.113396	0	0
ENSRNOG00000007390	Nfkbia	NFKB inhibitor alpha [Source:RGD Symbol;Acc:3171]	protein_coding	4	0.113301	190	5.93118
ENSRNOG00000010966	Itgb1	integrin subunit beta 1 [Source:RGD Symbol;Acc:2927]	protein_coding	10	0.113269	2681	35.8621
ENSRNOG00000015182	Ppp2cb	protein phosphatase 2 catalytic subunit beta [Source:RGD Symbol;Acc:3381]	protein_coding	4	0.113002	1838	56.727
ENSRNOG00000055319	Mrfap1	Morf4 family associated protein 1 [Source:RGD Symbol;Acc:628631]	protein_coding	4	0.112951	3378	106.38
ENSRNOG00000010892	Ythdf2	YTH N(6)-methyladenosine RNA binding protein 2 [Source:RGD Symbol;Acc:1311321]	protein_coding	6	0.112657	492	11.5244
ENSRNOG00000047737	Rpl7a	ribosomal protein L7a [Source:RGD Symbol;Acc:1307586]	protein_coding	3	0.112223	342	20.9603
ENSRNOG00000034071	Chmp4bl1	chromatin modifying protein 4B-like 1 [Source:RGD Symbol;Acc:1583604]	protein_coding	3	0.111799	104	4.88708
ENSRNOG00000007029	Dnaja1	DnaJ heat shock protein family (Hsp40) member A1 [Source:RGD Symbol;Acc:620942]	protein_coding	4	0.111247	1918	58.2875
ENSRNOG00000012157	Snrnp200	small nuclear ribonucleoprotein U5 subunit 200 [Source:RGD Symbol;Acc:1561120]	protein_coding	17	0.111015	3151	22.6655
ENSRNOG00000011077	Tjp1	tight junction protein 1 [Source:RGD Symbol;Acc:1306305]	protein_coding	17	0.110577	10908	87.4996
ENSRNOG00000022781	Ccser2	coiled-coil serine-rich protein 2 [Source:RGD Symbol;Acc:1304626]	protein_coding	8	0.110192	3615	60.1282
ENSRNOG00000021260	Prnd	prion like protein doppel [Source:RGD Symbol;Acc:1306618]	protein_coding	2	0.110067	0	0
ENSRNOG00000019357	Tax1bp3	Tax1 binding protein 3 [Source:RGD Symbol;Acc:1308924]	protein_coding	4	0.109541	1135	45.2116
ENSRNOG00000005869	AABR07017110.1		processed_pseudogene	3	0.109389	167	8.98134
ENSRNOG00000011015	Hivep2	human immunodeficiency virus type I enhancer binding protein 2 [Source:RGD Symbol;Acc:61988]	protein_coding	23	0.109365	2191	11.4116
ENSRNOG00000024501	Rgs3	regulator of G-protein signaling 3 [Source:RGD Symbol;Acc:3566]	protein_coding	9	0.109344	143	1.76913
ENSRNOG00000021752	Foxq1	forkhead box Q1 [Source:RGD Symbol;Acc:621572]	pseudogene	4	0.109114	0	0
ENSRNOG00000000841	Ddx39b	DExD-box helicase 39B [Source:RGD Symbol;Acc:70923]	protein_coding	5	0.108685	2938	90.0329
ENSRNOG00000010999	Cep295	centrosomal protein 295 [Source:RGD Symbol;Acc:1311723]	protein_coding	19	0.108565	124	0.790386
ENSRNOG00000054891	Cnot6	CCR4-NOT transcription complex, subunit 6 [Source:RGD Symbol;Acc:1310783]	protein_coding	5	0.108465	953	23.6963
ENSRNOG00000058646	Zfp36l1	zinc finger protein 36, C3H type-like 1 [Source:RGD Symbol;Acc:62009]	protein_coding	7	0.107894	3400	60.9949
ENSRNOG00000003174	Tapt1	transmembrane anterior posterior transformation 1 [Source:RGD Symbol;Acc:1309656]	protein_coding	9	0.107494	1130	14.7475
ENSRNOG00000009740	Slco1c1	solute carrier organic anion transporter family, member 1c1 [Source:RGD Symbol;Acc:628660]	protein_coding	7	0.107214	21	0.368793
ENSRNOG00000057774	RGD1560212	similar to DNA segment, Chr 18, Wayne State University 98, expressed [Source:RGD Symbol;Acc:1560212]	protein_coding	4	0.107085	177	5.1878
ENSRNOG00000019476	Agap1	ArfGAP with GTPase domain, ankyrin repeat and PH domain 1 [Source:RGD Symbol;Acc:1309244]	protein_coding	11	0.106996	864	11.3389
ENSRNOG00000027860	Ggnbp2	gametogenetin binding protein 2 [Source:RGD Symbol;Acc:1302978]	protein_coding	7	0.106589	1169	20.6635
ENSRNOG00000056314	AABR07056330.1		lincRNA	3	0.106274	7	0.30407
ENSRNOG00000007869	Wscd1	WSC domain containing 1 [Source:RGD Symbol;Acc:1308212]	protein_coding	7	0.106042	0	0
ENSRNOG00000059676	SNORD115	Small nucleolar RNA SNORD115 [Source:RFAM;Acc:RF00105]	snoRNA	1	0.105883	1	0.363913
ENSRNOG00000061307	SNORD115	Small nucleolar RNA SNORD115 [Source:RFAM;Acc:RF00105]	snoRNA	1	0.105883	1	0.426657
ENSRNOG00000000236	Zfp207	zinc finger protein 207 [Source:RGD Symbol;Acc:1308121]	protein_coding	5	0.105845	1221	34.1337
ENSRNOG00000052909	AABR07036746.1		protein_coding	2	0.105662	265	21.3969
ENSRNOG00000013520	Mat2a	methionine adenosyltransferase 2A [Source:RGD Symbol;Acc:619985]	protein_coding	8	0.105196	1443	24.4347
ENSRNOG00000029594	AABR07064000.1		protein_coding	2	0.10511	35	2.97489
ENSRNOG00000020615	Nap1l4	nucleosome assembly protein 1-like 4 [Source:RGD Symbol;Acc:1305391]	protein_coding	6	0.105033	1680	38.6213
ENSRNOG00000010945	Ywhab	tyrosine 3-monooxygenase/tryptophan 5-monooxygenase activation protein, beta [Source:RGD Symbol;Acc:61998]	protein_coding	7	0.10494	6661	121.123
ENSRNOG00000005884	Emc7	ER membrane protein complex subunit 7 [Source:RGD Symbol;Acc:1305045]	protein_coding	3	0.10465	1095	46.9418
ENSRNOG00000016940	Ppp2r2d	protein phosphatase 2, regulatory subunit B, delta [Source:RGD Symbol;Acc:708356]	protein_coding	4	0.103406	122	3.47483
ENSRNOG00000048656	AABR07007853.1		protein_coding	2	0.103007	39	3.85596
ENSRNOG00000045990	LOC100912261	protein FAM64A-like [Source:RGD Symbol;Acc:6488061]	pseudogene	2	0.102816	0	0
ENSRNOG00000017674	Ctcf	CCCTC-binding factor [Source:RGD Symbol;Acc:621344]	protein_coding	9	0.102783	787	9.82868
ENSRNOG00000050490	Mir3064	microRNA 3064 [Source:RGD Symbol;Acc:9685093]	miRNA	1	0.102475	5	2.99323
ENSRNOG00000019799	Pcdhgc3	protocadherin gamma subfamily C, 3 [Source:MGI Symbol;Acc:MGI:1935201]	protein_coding	7	0.102384	2489	43.4423
ENSRNOG00000018487	Slc3a2	solute carrier family 3 member 2 [Source:RGD Symbol;Acc:3073]	protein_coding	5	0.102118	1346	32.0632
ENSRNOG00000009430	Gnl2	G protein nucleolar 2 [Source:RGD Symbol;Acc:1305006]	protein_coding	10	0.101697	352	4.1636
ENSRNOG00000004208	Crim1	cysteine rich transmembrane BMP regulator 1 [Source:RGD Symbol;Acc:1308710]	protein_coding	10	0.100481	331	3.9642
ENSRNOG00000048795	Top2b	DNA topoisomerase II beta [Source:RGD Symbol;Acc:1586156]	processed_transcript	11	0.100278	973	38.1488
ENSRNOG00000010964	Akap13	A-kinase anchoring protein 13 [Source:RGD Symbol;Acc:727893]	protein_coding	28	0.099936	3314	13.2587
ENSRNOG00000018371	Tubb6	tubulin, beta 6 class V [Source:RGD Symbol;Acc:1305887]	protein_coding	4	0.099902	911	25.4391
ENSRNOG00000000943	AC136867.1		processed_pseudogene	1	0.099505	0	0
ENSRNOG00000000021	AABR07061902.1		pseudogene	3	0.099339	46	1.83708
ENSRNOG00000034130	LOC108349189	high mobility group protein B1 pseudogene [Source:RGD Symbol;Acc:11468204]	protein_coding	2	0.099194	142	10.7703
ENSRNOG00000020763	Snrnp70	small nuclear ribonucleoprotein U1 subunit 70 [Source:RGD Symbol;Acc:1307120]	protein_coding	4	0.098853	671	19.6891
ENSRNOG00000032463	Rap1a	RAP1A, member of RAS oncogene family [Source:RGD Symbol;Acc:1359694]	protein_coding	6	0.098697	3354	70.1087
ENSRNOG00000000466	Hsd17b8	hydroxysteroid (17-beta) dehydrogenase 8 [Source:RGD Symbol;Acc:1303158]	protein_coding	3	0.098416	44	2.4099
ENSRNOG00000025179	AABR07045322.1	ribosomal protein L13a-like [Source:NCBI gene;Acc:100361061]	pseudogene	2	0.097873	640	51.3232
ENSRNOG00000005124	Plekhh2	pleckstrin homology, MyTH4 and FERM domain containing H2 [Source:RGD Symbol;Acc:1304935]	protein_coding	11	0.097632	2047	20.705
ENSRNOG00000049099	AABR07017250.1		protein_coding	2	0.09753	122	11.7611
ENSRNOG00000047246	Chtf8	chromosome transmission fidelity factor 8 [Source:RGD Symbol;Acc:1306894]	protein_coding	7	0.09745	1075	17.2396
ENSRNOG00000014637	Atxn10	ataxin 10 [Source:RGD Symbol;Acc:621813]	protein_coding	5	0.097447	713	18.9799
ENSRNOG00000012287	Slc35e1	solute carrier family 35, member E1 [Source:RGD Symbol;Acc:1561342]	protein_coding	3	0.097078	0	0
ENSRNOG00000010744	Nrp1	neuropilin 1 [Source:RGD Symbol;Acc:621588]	protein_coding	12	0.09683	349	3.09531
ENSRNOG00000000527	Mtch1	mitochondrial carrier 1 [Source:RGD Symbol;Acc:1309262]	protein_coding	4	0.096743	2305	64.044
ENSRNOG00000001205	Agpat3	1-acylglycerol-3-phosphate O-acyltransferase 3 [Source:RGD Symbol;Acc:1305787]	protein_coding	13	0.096471	403	3.28349
ENSRNOG00000008747	Plekha5	pleckstrin homology domain containing A5 [Source:RGD Symbol;Acc:621175]	protein_coding	10	0.096052	286	2.9257
ENSRNOG00000026293	Jun	Jun proto-oncogene, AP-1 transcription factor subunit [Source:RGD Symbol;Acc:2943]	protein_coding	7	0.095478	1148	18.1861
ENSRNOG00000011155	AABR07072207.1		pseudogene	2	0.095068	496	38.6148
ENSRNOG00000018232	Srf	serum response factor [Source:RGD Symbol;Acc:1559787]	protein_coding	9	0.094986	399	4.74869
ENSRNOG00000020288	Slc25a20	solute carrier family 25 member 20 [Source:RGD Symbol;Acc:621443]	protein_coding	4	0.094675	358	9.86463
ENSRNOG00000004820	Sar1b	secretion associated, Ras related GTPase 1B [Source:RGD Symbol;Acc:1305590]	protein_coding	3	0.094466	440	17.034
ENSRNOG00000052664	LOC100910717	tankyrase-2-like [Source:RGD Symbol;Acc:6496922]	protein_coding	13	0.094306	0	0
ENSRNOG00000055096	AABR07002768.1		pseudogene	7	0.094117	109	1.70242
ENSRNOG00000000248	Srsf2	serine and arginine rich splicing factor 2 [Source:RGD Symbol;Acc:1359422]	protein_coding	4	0.093904	1542	39.6875
ENSRNOG00000030118	Msn	moesin [Source:RGD Symbol;Acc:621260]	protein_coding	8	0.093614	3338	44.8998
ENSRNOG00000004090	LOC100361025	protein arginine methyltransferase 1-like [Source:RGD Symbol;Acc:2320935]	protein_coding	3	0.093456	142	5.75518
ENSRNOG00000039807	Fam193b	family with sequence similarity 193, member B [Source:RGD Symbol;Acc:1562335]	protein_coding	7	0.093441	322	5.5073
ENSRNOG00000001287	Gper1	G protein-coupled estrogen receptor 1 [Source:RGD Symbol;Acc:619845]	protein_coding	3	0.093358	114	4.3407
ENSRNOG00000002886	Myh10	myosin heavy chain 10 [Source:RGD Symbol;Acc:71000]	protein_coding	16	0.093349	2237	14.3477
ENSRNOG00000014160	Tcp1	t-complex 1 [Source:RGD Symbol;Acc:3832]	protein_coding	4	0.092927	775	20.7147
ENSRNOG00000062283	AABR07003492.2		processed_pseudogene	3	0.092891	28	1.06545
ENSRNOG00000059138	AC121204.3		protein_coding	1	0.092871	2	0.160414
ENSRNOG00000011148	Ssr3	signal sequence receptor subunit 3 [Source:RGD Symbol;Acc:621630]	protein_coding	6	0.092767	1311	25.0977
ENSRNOG00000022882	AABR07015294.1	40S ribosomal protein SA-like [Source:NCBI gene;Acc:100912502]	pseudogene	2	0.09272	24	1.28896
ENSRNOG00000015033	Mxd4	Max dimerization protein 4 [Source:RGD Symbol;Acc:1305093]	protein_coding	8	0.092634	1109	14.526
ENSRNOG00000020853	Scap	SREBF chaperone [Source:RGD Symbol;Acc:1309378]	protein_coding	9	0.092248	1187	13.6112
ENSRNOG00000056964	AABR07033570.2	sorting nexin-1-like [Source:NCBI gene;Acc:102549158]	processed_pseudogene	4	0.092136	61	1.84803
ENSRNOG00000024213	Golim4	golgi integral membrane protein 4 [Source:RGD Symbol;Acc:1310948]	protein_coding	6	0.092104	957	21.5477
ENSRNOG00000017359	Itm2c	integral membrane protein 2C [Source:RGD Symbol;Acc:1309503]	protein_coding	4	0.091994	4684	119.319
ENSRNOG00000019798	Stub1	STIP1 homology and U-box containing protein 1 [Source:RGD Symbol;Acc:1306167]	protein_coding	3	0.091921	585	22.0085
ENSRNOG00000002021	Son	Son DNA binding protein [Source:RGD Symbol;Acc:1309013]	protein_coding	18	0.091789	5576	32.3552
ENSRNOG00000000397	Ccar1	cell division cycle and apoptosis regulator 1 [Source:RGD Symbol;Acc:1560358]	protein_coding	10	0.091747	768	8.46004
ENSRNOG00000038766	LOC103694328	alanine and glycine-rich protein-like [Source:RGD Symbol;Acc:9319286]	protein_coding	5	0.091639	937	19.165
ENSRNOG00000009990	Zranb2	zinc finger RANBP2-type containing 2 [Source:RGD Symbol;Acc:61854]	protein_coding	6	0.091356	527	9.90859
ENSRNOG00000054257	Adam10	ADAM metallopeptidase domain 10 [Source:RGD Symbol;Acc:2032]	protein_coding	8	0.091171	2393	30.9409
ENSRNOG00000013852	Med20	mediator complex subunit 20 [Source:RGD Symbol;Acc:1306415]	protein_coding	4	0.09117	412	10.2762
ENSRNOG00000047459	Hist1h1e	histone cluster 1 H1 family member e [Source:RGD Symbol;Acc:2776]	protein_coding	2	0.090459	795	58.8932
ENSRNOG00000033146	LOC103690015	40S ribosomal protein S19-like [Source:RGD Symbol;Acc:9313957]	protein_coding	1	0.09034	96	10.223
ENSRNOG00000007520	Zcchc3	zinc finger CCHC-type containing 3 [Source:RGD Symbol;Acc:1585203]	protein_coding	3	0.089331	20	0.777834
ENSRNOG00000014999	Tnpo1	transportin 1 [Source:RGD Symbol;Acc:1308372]	protein_coding	17	0.088824	4699	27.7653
ENSRNOG00000028556	Usp30	ubiquitin specific peptidase 30 [Source:RGD Symbol;Acc:1307949]	protein_coding	7	0.08808	139	2.35838
ENSRNOG00000060599	Gabrb3	gamma-aminobutyric acid type A receptor beta 3 subunit [Source:RGD Symbol;Acc:2651]	protein_coding	4	0.08793	4	0.104461
ENSRNOG00000018387	Wdr7	WD repeat domain 7 [Source:RGD Symbol;Acc:619836]	protein_coding	14	0.087816	1067	7.39824
ENSRNOG00000051180	Chchd2	coiled-coil-helix-coiled-coil-helix domain containing 2 [Source:RGD Symbol;Acc:1309819]	protein_coding	2	0.087413	58	4.10119
ENSRNOG00000032944	AABR07049320.1		protein_coding	1	0.087285	42	4.40675
ENSRNOG00000030107	AABR07049329.1		protein_coding	1	0.086714	54	5.68169
ENSRNOG00000045561	Uqcc3	ubiquinol-cytochrome c reductase complex assembly factor 3 [Source:RGD Symbol;Acc:1597344]	protein_coding	2	0.086526	139	9.83908
ENSRNOG00000059500	Cdkn1c	cyclin-dependent kinase inhibitor 1C [Source:RGD Symbol;Acc:727892]	protein_coding	4	0.086479	399	10.4299
ENSRNOG00000010488	Zmiz1	zinc finger, MIZ-type containing 1 [Source:RGD Symbol;Acc:1311620]	protein_coding	15	0.086299	4975	32.3764
ENSRNOG00000034093	AABR07011951.1		protein_coding	4	0.085764	1088	25.9942
ENSRNOG00000026124	Id3	inhibitor of DNA binding 3, HLH protein [Source:RGD Symbol;Acc:2860]	protein_coding	2	0.085553	140	6.7848
ENSRNOG00000030213	Vps13c	vacuolar protein sorting 13 homolog C [Source:RGD Symbol;Acc:1560364]	protein_coding	22	0.085426	1280	5.58085
ENSRNOG00000049442	AABR07026317.1		processed_pseudogene	1	0.08529	328	76.2711
ENSRNOG00000029052	LOC108352861	40S ribosomal protein S28 pseudogene [Source:RGD Symbol;Acc:11455995]	processed_pseudogene	1	0.08529	38	8.78228
ENSRNOG00000042728	Fbrs	fibrosin [Source:MGI Symbol;Acc:MGI:104648]	protein_coding	3	0.085229	115	3.98966
ENSRNOG00000008611	AABR07060593.1		pseudogene	2	0.084926	14	0.931573
ENSRNOG00000001662	Dyrk1a	dual specificity tyrosine phosphorylation regulated kinase 1A [Source:RGD Symbol;Acc:2528]	protein_coding	6	0.084147	799	13.7724
ENSRNOG00000046944	AC110709.1		processed_pseudogene	1	0.083544	151	18.4445
ENSRNOG00000023972	Col4a2	collagen type IV alpha 2 chain [Source:RGD Symbol;Acc:1308085]	protein_coding	10	0.082565	565	5.58849
ENSRNOG00000015232	Pip5k1b	phosphatidylinositol-4-phosphate 5-kinase type 1 beta [Source:RGD Symbol;Acc:1310914]	protein_coding	6	0.082278	0	0
ENSRNOG00000008193	Cr1l	complement C3b/C4b receptor 1 like [Source:RGD Symbol;Acc:2399]	protein_coding	4	0.082085	1324	32.9033
ENSRNOG00000006048	Ezh2	enhancer of zeste 2 polycomb repressive complex 2 subunit [Source:RGD Symbol;Acc:1595860]	protein_coding	6	0.081627	141	2.46732
ENSRNOG00000002041	Boc	BOC cell adhesion associated, oncogene regulated [Source:RGD Symbol;Acc:1304550]	protein_coding	8	0.0816	212	2.49701
ENSRNOG00000030345	LOC100362684	ribosomal protein S20-like [Source:RGD Symbol;Acc:2324274]	protein_coding	1	0.081262	79	10.6516
ENSRNOG00000027739	Cndp1	carnosine dipeptidase 1 [Source:RGD Symbol;Acc:1359493]	protein_coding	6	0.081153	333	5.56281
ENSRNOG00000058263	AABR07027753.4	histone cluster 1, H2bl [Source:NCBI gene;Acc:64647]	pseudogene	1	0.080938	0	0
ENSRNOG00000014187	Igf1r	insulin-like growth factor 1 receptor [Source:RGD Symbol;Acc:2869]	protein_coding	8	0.080848	768	9.15098
ENSRNOG00000003897	Col1a1	collagen type I alpha 1 chain [Source:RGD Symbol;Acc:61817]	protein_coding	11	0.080765	9520	79.9793
ENSRNOG00000017489	Gse1	Gse1 coiled-coil protein [Source:RGD Symbol;Acc:1562686]	protein_coding	9	0.080698	366	4.03006
ENSRNOG00000008451	Fut8	fucosyltransferase 8 [Source:RGD Symbol;Acc:1303096]	protein_coding	6	0.080674	1068	18.4796
ENSRNOG00000020235	Hnrnpl	heterogeneous nuclear ribonucleoprotein L [Source:RGD Symbol;Acc:71059]	protein_coding	4	0.080605	859	19.2354
ENSRNOG00000054973	Snora65	small nucleolar RNA, H/ACA box 65 [Source:MGI Symbol;Acc:MGI:2148176]	snoRNA	1	0.080369	10	3.45843
ENSRNOG00000016266	Mphosph10	M-phase phosphoprotein 10 [Source:RGD Symbol;Acc:1307633]	protein_coding	4	0.080218	318	7.04518
ENSRNOG00000004284	Btg1	BTG anti-proliferation factor 1 [Source:RGD Symbol;Acc:2224]	protein_coding	3	0.080039	817	27.3234
ENSRNOG00000017158	Eif4g2	eukaryotic translation initiation factor 4, gamma 2 [Source:RGD Symbol;Acc:1305294]	protein_coding	9	0.079931	11447	112.304
ENSRNOG00000061058	LOC100364335	cold shock domain-containing protein E1-like [Source:RGD Symbol;Acc:2321223]	protein_coding	7	0.079913	3429	45.0029
ENSRNOG00000001849	Mapk1	mitogen activated protein kinase 1 [Source:RGD Symbol;Acc:70500]	protein_coding	3	0.07955	393	13.0491
ENSRNOG00000012138	Rbmxl1	RBMX like 1 [Source:RGD Symbol;Acc:1306751]	protein_coding	3	0.079392	285	9.26325
ENSRNOG00000000520	Srsf3	serine and arginine rich splicing factor 3 [Source:RGD Symbol;Acc:1309233]	protein_coding	6	0.078681	1564	26.685
ENSRNOG00000052561	U2	U2 spliceosomal RNA [Source:RFAM;Acc:RF00004]	snRNA	1	0.078556	0	0
ENSRNOG00000018126	Abca1	ATP binding cassette subfamily A member 1 [Source:RGD Symbol;Acc:631344]	protein_coding	19	0.078507	1291	6.10927
ENSRNOG00000004265	Dipk2b	divergent protein kinase domain 2B [Source:RGD Symbol;Acc:1559731]	protein_coding	3	0.078267	4	0.128959
ENSRNOG00000013717	Bmp6	bone morphogenetic protein 6 [Source:RGD Symbol;Acc:2214]	protein_coding	3	0.078112	495	15.9039
ENSRNOG00000001030	Tsc22d1	TSC22 domain family, member 1 [Source:RGD Symbol;Acc:3850]	protein_coding	8	0.077426	5215	135.558
ENSRNOG00000018886	Prxl2c	peroxiredoxin like 2C [Source:RGD Symbol;Acc:1589650]	protein_coding	2	0.077335	5	0.278625
ENSRNOG00000031387	Dazap1	DAZ associated protein 1 [Source:RGD Symbol;Acc:1305280]	protein_coding	3	0.077199	99	3.12784
ENSRNOG00000030442	AABR07027322.1	ribosomal protein L13a-like [Source:NCBI gene;Acc:100362583]	pseudogene	2	0.077193	419	33.4964
ENSRNOG00000000417	Numa1	nuclear mitotic apparatus protein 1 [Source:RGD Symbol;Acc:1308777]	protein_coding	14	0.076715	1527	9.78418
ENSRNOG00000054139	LOC100911132	glutamine--tRNA ligase-like [Source:RGD Symbol;Acc:6494601]	protein_coding	4	0.076522	0	0
ENSRNOG00000000593	Rev3l	REV3 like, DNA directed polymerase zeta catalytic subunit [Source:RGD Symbol;Acc:1307087]	protein_coding	19	0.076185	804	3.68096
ENSRNOG00000014270	Rer1	retention in endoplasmic reticulum sorting receptor 1 [Source:RGD Symbol;Acc:1306324]	protein_coding	3	0.076115	541	21.0703
ENSRNOG00000045568	Rbm14	RNA binding motif protein 14 [Source:RGD Symbol;Acc:620542]	protein_coding	6	0.075768	370	5.75762
ENSRNOG00000014476	Evl	Enah/Vasp-like [Source:RGD Symbol;Acc:621150]	protein_coding	3	0.075621	56	1.66737
ENSRNOG00000005850	Gdap1	ganglioside-induced differentiation-associated-protein 1 [Source:RGD Symbol;Acc:1309005]	protein_coding	7	0.075408	85	1.04698
ENSRNOG00000010303	Trim32	tripartite motif-containing 32 [Source:RGD Symbol;Acc:1305238]	protein_coding	6	0.075289	366	5.66059
ENSRNOG00000017496	Cnp	2',3'-cyclic nucleotide 3' phosphodiesterase [Source:RGD Symbol;Acc:2368]	protein_coding	4	0.075245	2803	59.5963
ENSRNOG00000013743	Sec61a1	Sec61 translocon alpha 1 subunit [Source:RGD Symbol;Acc:68321]	protein_coding	6	0.075219	1786	28.8249
ENSRNOG00000032454	AABR07047714.1		protein_coding	1	0.074815	0	0
ENSRNOG00000012422	Tnik	TRAF2 and NCK interacting kinase [Source:RGD Symbol;Acc:1561817]	protein_coding	8	0.074711	321	3.46469
ENSRNOG00000047734	Chst2	carbohydrate sulfotransferase 2 [Source:RGD Symbol;Acc:1306988]	protein_coding	3	0.074582	197	6.02764
ENSRNOG00000005920	AABR07054266.1		pseudogene	2	0.07443	101	6.5314
ENSRNOG00000007990	Adipor2	adiponectin receptor 2 [Source:RGD Symbol;Acc:1307891]	protein_coding	3	0.07437	192	6.46934
ENSRNOG00000009072	AABR07056013.1		processed_pseudogene	2	0.073981	0	0
ENSRNOG00000011827	LOC100360846	proteasome subunit beta type 6-like [Source:RGD Symbol;Acc:2321312]	protein_coding	2	0.073468	81	5.09771
ENSRNOG00000003679	Med13	mediator complex subunit 13 [Source:RGD Symbol;Acc:1304829]	protein_coding	12	0.073353	3114	21.6956
ENSRNOG00000007851	Psma3	proteasome subunit alpha 3 [Source:RGD Symbol;Acc:61844]	protein_coding	6	0.073303	517	7.88469
ENSRNOG00000023202	Usp15	ubiquitin specific peptidase 15 [Source:RGD Symbol;Acc:628795]	protein_coding	6	0.07317	338	5.14693
ENSRNOG00000006868	Ube2z	ubiquitin-conjugating enzyme E2Z [Source:RGD Symbol;Acc:1308347]	protein_coding	5	0.073165	154	2.6307
ENSRNOG00000007998	Ssb	small RNA binding exonuclease protection factor La [Source:RGD Symbol;Acc:620804]	protein_coding	3	0.072808	521	15.5373
ENSRNOG00000000924	Slc7a1	solute carrier family 7 member 1 [Source:RGD Symbol;Acc:3716]	protein_coding	11	0.072696	435	3.89736
ENSRNOG00000019465	Gnai3	G protein subunit alpha i3 [Source:RGD Symbol;Acc:2714]	protein_coding	6	0.072395	1731	26.3974
ENSRNOG00000005951	AABR07052085.1		processed_pseudogene	2	0.072367	0	0
ENSRNOG00000031364	Kif1c	kinesin family member 1C [Source:RGD Symbol;Acc:70928]	protein_coding	7	0.071871	1809	21.6574
ENSRNOG00000013516	Sf3b1	splicing factor 3b, subunit 1 [Source:RGD Symbol;Acc:620148]	protein_coding	8	0.071585	1513	14.9418
ENSRNOG00000025481	Dctn2	dynactin subunit 2 [Source:RGD Symbol;Acc:1303182]	protein_coding	3	0.071238	407	12.0574
ENSRNOG00000045649	Arrdc3	arrestin domain containing 3 [Source:RGD Symbol;Acc:1359478]	protein_coding	3	0.07116	564	16.4246
ENSRNOG00000004234	Mgat2	mannosyl (alpha-1,6-)-glycoprotein beta-1,2-N-acetylglucosaminyltransferase [Source:RGD Symbol;Acc:620098]	protein_coding	4	0.071086	151	2.96003
ENSRNOG00000015161	LOC688754	similar to Voltage-dependent anion-selective channel protein 1 (VDAC-1) (mVDAC1) (mVDAC5) (Outer mitochondrial membrane protein porin 1) (Plasmalemmal porin) [Source:RGD Symbol;Acc:1585254]	pseudogene	2	0.070404	100	5.75636
ENSRNOG00000050647	Hspa1b	heat shock protein family A (Hsp70) member 1B [Source:RGD Symbol;Acc:2840]	protein_coding	4	0.070253	175	3.47562
ENSRNOG00000053620	AABR07051069.1		protein_coding	3	0.070154	0	0
ENSRNOG00000053044	AABR07012775.1		protein_coding	1	0.069962	22	2.19619
ENSRNOG00000018840	Rnf40	ring finger protein 40 [Source:RGD Symbol;Acc:628638]	protein_coding	6	0.069458	86	1.22733
ENSRNOG00000025142	Mex3b	mex-3 RNA binding family member B [Source:RGD Symbol;Acc:1306790]	protein_coding	6	0.069389	35	0.491614
ENSRNOG00000011057	Mfn1	mitofusin 1 [Source:RGD Symbol;Acc:621460]	protein_coding	7	0.068877	902	10.4989
ENSRNOG00000030790	Ctnnd1	catenin delta 1 [Source:RGD Symbol;Acc:1305643]	protein_coding	8	0.068874	4512	42.5053
ENSRNOG00000007106	Sos1	SOS Ras/Rac guanine nucleotide exchange factor 1 [Source:RGD Symbol;Acc:1310949]	protein_coding	11	0.068822	646	4.77309
ENSRNOG00000005932	Megf9	multiple EGF-like-domains 9 [Source:RGD Symbol;Acc:1308330]	protein_coding	6	0.068754	1181	17.6908
ENSRNOG00000018824	Slc7a5	solute carrier family 7 member 5 [Source:RGD Symbol;Acc:620639]	protein_coding	6	0.068715	849	12.0122
ENSRNOG00000049900	Irf2bp2	interferon regulatory factor 2 binding protein 2 [Source:RGD Symbol;Acc:1589517]	protein_coding	3	0.06854	386	11.0037
ENSRNOG00000000664	Tpst2	tyrosylprotein sulfotransferase 2 [Source:RGD Symbol;Acc:1305331]	protein_coding	3	0.068466	32	0.879274
ENSRNOG00000023383	Ddx3x	DEAD-box helicase 3, X-linked [Source:RGD Symbol;Acc:1564771]	protein_coding	7	0.068146	1692	21.3159
ENSRNOG00000013469	Txndc5	thioredoxin domain containing 5 [Source:RGD Symbol;Acc:2323973]	protein_coding	4	0.067906	1219	22.7647
ENSRNOG00000056526	AABR07054262.1		pseudogene	3	0.067548	24	0.688679
ENSRNOG00000038735	AABR07064702.1		processed_pseudogene	1	0.067334	5	0.592023
ENSRNOG00000003866	Cxcr4	C-X-C motif chemokine receptor 4 [Source:RGD Symbol;Acc:620465]	protein_coding	3	0.067247	26	0.70402
ENSRNOG00000052587	LOC100909474	protein FAM43A-like [Source:RGD Symbol;Acc:6503176]	protein_coding	2	0.066958	327	11.9967
ENSRNOG00000051756	Zfp62	zinc finger protein 62 [Source:RGD Symbol;Acc:1560191]	protein_coding	5	0.066737	60	0.920883
ENSRNOG00000018382	Inpp4b	inositol polyphosphate-4-phosphatase type II B [Source:RGD Symbol;Acc:620470]	protein_coding	5	0.066437	238	3.10751
ENSRNOG00000032531	AC093965.1	60S ribosomal protein L13-like [Source:NCBI gene;Acc:100362400]	pseudogene	1	0.065786	236	18.1893
ENSRNOG00000004110	Trib2	tribbles pseudokinase 2 [Source:RGD Symbol;Acc:1564451]	protein_coding	4	0.065543	1632	29.819
ENSRNOG00000061438	LOC100360491	60S ribosomal protein L13-like [Source:RGD Symbol;Acc:2322065]	protein_coding	1	0.065476	286	21.934
ENSRNOG00000017154	Atp11a	ATPase phospholipid transporting 11A [Source:RGD Symbol;Acc:1308688]	protein_coding	11	0.065474	429	5.97106
ENSRNOG00000011040	AABR07063855.1	similar to translocase of outer mitochondrial membrane 70 homolog A [Source:NCBI gene;Acc:680142]	pseudogene	3	0.065392	110	2.94653
ENSRNOG00000007230	Kank3	KN motif and ankyrin repeat domains 3 [Source:RGD Symbol;Acc:1308853]	protein_coding	4	0.065303	0	0
ENSRNOG00000005981	Nt5c3a	5'-nucleotidase, cytosolic IIIA [Source:RGD Symbol;Acc:1312013]	protein_coding	3	0.064781	377	10.0342
ENSRNOG00000009227	Aplnr	apelin receptor [Source:RGD Symbol;Acc:621645]	protein_coding	6	0.064699	0	0
ENSRNOG00000049248	AABR07007905.1		protein_coding	1	0.064276	77	7.78817
ENSRNOG00000055527	Arap3	ArfGAP with RhoGAP domain, ankyrin repeat and PH domain 3 [Source:RGD Symbol;Acc:1304938]	protein_coding	7	0.064222	61	0.64248
ENSRNOG00000042667	AABR07049574.1		processed_pseudogene	1	0.064197	27	2.81128
ENSRNOG00000048819	AABR07068162.1		processed_pseudogene	1	0.064197	7	0.701298
ENSRNOG00000003524	Lrrc59	leucine rich repeat containing 59 [Source:RGD Symbol;Acc:1305092]	protein_coding	4	0.063921	257	4.47831
ENSRNOG00000031041	Rps4y2	ribosomal protein S4, Y-linked 2 [Source:RGD Symbol;Acc:1590988]	protein_coding	2	0.063921	25	1.26035
ENSRNOG00000029315	AC099294.1		protein_coding	4	0.063705	11	0.233486
ENSRNOG00000053654	AABR07061614.3		pseudogene	3	0.063466	11	0.273632
ENSRNOG00000029677	AY172581.6		Mt_tRNA	1	0.063321	5	3.2429
ENSRNOG00000021433	Arhgef39	Rho guanine nucleotide exchange factor 39 [Source:RGD Symbol;Acc:1310376]	protein_coding	7	0.063309	716	7.60604
ENSRNOG00000005480	Ybx3	Y box binding protein 3 [Source:RGD Symbol;Acc:621056]	protein_coding	3	0.063154	3123	100.008
ENSRNOG00000023269	AABR07021759.1		pseudogene	2	0.063111	123	6.34999
ENSRNOG00000005804	Eif3d	eukaryotic translation initiation factor 3, subunit D [Source:RGD Symbol;Acc:1303255]	protein_coding	3	0.063044	244	6.28417
ENSRNOG00000006136	Pdpk1	3-phosphoinositide dependent protein kinase-1 [Source:RGD Symbol;Acc:620307]	protein_coding	3	0.062912	492	12.7989
ENSRNOG00000016281	Col4a1	collagen type IV alpha 1 chain [Source:RGD Symbol;Acc:1307148]	protein_coding	10	0.062888	1976	14.6967
ENSRNOG00000015913	Tspan5	tetraspanin 5 [Source:RGD Symbol;Acc:1303176]	protein_coding	4	0.062823	983	16.8648
ENSRNOG00000033559	AC128290.1		protein_coding	1	0.062582	3	0.359099
ENSRNOG00000057077	U2	U2 spliceosomal RNA [Source:RFAM;Acc:RF00004]	snRNA	1	0.062516	0	0
ENSRNOG00000033321	Hmgb2l1	high mobility group box 2-like 1 [Source:RGD Symbol;Acc:1564519]	protein_coding	1	0.062249	18	1.38173
ENSRNOG00000014440	Josd1	Josephin domain containing 1 [Source:RGD Symbol;Acc:1305388]	protein_coding	4	0.062241	314	5.66301
ENSRNOG00000006285	Tlk2	tousled-like kinase 2 [Source:RGD Symbol;Acc:1310907]	protein_coding	6	0.062197	983	13.0431
ENSRNOG00000053557	LOC102553386	SUMO-conjugating enzyme UBC9-like [Source:RGD Symbol;Acc:7518044]	protein_coding	2	0.061676	116	5.82775
ENSRNOG00000031368	LOC499235	LRRGT00141 [Source:RGD Symbol;Acc:1565730]	protein_coding	5	0.061462	349	5.07119
ENSRNOG00000011114	Tbpl1	TATA-box binding protein like 1 [Source:RGD Symbol;Acc:1597456]	protein_coding	2	0.060075	232	9.05157
ENSRNOG00000004093	Rhot1	ras homolog family member T1 [Source:RGD Symbol;Acc:1307023]	protein_coding	3	0.059924	361	7.43463
ENSRNOG00000057706	Kdm5c	lysine (K)-specific demethylase 5C [Source:MGI Symbol;Acc:MGI:99781]	protein_coding	6	0.059568	480	8.10148
ENSRNOG00000062226	AABR07037407.1		processed_pseudogene	1	0.059398	0	0
ENSRNOG00000012349	Tlnrd1	talin rod domain containing 1 [Source:RGD Symbol;Acc:1311666]	protein_coding	3	0.059141	458	11.0811
ENSRNOG00000020782	Pspc1	paraspeckle component 1 [Source:RGD Symbol;Acc:1310122]	protein_coding	3	0.058792	239	8.44228
ENSRNOG00000046330	AABR07029581.1		protein_coding	2	0.058762	552	26.5686
ENSRNOG00000000827	Ier3	immediate early response 3 [Source:RGD Symbol;Acc:1303321]	protein_coding	2	0.058762	282	12.6349
ENSRNOG00000020947	Egln2	egl-9 family hypoxia-inducible factor 2 [Source:RGD Symbol;Acc:631376]	protein_coding	3	0.058591	215	5.27773
ENSRNOG00000056798	LOC102551071	myosin light polypeptide 6-like [Source:RGD Symbol;Acc:7517597]	processed_pseudogene	1	0.058263	0	0
ENSRNOG00000053960	LOC100910474	myosin light polypeptide 6-like [Source:RGD Symbol;Acc:6498281]	processed_pseudogene	1	0.058263	0	0
ENSRNOG00000027015	Ythdf1	YTH N(6)-methyladenosine RNA binding protein 1 [Source:RGD Symbol;Acc:1308932]	protein_coding	4	0.057977	479	7.61191
ENSRNOG00000002093	Tgfbr3	transforming growth factor beta receptor 3 [Source:RGD Symbol;Acc:61821]	protein_coding	8	0.057974	12202	98.7829
ENSRNOG00000016064	Tkt	transketolase [Source:RGD Symbol;Acc:621036]	protein_coding	3	0.05749	1039	24.4697
ENSRNOG00000031590	AABR07048308.2		pseudogene	1	0.057407	88	6.83683
ENSRNOG00000011645	Rrnad1	ribosomal RNA adenine dimethylase domain containing 1 [Source:RGD Symbol;Acc:1311265]	protein_coding	3	0.057265	48	1.13698
ENSRNOG00000008116	Plpp3	phospholipid phosphatase 3 [Source:RGD Symbol;Acc:620454]	protein_coding	4	0.057201	2504	39.7877
ENSRNOG00000043304	Apcdd1	APC down-regulated 1 [Source:RGD Symbol;Acc:1589962]	protein_coding	4	0.056887	286	4.44547
ENSRNOG00000031947	AABR07071986.1		protein_coding	1	0.056727	54	8.11666
ENSRNOG00000059406	Ier5	immediate early response 5 [Source:RGD Symbol;Acc:69252]	protein_coding	3	0.056669	157	3.67434
ENSRNOG00000020500	Clk2	CDC-like kinase 2 [Source:RGD Symbol;Acc:1359711]	protein_coding	3	0.05659	675	8.04319
ENSRNOG00000006335	Klhl9	kelch-like family member 9 [Source:RGD Symbol;Acc:1304814]	protein_coding	6	0.056493	1118	13.063
ENSRNOG00000055917	Trim27	tripartite motif-containing 27 [Source:RGD Symbol;Acc:1310105]	protein_coding	3	0.05634	25	0.574619
ENSRNOG00000062247	AABR07031521.1		processed_pseudogene	3	0.056335	348	8.70927
ENSRNOG00000008278	Nfrkb	nuclear factor related to kappa B binding protein [Source:RGD Symbol;Acc:1310558]	protein_coding	7	0.056026	1166	11.3773
ENSRNOG00000027798	AABR07064992.1		processed_pseudogene	2	0.055952	3	0.129951
ENSRNOG00000017940	Rere	arginine-glutamic acid dipeptide repeats [Source:RGD Symbol;Acc:629475]	protein_coding	10	0.055777	2787	17.7915
ENSRNOG00000019534	Ap2a2	adaptor related protein complex 2 subunit alpha 2 [Source:RGD Symbol;Acc:71015]	protein_coding	5	0.055486	1103	16.8363
ENSRNOG00000051382	Ntan1	N-terminal Asn amidase [Source:MGI Symbol;Acc:MGI:108471]	protein_coding	2	0.055349	242	19.1249
ENSRNOG00000010526	Dennd1a	DENN domain containing 1A [Source:RGD Symbol;Acc:1307927]	protein_coding	9	0.055326	302	2.04359
ENSRNOG00000033316	Foxo4	forkhead box O4 [Source:RGD Symbol;Acc:1561201]	protein_coding	4	0.055186	195	4.78442
ENSRNOG00000017730	Psmd1	proteasome 26S subunit, non-ATPase 1 [Source:RGD Symbol;Acc:621669]	protein_coding	4	0.055125	1148	18.3206
ENSRNOG00000033581	AABR07044388.2		processed_transcript	5	0.054992	1996	46.9133
ENSRNOG00000011157	Jak1	Janus kinase 1 [Source:RGD Symbol;Acc:69056]	protein_coding	6	0.054958	2294	26.16
ENSRNOG00000013321	Dock11	dedicator of cytokinesis 11 [Source:RGD Symbol;Acc:1564707]	protein_coding	9	0.054818	641	4.70019
ENSRNOG00000056162	AC111885.1		protein_coding	6	0.054762	1	4.8e-05
ENSRNOG00000012989	Serinc2	serine incorporator 2 [Source:RGD Symbol;Acc:1311396]	protein_coding	3	0.054581	0	0
ENSRNOG00000048337	LOC102551606	heterogeneous nuclear ribonucleoprotein R-like [Source:RGD Symbol;Acc:7597569]	pseudogene	2	0.054343	80	2.43809
ENSRNOG00000051170	Ddx17	DEAD-box helicase 17 [Source:RGD Symbol;Acc:1304945]	protein_coding	5	0.053965	2100	45.4189
ENSRNOG00000014525	Hspd1	heat shock protein family D (Hsp60) member 1 [Source:RGD Symbol;Acc:621314]	protein_coding	3	0.053885	1644	36.1252
ENSRNOG00000038347	Usp21	ubiquitin specific peptidase 21 [Source:RGD Symbol;Acc:1588822]	protein_coding	3	0.053859	300	6.61867
ENSRNOG00000062133	AC128084.2		processed_pseudogene	1	0.053635	8	0.662601
ENSRNOG00000011282	Ppp2r1a	protein phosphatase 2 scaffold subunit A alpha [Source:RGD Symbol;Acc:620907]	protein_coding	3	0.053581	4774	106.763
ENSRNOG00000060369	AABR07015687.1		pseudogene	2	0.053545	0	0
ENSRNOG00000061579	AABR07070810.1	ribosomal protein L12, pseudo 1 [Source:NCBI gene;Acc:296644]	protein_coding	1	0.053349	129	12.6262
ENSRNOG00000061125	7SK	7SK RNA [Source:RFAM;Acc:RF00100]	misc_RNA	1	0.053306	25	4.22015
ENSRNOG00000030228	LOC688932	similar to heat shock protein 8 [Source:RGD Symbol;Acc:1582975]	pseudogene	3	0.053134	453	11.3996
ENSRNOG00000001053	Tmed2	transmembrane p24 trafficking protein 2 [Source:RGD Symbol;Acc:69243]	protein_coding	3	0.052823	1353	33.8156
ENSRNOG00000018468	Ldb1	LIM domain binding 1 [Source:RGD Symbol;Acc:1310359]	protein_coding	3	0.052578	186	4.13857
ENSRNOG00000019450	Etf1	eukaryotic translation termination factor 1 [Source:RGD Symbol;Acc:1305712]	protein_coding	3	0.05226	858	18.551
ENSRNOG00000029028	Mknk2	MAP kinase-interacting serine/threonine kinase 2 [Source:RGD Symbol;Acc:1305728]	protein_coding	4	0.052211	206	2.94588
ENSRNOG00000010815	Elf2	E74 like ETS transcription factor 2 [Source:RGD Symbol;Acc:1310585]	protein_coding	4	0.051306	653	9.14728
ENSRNOG00000006228	Pdia4	protein disulfide isomerase family A, member 4 [Source:RGD Symbol;Acc:619835]	protein_coding	3	0.051269	662	13.9032
ENSRNOG00000016932	Simc1	SUMO-interacting motifs containing 1 [Source:RGD Symbol;Acc:2319689]	protein_coding	5	0.05101	90	1.14953
ENSRNOG00000001346	Cops6	COP9 signalosome subunit 6 [Source:RGD Symbol;Acc:1309919]	protein_coding	2	0.050897	861	35.8865
ENSRNOG00000016596	Hspa4	heat shock protein family A (Hsp70) member 4 [Source:RGD Symbol;Acc:628878]	protein_coding	6	0.050721	1987	21.5089
ENSRNOG00000006733	Srgap2	SLIT-ROBO Rho GTPase activating protein 2 [Source:RGD Symbol;Acc:1566016]	protein_coding	4	0.050674	949	14.1516
ENSRNOG00000046744	Ankrd29	ankyrin repeat domain 29 [Source:RGD Symbol;Acc:1587260]	protein_coding	3	0.050671	0	0
ENSRNOG00000020657	Shc1	SHC adaptor protein 1 [Source:RGD Symbol;Acc:620446]	protein_coding	5	0.050581	1659	24.7221
ENSRNOG00000019875	Matr3	matrin 3 [Source:RGD Symbol;Acc:3052]	protein_coding	6	0.05053	865	9.31249
ENSRNOG00000003099	Ubqln2	ubiquilin 2 [Source:RGD Symbol;Acc:1563566]	protein_coding	4	0.050515	563	8.11397
ENSRNOG00000049382	AABR07071905.1	similar to ribosomal protein L19 [Source:NCBI gene;Acc:292882]	pseudogene	1	0.05026	11	0.90639
ENSRNOG00000008797	Tmpo	thymopoietin [Source:RGD Symbol;Acc:3875]	protein_coding	4	0.050131	731	10.0677
ENSRNOG00000009812	Sbf2	SET binding factor 2 [Source:RGD Symbol;Acc:1588657]	protein_coding	8	0.050063	3078	26.7432
ENSRNOG00000001069	Elavl1	ELAV like RNA binding protein 1 [Source:RGD Symbol;Acc:1308649]	protein_coding	3	0.048957	536	10.7525
ENSRNOG00000013179	Tinagl1	tubulointerstitial nephritis antigen-like 1 [Source:RGD Symbol;Acc:70956]	protein_coding	3	0.048372	14	0.260751
ENSRNOG00000020426	Erf	Ets2 repressor factor [Source:RGD Symbol;Acc:1311991]	protein_coding	5	0.048264	295	3.8883
ENSRNOG00000001766	Tfrc	transferrin receptor [Source:RGD Symbol;Acc:70488]	protein_coding	6	0.048197	772	7.88241
ENSRNOG00000013064	Lrp8	LDL receptor related protein 8 [Source:RGD Symbol;Acc:1305729]	protein_coding	8	0.047965	153	1.00718
ENSRNOG00000046667	Fosb	FosB proto-oncogene, AP-1 transcription factor subunit [Source:RGD Symbol;Acc:1308198]	protein_coding	4	0.047821	26	0.338391
ENSRNOG00000030245	Tango2	transport and golgi organization 2 homolog [Source:RGD Symbol;Acc:1310348]	protein_coding	2	0.04782	0	0
ENSRNOG00000056150	Purb	purine rich element binding protein B [Source:RGD Symbol;Acc:1559465]	protein_coding	3	0.047607	1579	31.431
ENSRNOG00000020205	Agrn	agrin [Source:RGD Symbol;Acc:2067]	protein_coding	8	0.047155	926	6.06627
ENSRNOG00000025014	AABR07072260.1		protein_coding	1	0.047106	20	1.68253
ENSRNOG00000016313	Ctnnbip1	catenin, beta-interacting protein 1 [Source:RGD Symbol;Acc:1562749]	protein_coding	3	0.046775	40	0.761461
ENSRNOG00000034078	Mxi1	MAX interactor 1, dimerization protein [Source:RGD Symbol;Acc:3128]	protein_coding	4	0.04663	1328	25.2304
ENSRNOG00000030278	AABR07021008.1		protein_coding	1	0.046581	14	1.70338
ENSRNOG00000055568	LOC100910754	septin-7-like [Source:RGD Symbol;Acc:6497212]	processed_pseudogene	2	0.046546	171	6.63148
ENSRNOG00000031208	Mgat1	mannosyl (alpha-1,3-)-glycoprotein beta-1,2-N-acetylglucosaminyltransferase [Source:RGD Symbol;Acc:620097]	protein_coding	3	0.046265	250	4.75587
ENSRNOG00000010103	Eif4b	eukaryotic translation initiation factor 4B [Source:RGD Symbol;Acc:1306479]	protein_coding	4	0.046161	5868	77.7326
[truncated: 12,536 more rows]
