# Supplementary material
Source: HighWire-hosted journal article supplement (doi:10.1101/rna.073700.119)
Supplement: Supplemental_Table2.xlsx [file Supplemental_Table2.xlsx]

## Sheet: summary
Supplementary Table 2.
Sheet 1 (KEGG pathways): List of the KEGG pathways enriched in the mature motor axon transcriptome – data partially displayed in Figure 4B.
Sheet 2 (GO analysis): List of the GO terms enriched in the mature motor axons transcriptome – data partially displayed in the Figure 4C.

## Sheet: KEGG pathway
List of the KEGG pathways enriched in the mature motor axon transcriptome – data partially displayed in Figure 4B.
Category	ID	Term	PValue	Benjamini	Fold Enrichment	Count	%	Genes
KEGG_PATHWAY	rno03010	Ribosome	6.201645438551983E-24	1.4015718691127482E-21	4.1939437635183845	60	7.518796992481203	ENSRNOG00000001148, ENSRNOG00000038654, ENSRNOG00000011893, ENSRNOG00000032835, ENSRNOG00000048199, ENSRNOG00000046393, ENSRNOG00000004196, ENSRNOG00000042233, ENSRNOG00000014272, ENSRNOG00000010189, ENSRNOG00000008546, ENSRNOG00000017418, ENSRNOG00000023385, ENSRNOG00000004426, ENSRNOG00000000957, ENSRNOG00000027694, ENSRNOG00000033803, ENSRNOG00000004741, ENSRNOG00000018320, ENSRNOG00000026716,…
KEGG_PATHWAY	rno00190	Oxidative phosphorylation	1.2860677709039052E-13	1.4527712366430023E-11	3.607032667876588	41	5.137844611528822	ENSRNOG00000060293, ENSRNOG00000001596, ENSRNOG00000018816, ENSRNOG00000006542, ENSRNOG00000011905, ENSRNOG00000054689, ENSRNOG00000007967, ENSRNOG00000009080, ENSRNOG00000010807, ENSRNOG00000001551, ENSRNOG00000031979, ENSRNOG00000011949, ENSRNOG00000030644, ENSRNOG00000014568, ENSRNOG00000000840, ENSRNOG00000001991, ENSRNOG00000020602, ENSRNOG00000031033, ENSRNOG00000050514, ENSRNOG00000030237,…
KEGG_PATHWAY	rno05012	Parkinson's disease	2.98024007444563E-10	2.245114483212518E-8	3.1206176598521096	37	4.636591478696742	ENSRNOG00000060293, ENSRNOG00000001596, ENSRNOG00000018816, ENSRNOG00000054689, ENSRNOG00000007967, ENSRNOG00000010807, ENSRNOG00000001551, ENSRNOG00000031979, ENSRNOG00000011949, ENSRNOG00000030644, ENSRNOG00000014568, ENSRNOG00000001991, ENSRNOG00000020602, ENSRNOG00000010830, ENSRNOG00000031033, ENSRNOG00000050514, ENSRNOG00000030237, ENSRNOG00000009364, ENSRNOG00000029971, ENSRNOG00000030700,…
KEGG_PATHWAY	rno04260	Cardiac muscle contraction	4.494427500975358E-6	2.5390348550458075E-4	3.887719298245614	16	2.0050125313283207	ENSRNOG00000018816, ENSRNOG00000030700, ENSRNOG00000054689, ENSRNOG00000011227, ENSRNOG00000012550, ENSRNOG00000021177, ENSRNOG00000016660, ENSRNOG00000017817, ENSRNOG00000010807, ENSRNOG00000007290, ENSRNOG00000030371, ENSRNOG00000001170, ENSRNOG00000030019, ENSRNOG00000030237, ENSRNOG00000031766, ENSRNOG00000034234
KEGG_PATHWAY	rno05016	Huntington's disease	5.946159937463063E-6	2.687311135631809E-4	2.282756232686981	34	4.260651629072681	ENSRNOG00000060293, ENSRNOG00000019048, ENSRNOG00000001596, ENSRNOG00000018816, ENSRNOG00000054689, ENSRNOG00000007967, ENSRNOG00000010807, ENSRNOG00000001551, ENSRNOG00000031979, ENSRNOG00000011949, ENSRNOG00000014568, ENSRNOG00000001991, ENSRNOG00000020602, ENSRNOG00000010830, ENSRNOG00000028834, ENSRNOG00000050514, ENSRNOG00000030237, ENSRNOG00000009364, ENSRNOG00000002115, ENSRNOG00000030700,…
KEGG_PATHWAY	rno05010	Alzheimer's disease	7.518582539866894E-6	2.831609093524312E-4	2.3326315789473684	32	4.010025062656641	ENSRNOG00000060293, ENSRNOG00000001596, ENSRNOG00000018816, ENSRNOG00000054689, ENSRNOG00000007967, ENSRNOG00000010807, ENSRNOG00000001551, ENSRNOG00000031979, ENSRNOG00000011949, ENSRNOG00000014568, ENSRNOG00000001991, ENSRNOG00000020602, ENSRNOG00000002833, ENSRNOG00000050514, ENSRNOG00000030237, ENSRNOG00000009364, ENSRNOG00000004060, ENSRNOG00000009882, ENSRNOG00000030700, ENSRNOG00000012550,…
KEGG_PATHWAY	rno04932	Non-alcoholic fatty liver disease (NAFLD)	9.658182171234772E-5	0.0031135066459784255	2.2401797175866496	27	3.3834586466165413	ENSRNOG00000060293, ENSRNOG00000017801, ENSRNOG00000018816, ENSRNOG00000054689, ENSRNOG00000007967, ENSRNOG00000010807, ENSRNOG00000009085, ENSRNOG00000011949, ENSRNOG00000014568, ENSRNOG00000020602, ENSRNOG00000002833, ENSRNOG00000050514, ENSRNOG00000030237, ENSRNOG00000009364, ENSRNOG00000030700, ENSRNOG00000012550, ENSRNOG00000021177, ENSRNOG00000016660, ENSRNOG00000017817, ENSRNOG00000020773,…
KEGG_PATHWAY	rno04978	Mineral absorption	0.01273756106707962	0.30382030236259605	3.401754385964912	7	0.8771929824561403	ENSRNOG00000043098, ENSRNOG00000020843, ENSRNOG00000011227, ENSRNOG00000030019, ENSRNOG00000022619, ENSRNOG00000007290, ENSRNOG00000031506
KEGG_PATHWAY	rno04114	Oocyte meiosis	0.01726900952733566	0.35430756242885353	1.9625506072874492	15	1.8796992481203008	ENSRNOG00000004060, ENSRNOG00000005290, ENSRNOG00000009882, ENSRNOG00000018708, ENSRNOG00000016280, ENSRNOG00000001316, ENSRNOG00000008195, ENSRNOG00000003139, ENSRNOG00000055471, ENSRNOG00000004612, ENSRNOG00000017536, ENSRNOG00000011295, ENSRNOG00000004973, ENSRNOG00000005904, ENSRNOG00000005828
KEGG_PATHWAY	rno04120	Ubiquitin mediated proteolysis	0.022406069689031846	0.4007859057625859	1.73125	19	2.380952380952381	ENSRNOG00000016930, ENSRNOG00000061040, ENSRNOG00000004814, ENSRNOG00000016280, ENSRNOG00000017610, ENSRNOG00000001316, ENSRNOG00000016963, ENSRNOG00000058898, ENSRNOG00000039985, ENSRNOG00000008039, ENSRNOG00000020897, ENSRNOG00000006248, ENSRNOG00000017493, ENSRNOG00000013177, ENSRNOG00000031730, ENSRNOG00000017536, ENSRNOG00000011295, ENSRNOG00000005828, ENSRNOG00000005904
KEGG_PATHWAY	rno04141	Protein processing in endoplasmic reticulum	0.040965147045681036	0.5765722714104261	1.5483847549909255	22	2.756892230576441	ENSRNOG00000017801, ENSRNOG00000003029, ENSRNOG00000008604, ENSRNOG00000015018, ENSRNOG00000037137, ENSRNOG00000012576, ENSRNOG00000007892, ENSRNOG00000011066, ENSRNOG00000018294, ENSRNOG00000019834, ENSRNOG00000003343, ENSRNOG00000000438, ENSRNOG00000000902, ENSRNOG00000026963, ENSRNOG00000009090, ENSRNOG00000002251, ENSRNOG00000036698, ENSRNOG00000048509, ENSRNOG00000009217, ENSRNOG00000053172,…
KEGG_PATHWAY	rno04110	Cell cycle	0.05727938065055767	0.6707342061954501	1.7213696892834494	14	1.7543859649122806	ENSRNOG00000018140, ENSRNOG00000005290, ENSRNOG00000020918, ENSRNOG00000051965, ENSRNOG00000001316, ENSRNOG00000008195, ENSRNOG00000003139, ENSRNOG00000055471, ENSRNOG00000002833, ENSRNOG00000008620, ENSRNOG00000017536, ENSRNOG00000011295, ENSRNOG00000005904, ENSRNOG00000005828
KEGG_PATHWAY	rno04966	Collecting duct acid secretion	0.07681331559952848	0.7507863301272216	3.001547987616099	5	0.6265664160401002	ENSRNOG00000007392, ENSRNOG00000000840, ENSRNOG00000006542, ENSRNOG00000011905, ENSRNOG00000009080
KEGG_PATHWAY	rno04710	Circadian rhythm	0.07807751836658276	0.7308050962200536	2.551315789473684	6	0.7518796992481203	ENSRNOG00000059334, ENSRNOG00000007387, ENSRNOG00000016280, ENSRNOG00000013408, ENSRNOG00000009085, ENSRNOG00000005828
KEGG_PATHWAY	rno04721	Synaptic vesicle cycle	0.08024328912712414	0.7164219074793047	2.093387314439946	8	1.0025062656641603	ENSRNOG00000007392, ENSRNOG00000000840, ENSRNOG00000052707, ENSRNOG00000006542, ENSRNOG00000011905, ENSRNOG00000003905, ENSRNOG00000001709, ENSRNOG00000009080

## Sheet: GO analysis
List of the GO terms enriched in the mature motor axons transcriptome – data partially displayed in the Figure 4C.
Category	ID	Term	PValue	Benjamini	Fold Enrichment	Count	%	Genes
BP	GO:0006412	translation	6.660588093078323E-19	1.8809500774853184E-15	3.573169482846902	61	7.644110275689223	ENSRNOG00000038654, ENSRNOG00000011893, ENSRNOG00000032835, ENSRNOG00000048199, ENSRNOG00000046393, ENSRNOG00000004196, ENSRNOG00000042233, ENSRNOG00000014272, ENSRNOG00000010189, ENSRNOG00000040273, ENSRNOG00000008546, ENSRNOG00000010830, ENSRNOG00000017418, ENSRNOG00000023385, ENSRNOG00000004426, ENSRNOG00000000957, ENSRNOG00000027694, ENSRNOG00000033803, ENSRNOG00000009439, ENSRNOG00000004741,…
BP	GO:1902600	hydrogen ion transmembrane transport	5.466214977041251E-6	0.007688606922102492	4.860130718954248	13	1.6290726817042605	ENSRNOG00000018816, ENSRNOG00000030700, ENSRNOG00000012550, ENSRNOG00000054689, ENSRNOG00000021177, ENSRNOG00000017817, ENSRNOG00000010807, ENSRNOG00000030371, ENSRNOG00000000840, ENSRNOG00000001170, ENSRNOG00000030237, ENSRNOG00000031766, ENSRNOG00000034234
CC	GO:0022625	cytosolic large ribosomal subunit	2.1359314714797128E-20	1.2302965275723146E-17	6.012502837585346	38	4.761904761904762	ENSRNOG00000018680, ENSRNOG00000001148, ENSRNOG00000038654, ENSRNOG00000032835, ENSRNOG00000000505, ENSRNOG00000033686, ENSRNOG00000042233, ENSRNOG00000014272, ENSRNOG00000004107, ENSRNOG00000025936, ENSRNOG00000026260, ENSRNOG00000040273, ENSRNOG00000013874, ENSRNOG00000019974, ENSRNOG00000023385, ENSRNOG00000048701, ENSRNOG00000000957, ENSRNOG00000018795, ENSRNOG00000002116, ENSRNOG00000033803,…
CC	GO:0070062	extracellular exosome	1.8057272501006696E-17	5.200494480289929E-15	1.6520785449080624	231	28.947368421052634	ENSRNOG00000010977, ENSRNOG00000009068, ENSRNOG00000030199, ENSRNOG00000017610, ENSRNOG00000020151, ENSRNOG00000001991, ENSRNOG00000030683, ENSRNOG00000016890, ENSRNOG00000017418, ENSRNOG00000030019, ENSRNOG00000001592, ENSRNOG00000023385, ENSRNOG00000002461, ENSRNOG00000015093, ENSRNOG00000054140, ENSRNOG00000021202, ENSRNOG00000012162, ENSRNOG00000033556, ENSRNOG00000037607, ENSRNOG00000031127,…
CC	GO:0005840	ribosome	2.7759904831862773E-13	5.3290705182007514E-11	4.231739211657015	35	4.385964912280701	ENSRNOG00000047365, ENSRNOG00000054854, ENSRNOG00000048199, ENSRNOG00000046393, ENSRNOG00000014582, ENSRNOG00000010189, ENSRNOG00000004107, ENSRNOG00000025936, ENSRNOG00000016580, ENSRNOG00000008546, ENSRNOG00000026260, ENSRNOG00000017418, ENSRNOG00000054626, ENSRNOG00000052207, ENSRNOG00000019974, ENSRNOG00000023385, ENSRNOG00000004426, ENSRNOG00000000957, ENSRNOG00000018795, ENSRNOG00000042740,…
CC	GO:0043209	myelin sheath	1.8173144191134649E-12	2.616946659372843E-10	3.3809408109960866	43	5.3884711779448615	ENSRNOG00000024128, ENSRNOG00000019048, ENSRNOG00000018816, ENSRNOG00000053468, ENSRNOG00000021317, ENSRNOG00000018294, ENSRNOG00000007367, ENSRNOG00000011329, ENSRNOG00000001991, ENSRNOG00000016516, ENSRNOG00000002693, ENSRNOG00000010872, ENSRNOG00000029886, ENSRNOG00000010830, ENSRNOG00000060728, ENSRNOG00000030019, ENSRNOG00000019974, ENSRNOG00000010524, ENSRNOG00000013468, ENSRNOG00000004426,…
CC	GO:0022627	cytosolic small ribosomal subunit	3.342879639560913E-11	3.850999519272591E-9	5.126449787835926	24	3.007518796992481	ENSRNOG00000027694, ENSRNOG00000011893, ENSRNOG00000048199, ENSRNOG00000020595, ENSRNOG00000019453, ENSRNOG00000014179, ENSRNOG00000016961, ENSRNOG00000028690, ENSRNOG00000004196, ENSRNOG00000019578, ENSRNOG00000052141, ENSRNOG00000016411, ENSRNOG00000018320, ENSRNOG00000010189, ENSRNOG00000016580, ENSRNOG00000018645, ENSRNOG00000029886, ENSRNOG00000020982, ENSRNOG00000017418, ENSRNOG00000054626,…
CC	GO:0005925	focal adhesion	9.041451431565777E-11	8.679798213506729E-9	2.3958927049975025	63	7.894736842105263	ENSRNOG00000001148, ENSRNOG00000001149, ENSRNOG00000011893, ENSRNOG00000000826, ENSRNOG00000048199, ENSRNOG00000002881, ENSRNOG00000015658, ENSRNOG00000004196, ENSRNOG00000000991, ENSRNOG00000020151, ENSRNOG00000036852, ENSRNOG00000004612, ENSRNOG00000042821, ENSRNOG00000020660, ENSRNOG00000017418, ENSRNOG00000023385, ENSRNOG00000004616, ENSRNOG00000027864, ENSRNOG00000015018, ENSRNOG00000004741,…
CC	GO:0005751	mitochondrial respiratory chain complex IV	5.112786445202853E-8	4.207084107865633E-6	11.534512022630835	9	1.1278195488721803	ENSRNOG00000030371, ENSRNOG00000001170, ENSRNOG00000018816, ENSRNOG00000021177, ENSRNOG00000016660, ENSRNOG00000010807, ENSRNOG00000017817, ENSRNOG00000030237, ENSRNOG00000034234
CC	GO:0031012	extracellular matrix	5.342996177382465E-6	3.846227661811197E-4	2.3894469350082708	33	4.135338345864661	ENSRNOG00000003029, ENSRNOG00000019453, ENSRNOG00000021317, ENSRNOG00000024629, ENSRNOG00000004107, ENSRNOG00000018294, ENSRNOG00000003869, ENSRNOG00000011329, ENSRNOG00000003120, ENSRNOG00000018645, ENSRNOG00000026963, ENSRNOG00000004303, ENSRNOG00000020660, ENSRNOG00000003357, ENSRNOG00000058003, ENSRNOG00000002115, ENSRNOG00000002461, ENSRNOG00000058444, ENSRNOG00000005041, ENSRNOG00000020595,…
CC	GO:0070469	respiratory chain	1.500798780879015E-5	9.600572773362792E-4	9.968096809680969	7	0.8771929824561403	ENSRNOG00000005668, ENSRNOG00000030371, ENSRNOG00000029971, ENSRNOG00000031033, ENSRNOG00000019428, ENSRNOG00000033615, ENSRNOG00000029042
CC	GO:0015935	small ribosomal subunit	1.9821122151306762E-5	0.0011410564503586684	5.825511122540826	10	1.2531328320802004	ENSRNOG00000016580, ENSRNOG00000018645, ENSRNOG00000020982, ENSRNOG00000019453, ENSRNOG00000004196, ENSRNOG00000019578, ENSRNOG00000004426, ENSRNOG00000010189, ENSRNOG00000004616, ENSRNOG00000003201
CC	GO:0005747	mitochondrial respiratory chain complex I	4.089700839876807E-5	0.002139268364905522	3.8175689909416475	14	1.7543859649122806	ENSRNOG00000060293, ENSRNOG00000029971, ENSRNOG00000031053, ENSRNOG00000029707, ENSRNOG00000011949, ENSRNOG00000030644, ENSRNOG00000005668, ENSRNOG00000014568, ENSRNOG00000020602, ENSRNOG00000002721, ENSRNOG00000031033, ENSRNOG00000050514, ENSRNOG00000033615, ENSRNOG00000009364
CC	GO:0005615	extracellular space	1.2199448876079602E-4	0.005838979184953574	1.5874252530639483	68	8.521303258145362	ENSRNOG00000012271, ENSRNOG00000038654, ENSRNOG00000018233, ENSRNOG00000010977, ENSRNOG00000032835, ENSRNOG00000015654, ENSRNOG00000006949, ENSRNOG00000003148, ENSRNOG00000001201, ENSRNOG00000001049, ENSRNOG00000003869, ENSRNOG00000042821, ENSRNOG00000020660, ENSRNOG00000000571, ENSRNOG00000043451, ENSRNOG00000003357, ENSRNOG00000004426, ENSRNOG00000058003, ENSRNOG00000027864, ENSRNOG00000001136,…
CC	GO:0042383	sarcolemma	1.2199567846830788E-4	0.0053910923466267135	2.9845769312743404	17	2.1303258145363406	ENSRNOG00000009882, ENSRNOG00000000826, ENSRNOG00000055962, ENSRNOG00000011076, ENSRNOG00000011058, ENSRNOG00000057569, ENSRNOG00000007290, ENSRNOG00000002372, ENSRNOG00000042821, ENSRNOG00000010362, ENSRNOG00000019629, ENSRNOG00000011307, ENSRNOG00000046905, ENSRNOG00000030019, ENSRNOG00000008414, ENSRNOG00000001254, ENSRNOG00000019400
CC	GO:0030529	intracellular ribonucleoprotein complex	2.208381645427987E-4	0.00904575520664408	2.563224893917963	20	2.506265664160401	ENSRNOG00000001148, ENSRNOG00000008629, ENSRNOG00000011893, ENSRNOG00000019453, ENSRNOG00000014179, ENSRNOG00000020683, ENSRNOG00000018630, ENSRNOG00000012314, ENSRNOG00000023529, ENSRNOG00000034254, ENSRNOG00000054626, ENSRNOG00000017418, ENSRNOG00000002833, ENSRNOG00000020674, ENSRNOG00000011621, ENSRNOG00000018273, ENSRNOG00000004616, ENSRNOG00000017106, ENSRNOG00000050800, ENSRNOG00000003201
CC	GO:0030424	axon	3.217032134994313E-4	0.012279376432260958	1.948995887080479	33	4.135338345864661	ENSRNOG00000018839, ENSRNOG00000001628, ENSRNOG00000005290, ENSRNOG00000017905, ENSRNOG00000011927, ENSRNOG00000020151, ENSRNOG00000013089, ENSRNOG00000005299, ENSRNOG00000010392, ENSRNOG00000030840, ENSRNOG00000002833, ENSRNOG00000058006, ENSRNOG00000010524, ENSRNOG00000019959, ENSRNOG00000008716, ENSRNOG00000001528, ENSRNOG00000013916, ENSRNOG00000028746, ENSRNOG00000011705, ENSRNOG00000011517,…
CC	GO:0005737	cytoplasm	3.2227204385837973E-4	0.01153660058706385	1.1657949131077536	306	38.34586466165413	ENSRNOG00000012271, ENSRNOG00000017801, ENSRNOG00000012563, ENSRNOG00000010977, ENSRNOG00000023661, ENSRNOG00000009068, ENSRNOG00000017610, ENSRNOG00000020151, ENSRNOG00000010189, ENSRNOG00000051885, ENSRNOG00000007701, ENSRNOG00000016890, ENSRNOG00000017418, ENSRNOG00000001592, ENSRNOG00000009481, ENSRNOG00000009264, ENSRNOG00000061040, ENSRNOG00000017939, ENSRNOG00000047611, ENSRNOG00000009882,…
CC	GO:0005874	microtubule	4.927641956368075E-4	0.016561451281214	2.1089825076540203	26	3.258145363408521	ENSRNOG00000017466, ENSRNOG00000057626, ENSRNOG00000017905, ENSRNOG00000053468, ENSRNOG00000054118, ENSRNOG00000008921, ENSRNOG00000021317, ENSRNOG00000020748, ENSRNOG00000005299, ENSRNOG00000016890, ENSRNOG00000010117, ENSRNOG00000002833, ENSRNOG00000060728, ENSRNOG00000015544, ENSRNOG00000001592, ENSRNOG00000007975, ENSRNOG00000011222, ENSRNOG00000007937, ENSRNOG00000020773, ENSRNOG00000047505,…
CC	GO:0043025	neuronal cell body	5.540389382358167E-4	0.017577834443680995	1.7457179510072507	41	5.137844611528822	ENSRNOG00000018839, ENSRNOG00000017905, ENSRNOG00000015654, ENSRNOG00000010827, ENSRNOG00000005299, ENSRNOG00000003148, ENSRNOG00000030644, ENSRNOG00000010233, ENSRNOG00000010872, ENSRNOG00000016516, ENSRNOG00000018645, ENSRNOG00000019629, ENSRNOG00000002833, ENSRNOG00000015619, ENSRNOG00000032828, ENSRNOG00000058006, ENSRNOG00000049437, ENSRNOG00000016478, ENSRNOG00000002115, ENSRNOG00000012183,…
CC	GO:0005743	mitochondrial inner membrane	5.929111868393548E-4	0.017819227466127296	1.8621719314788623	34	4.260651629072681	ENSRNOG00000060293, ENSRNOG00000019048, ENSRNOG00000018816, ENSRNOG00000007967, ENSRNOG00000010807, ENSRNOG00000024629, ENSRNOG00000001551, ENSRNOG00000031979, ENSRNOG00000011949, ENSRNOG00000030644, ENSRNOG00000014568, ENSRNOG00000010830, ENSRNOG00000014254, ENSRNOG00000017418, ENSRNOG00000031033, ENSRNOG00000030237, ENSRNOG00000009364, ENSRNOG00000029971, ENSRNOG00000001440, ENSRNOG00000030700,…
CC	GO:0014069	postsynaptic density	5.932253687718371E-4	0.016944755210082985	2.1218749121837446	25	3.132832080200501	ENSRNOG00000018839, ENSRNOG00000005434, ENSRNOG00000019354, ENSRNOG00000020748, ENSRNOG00000010233, ENSRNOG00000009029, ENSRNOG00000031033, ENSRNOG00000030019, ENSRNOG00000002833, ENSRNOG00000032828, ENSRNOG00000010524, ENSRNOG00000001528, ENSRNOG00000008716, ENSRNOG00000012378, ENSRNOG00000013916, ENSRNOG00000004806, ENSRNOG00000003905, ENSRNOG00000007975, ENSRNOG00000011076, ENSRNOG00000007410,…
CC	GO:0005913	cell-cell adherens junction	7.466835552779191E-4	0.020279657905256654	1.881265977187496	32	4.010025062656641	ENSRNOG00000005434, ENSRNOG00000005290, ENSRNOG00000017466, ENSRNOG00000000826, ENSRNOG00000015658, ENSRNOG00000020151, ENSRNOG00000019834, ENSRNOG00000018294, ENSRNOG00000011329, ENSRNOG00000010233, ENSRNOG00000010067, ENSRNOG00000030840, ENSRNOG00000048981, ENSRNOG00000047088, ENSRNOG00000001592, ENSRNOG00000009264, ENSRNOG00000018593, ENSRNOG00000007128, ENSRNOG00000012378, ENSRNOG00000007648,…
CC	GO:0005739	mitochondrion	7.467244382437359E-4	0.019367891493922484	1.3261902712010332	119	14.912280701754385	ENSRNOG00000060293, ENSRNOG00000001596, ENSRNOG00000019048, ENSRNOG00000024629, ENSRNOG00000011949, ENSRNOG00000014568, ENSRNOG00000001991, ENSRNOG00000008546, ENSRNOG00000010830, ENSRNOG00000008405, ENSRNOG00000022619, ENSRNOG00000042740, ENSRNOG00000001136, ENSRNOG00000009882, ENSRNOG00000001717, ENSRNOG00000015018, ENSRNOG00000021177, ENSRNOG00000031053, ENSRNOG00000036971, ENSRNOG00000018320,…
CC	GO:0045277	respiratory chain complex IV	0.0017749935499842295	0.04351627953334125	12.816124469589818	4	0.5012531328320802	ENSRNOG00000030371, ENSRNOG00000030700, ENSRNOG00000054689, ENSRNOG00000034234
MF	GO:0003735	structural constituent of ribosome	3.680016889329818E-22	2.82993298789463E-19	3.712610722453468	68	8.521303258145362	ENSRNOG00000001148, ENSRNOG00000038654, ENSRNOG00000011893, ENSRNOG00000032835, ENSRNOG00000048199, ENSRNOG00000046393, ENSRNOG00000004196, ENSRNOG00000042233, ENSRNOG00000014272, ENSRNOG00000010189, ENSRNOG00000040273, ENSRNOG00000008546, ENSRNOG00000010830, ENSRNOG00000017418, ENSRNOG00000023385, ENSRNOG00000004426, ENSRNOG00000000957, ENSRNOG00000027694, ENSRNOG00000033803, ENSRNOG00000004741,…
MF	GO:0070180	large ribosomal subunit rRNA binding	2.4686043831125194E-9	9.491779547898815E-7	10.48686535516551	11	1.3784461152882206	ENSRNOG00000018680, ENSRNOG00000001148, ENSRNOG00000002116, ENSRNOG00000013874, ENSRNOG00000037607, ENSRNOG00000004741, ENSRNOG00000031052, ENSRNOG00000023385, ENSRNOG00000028993, ENSRNOG00000004107, ENSRNOG00000016220
MF	GO:0004129	cytochrome-c oxidase activity	1.2448079107721767E-7	3.190806903630161E-5	8.01936762453833	11	1.3784461152882206	ENSRNOG00000030371, ENSRNOG00000001170, ENSRNOG00000030700, ENSRNOG00000018816, ENSRNOG00000054689, ENSRNOG00000021177, ENSRNOG00000016660, ENSRNOG00000010807, ENSRNOG00000017817, ENSRNOG00000030237, ENSRNOG00000034234
MF	GO:0044822	poly(A) RNA binding	2.0101845824291874E-6	3.863837089849165E-4	1.5197187157014787	116	14.536340852130325	ENSRNOG00000012271, ENSRNOG00000001148, ENSRNOG00000023661, ENSRNOG00000011893, ENSRNOG00000010827, ENSRNOG00000010189, ENSRNOG00000001049, ENSRNOG00000017418, ENSRNOG00000047134, ENSRNOG00000010117, ENSRNOG00000023385, ENSRNOG00000058677, ENSRNOG00000003495, ENSRNOG00000050800, ENSRNOG00000027864, ENSRNOG00000000957, ENSRNOG00000018848, ENSRNOG00000000938, ENSRNOG00000042740, ENSRNOG00000001136,…
MF	GO:0005515	protein binding	2.0622795023900838E-6	3.171286186094413E-4	1.4740748939723622	130	16.290726817042607	ENSRNOG00000008604, ENSRNOG00000011893, ENSRNOG00000017610, ENSRNOG00000020151, ENSRNOG00000036816, ENSRNOG00000013177, ENSRNOG00000010830, ENSRNOG00000010117, ENSRNOG00000017418, ENSRNOG00000047134, ENSRNOG00000030019, ENSRNOG00000007387, ENSRNOG00000022619, ENSRNOG00000009264, ENSRNOG00000003495, ENSRNOG00000000938, ENSRNOG00000002461, ENSRNOG00000009882, ENSRNOG00000015018, ENSRNOG00000020773,…
MF	GO:0008137	NADH dehydrogenase (ubiquinone) activity	1.1244595297620539E-5	0.0014401523839688846	4.957427258805513	12	1.5037593984962405	ENSRNOG00000030644, ENSRNOG00000005668, ENSRNOG00000020602, ENSRNOG00000029971, ENSRNOG00000031033, ENSRNOG00000002721, ENSRNOG00000033615, ENSRNOG00000031053, ENSRNOG00000029707, ENSRNOG00000029042, ENSRNOG00000034182, ENSRNOG00000009364
MF	GO:0005200	structural constituent of cytoskeleton	3.869380170600189E-4	0.041624994248063873	3.2880895083914115	13	1.6290726817042605	ENSRNOG00000047505, ENSRNOG00000005434, ENSRNOG00000021438, ENSRNOG00000060728, ENSRNOG00000015544, ENSRNOG00000018087, ENSRNOG00000053468, ENSRNOG00000011076, ENSRNOG00000000991, ENSRNOG00000003206, ENSRNOG00000004959, ENSRNOG00000008716, ENSRNOG00000013658
