# Supplementary material
Source: HighWire-hosted journal article supplement (doi:10.1101/rna.073700.119)
Supplement: Supplemental_Table5.xlsx [file Supplemental_Table5.xlsx]

## Sheet: Sheet1
Gene	Primer Foward	Primer Reverse
Actb	TATGTTGCCCTAGACTTCGAGC	CAGCTCATAGCTCTTCTCCAGG
Eif3e	TTATTCTGATGATATCCCTCATGC	TGGATCTTCAAACATCTTCACG
Kcna1	ACCAGGCAAGCAATCAAAAG	AAAGCATTCAAAGACTACGGTTTT
Mag	GTGGAGCTGAGCGTCATGTAT	GTGGAACACAGGATGGAGACTG
Mbp	ACGGACACCCTTTCAAGTTCAC	GTGCCTGTCTATCCGCAGTG
Mt-cyb	GTCACCCACATCTGCCGAGACG	ATTGAGGCGCCGTTGGCGTG
Mt2a	CTGTTCCTGCTGCCCCG	GCACTTGTCCGAAGCCTCT
Nefh	CCTAAGCAATGGCCCAGAG	CCTCAAGCTGCCTCACCTTA
Nefl	CCGGTTCTTCTCTCTAGGTCCC	GTAGGAGGTCGAAAAGTACGGC
Nefm	AGTCGAGGCCCCCAAGCTCA	CAGAGGCTGCCAATTCCTCTGC
Pdcd4	TGAGCACGGAGATACGAACGA	GCTAAGGACACTGCCAACACG
Pmp22	GAATTCCTGTTCCTGTTCTTCTGCCAGCTC	AAGCTTGTAGATGGCCGCTGCACTCATC
Skap2	ATCTGTGCTCCCGATAAACG	CGTCAGATCCCATGTCTTGTAA
Snca	CATCTTTAGCCATGGATGTGTTC	CACACCCTGCTTGGTTTTCT
Stt3a	TCTAAAGCTGGTCATCCTGTCG	TGAGCACAGCAAAAAGACGA
Sv2b	GCACCGTCCAGAGCAGATGGC	AGGGTCCACTGGAAGCGCCC
Syn1	GTCTCTGACCAATGCCTTCAAC	GAGAAGAGGCTGGCGAAAGAC
Tubb4b	TGTTCCTCTTCTACAGCCGC	CTCGTCGCTGATTACCTCCC
Vim	AGATCGCCACCTACAGGAAG	CCAGAGGAAGTGACTCCAGGT
