# Supplementary material
Source: HighWire-hosted journal article supplement (doi:10.1101/rna.073700.119)
Supplement: Supplemental_Table_Legends.docx [file Supplemental_Table_Legends.docx]

**Table S1. Transcriptome of ventral roots and mature motor axons.** This table contains Gene_ID, Gene Name, Gene Description, Gene Biotype, Counts (read mapped to each gene) and TPM (Transcript per Million) for Axons and Ventral Roots samples. Data partially displayed in Figures 3A, 3C, 3D and 4A.

**Table S2. KEGG pathways and GO terms enriched in mature motor axons transcriptome.** Contains the list of KEGG pathways and GO terms enriched in mature motor axons (using the ventral root transcriptome as background). Data partially displayed in Figures 4B and 4C.

**Table S3.** **Cross-comparison of RNAs detected in our mature motor axon transcriptome with those associated with mitochondria.** Contains the gene list of common genes between our mature motor axons transcriptome and genes associated to the Outer Mitochondrial Membrane (OMM) (Fazal et al., 2019).

**Table S4. Axonal RNA-Seq datasets cross-comparison.** Contains the gene lists corresponding to the Venn diagram in Figure 7A, showing comparisons of our mature motor axon transcriptome with primary DRG axons (Minis et al., 2014), primary motor axons (Briese et al., 2016), neurons differentiated from mESC (Zappulo et al., 2017) and motor neurons derived from mESC (Nijssen et al., 2018). Also contains the gene list corresponding to the comparison of our mature motor axon transcriptome with the mRNAs being translated in adult axon terminals of RGCs (Shigeoka et al., 2016), the genes enriched in the presynaptic boutons (Hafner et al., 2019) or the Gene Ontology pre-synapse (GO:0098793).

**Table S5. List of primers used for RT**
